# Supplementary material
Source: PubMed Central journal article supplement (PMC2877552)

Supplementary File S3.

MLEs, HPD intervals, and coefficients of variation for the six demographic parameters under various simulation conditions. For MLE/HPD graphs, black shapes are average MLEs for the five simulated datasets for each condition, and grey shapes are average  $HPD90_{Hi}$  and  $HPD90_{Lo}$  values. The thin black line on each graph represents the true value for each parameter (or the pre-sweep/neutral value for selective sweep simulations). For each of the following eight sets simulation conditions, there are five graphs in the following order: current effective population size MLEs/HPDs, ancestral effective population size MLEs/HPDs, divergence time MLEs/HPDs, gene flow MLEs/HPDs, and coefficients of variation for all parameters.

A) Infinite sites vs. HKY vs. GTR evolution. Each set of simulations is labeled by the substitution model used for simulation (simulation program in parentheses) followed by the substitution model used for IMA analysis. (Graphs 1-5)

B) Recombination, full HKY datasets. (Graphs 6-10)

C) Recombination, HKY non-recombining blocks. (Graphs 11-15)

D) Gene flow between first focal species and third unsampled species. (Graphs 16-20)

E) Population structure within species. (Graphs 21-25)

F) Linkage among loci. (Graphs 26-30)

G) Divergent selective sweeps. (Graphs 31-35)

H) Complex demography. (Graphs 36-40)

# Current Effective Population Sizes, IS vs. HKY vs. GTR Evolution

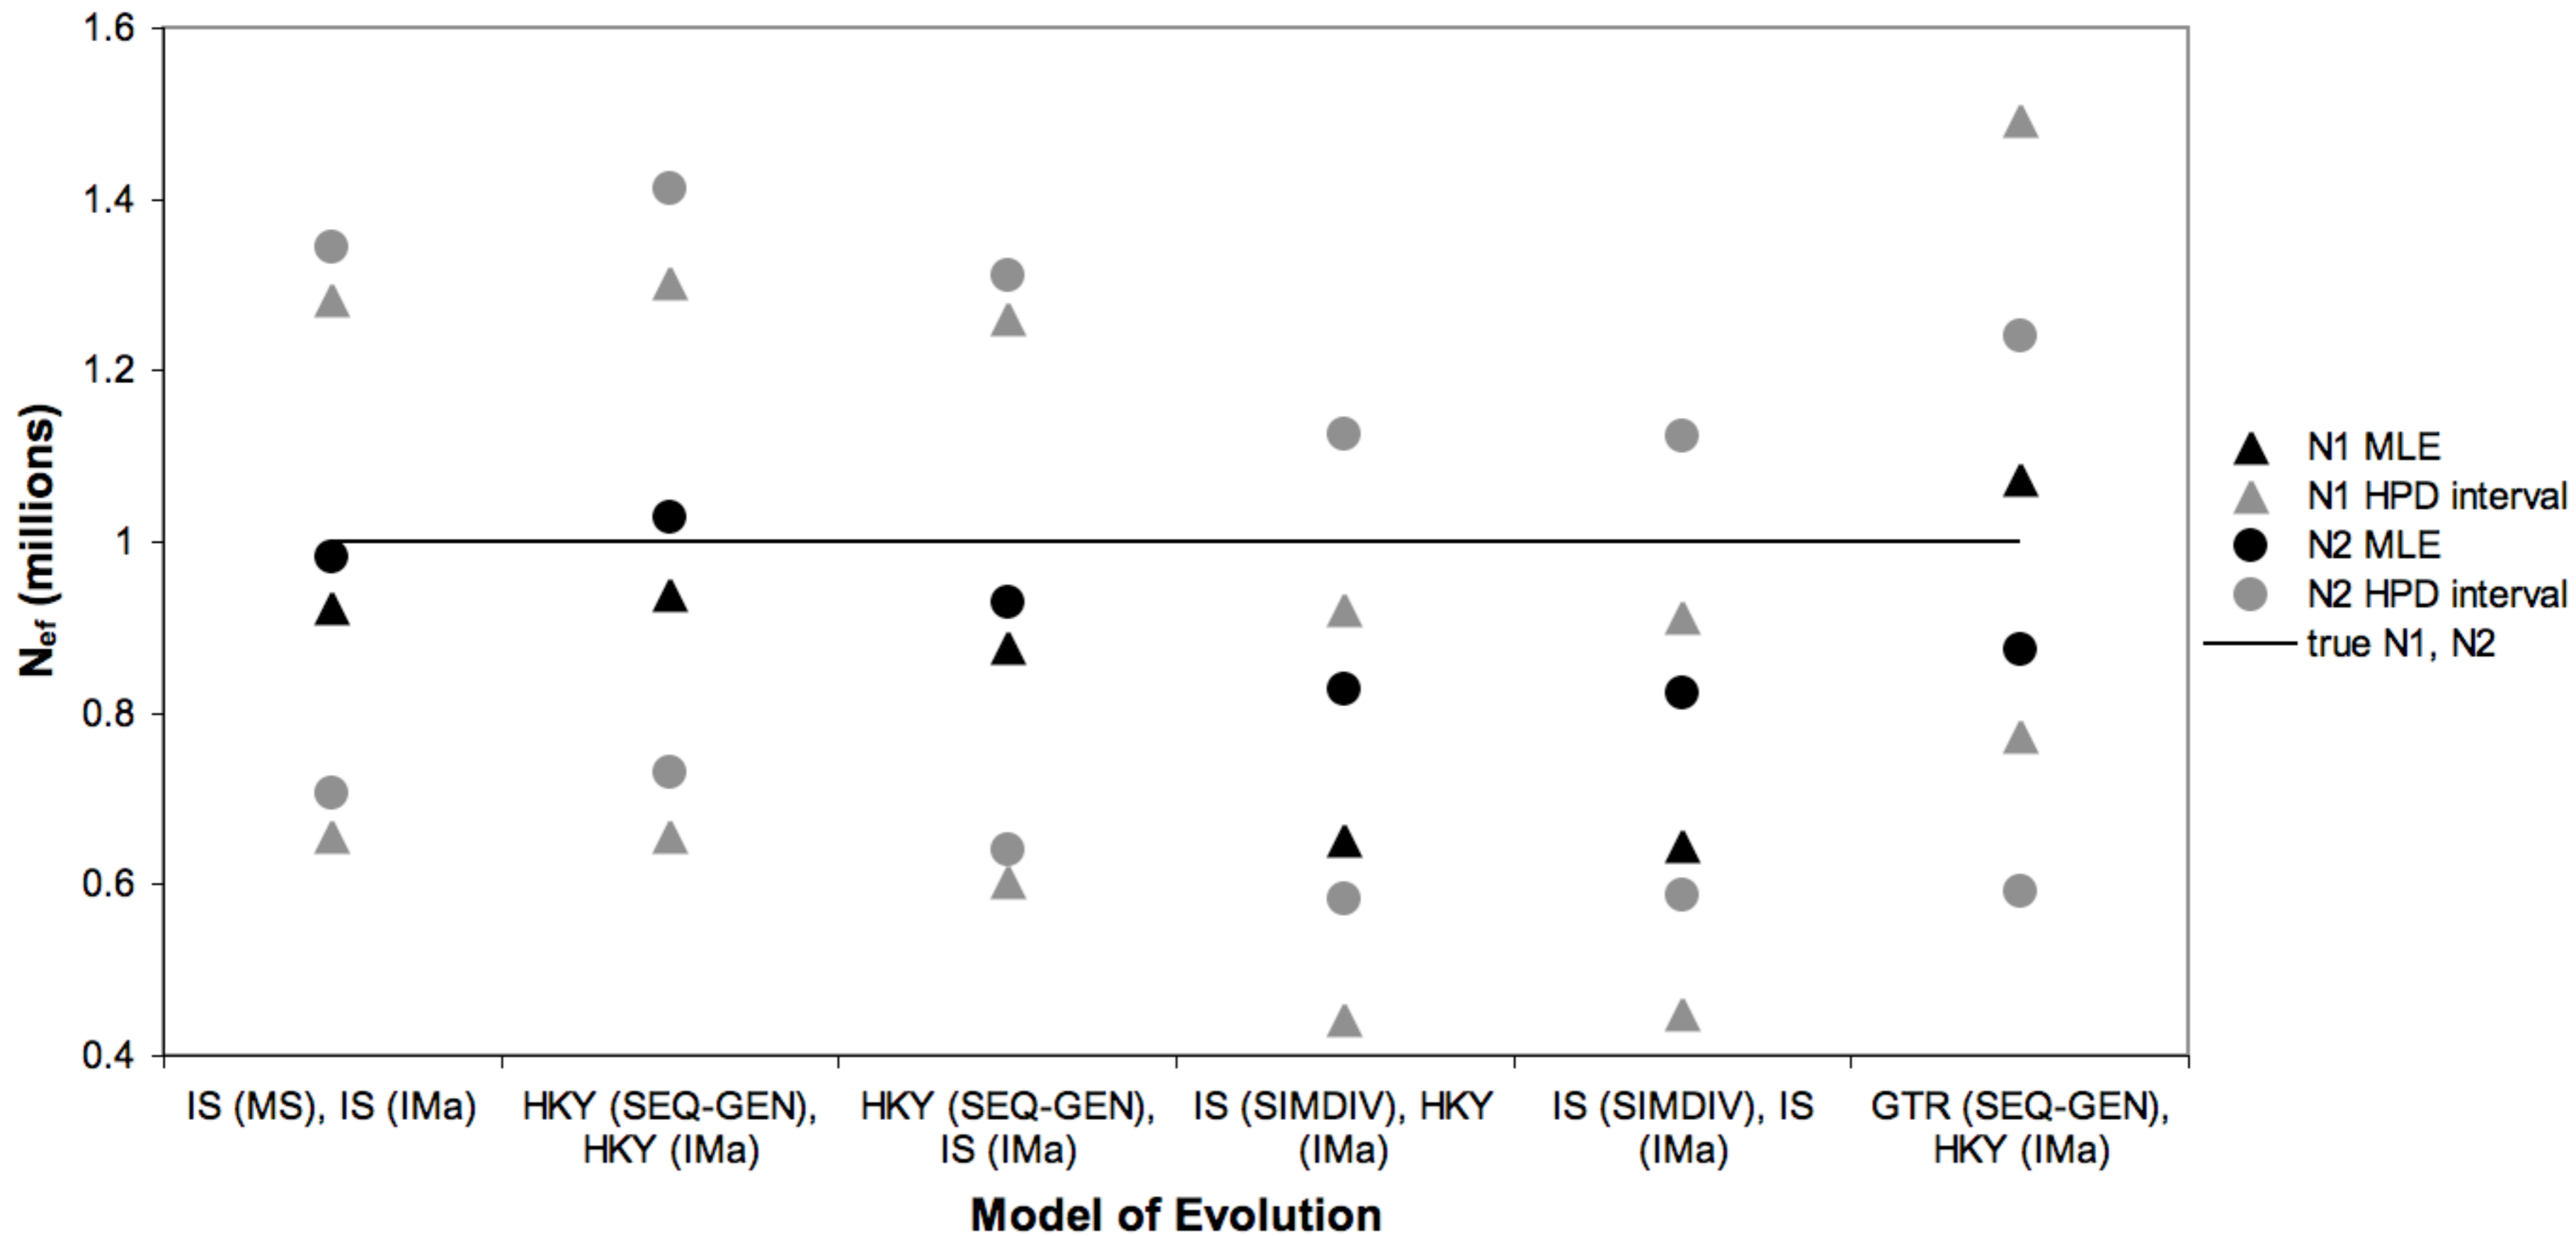

# Ancestral Effective Population Size, IS vs. HKY vs. GTR Evolution

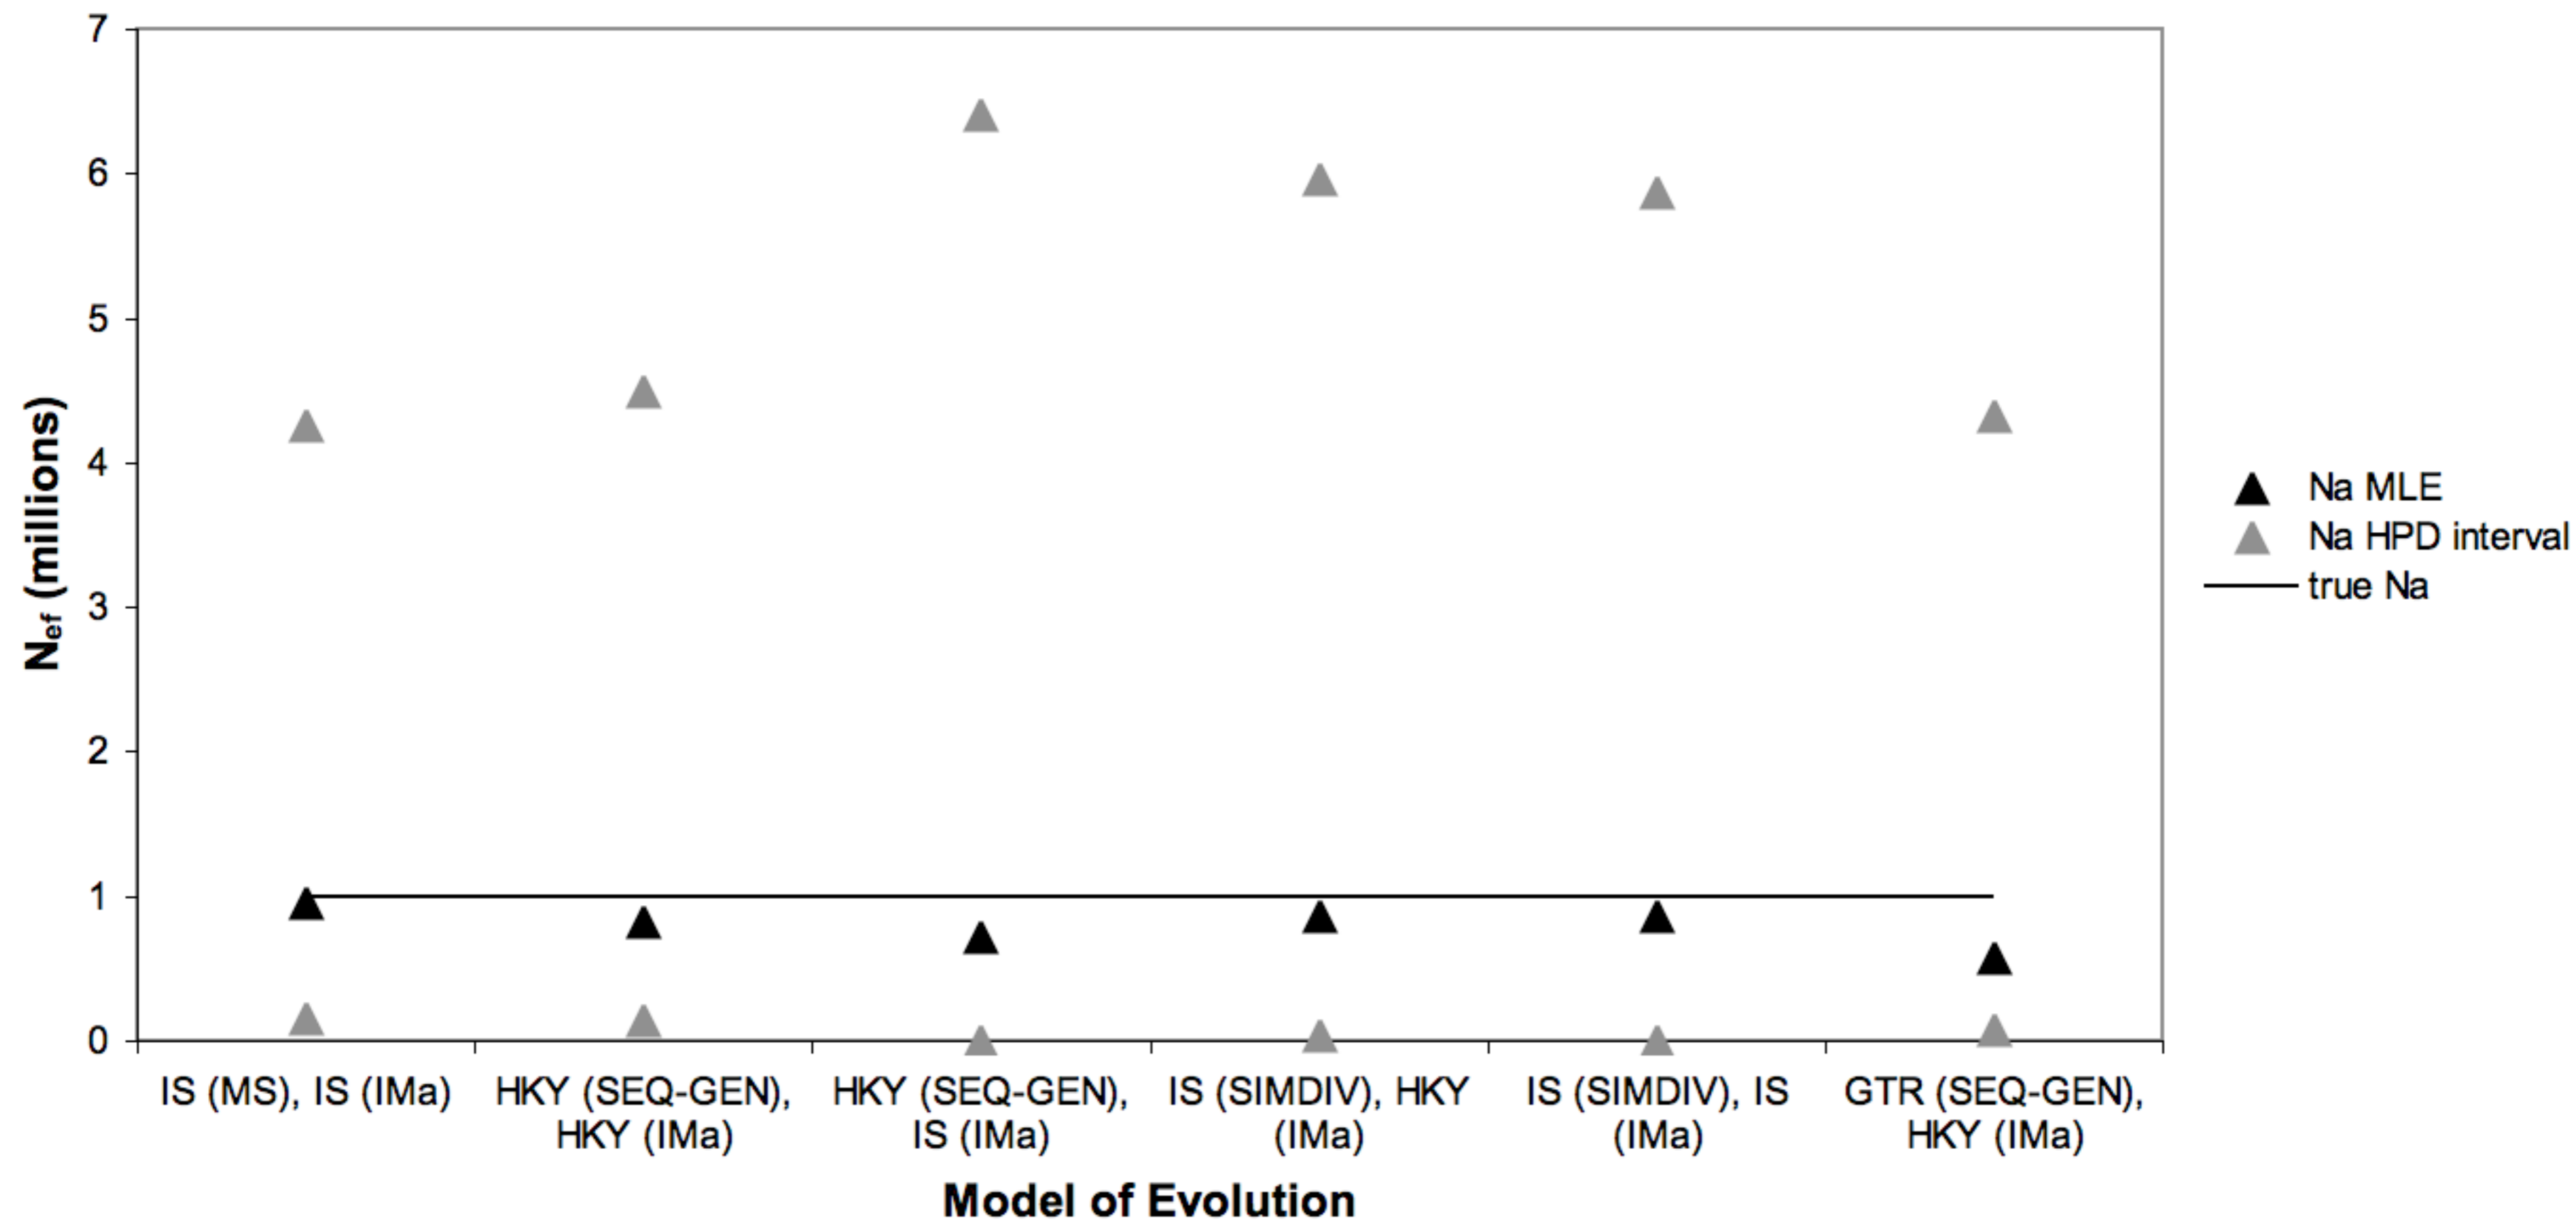

# Divergence Time, IS vs. HKY vs. GTR Evolution

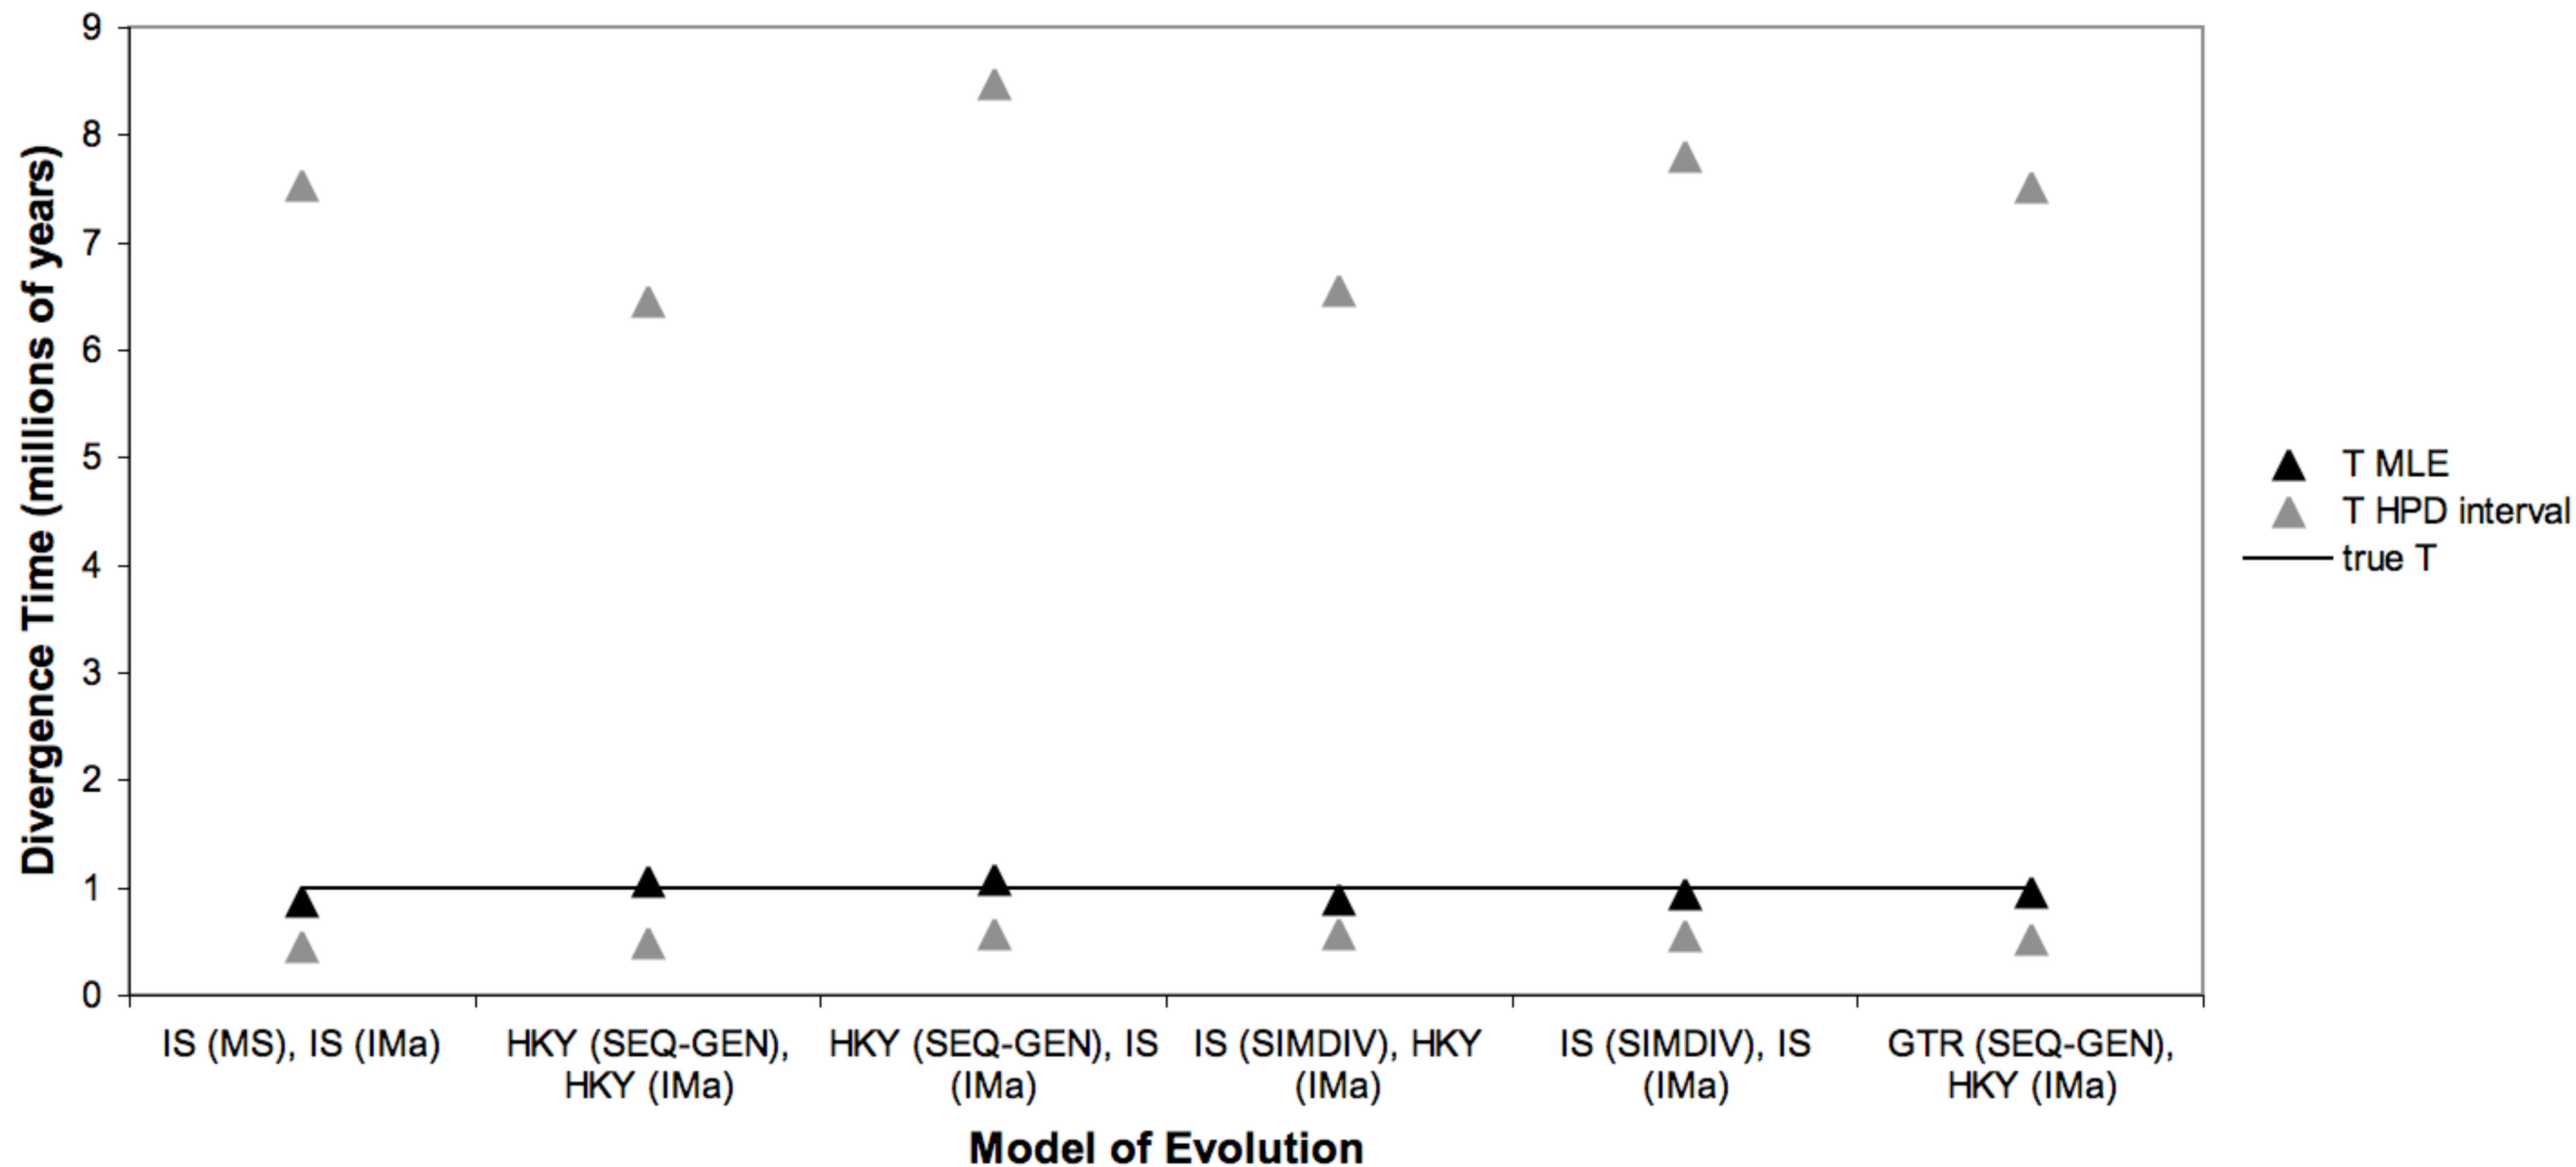

# Gene Flow Rates, IS vs. HKY vs. GTR Evolution

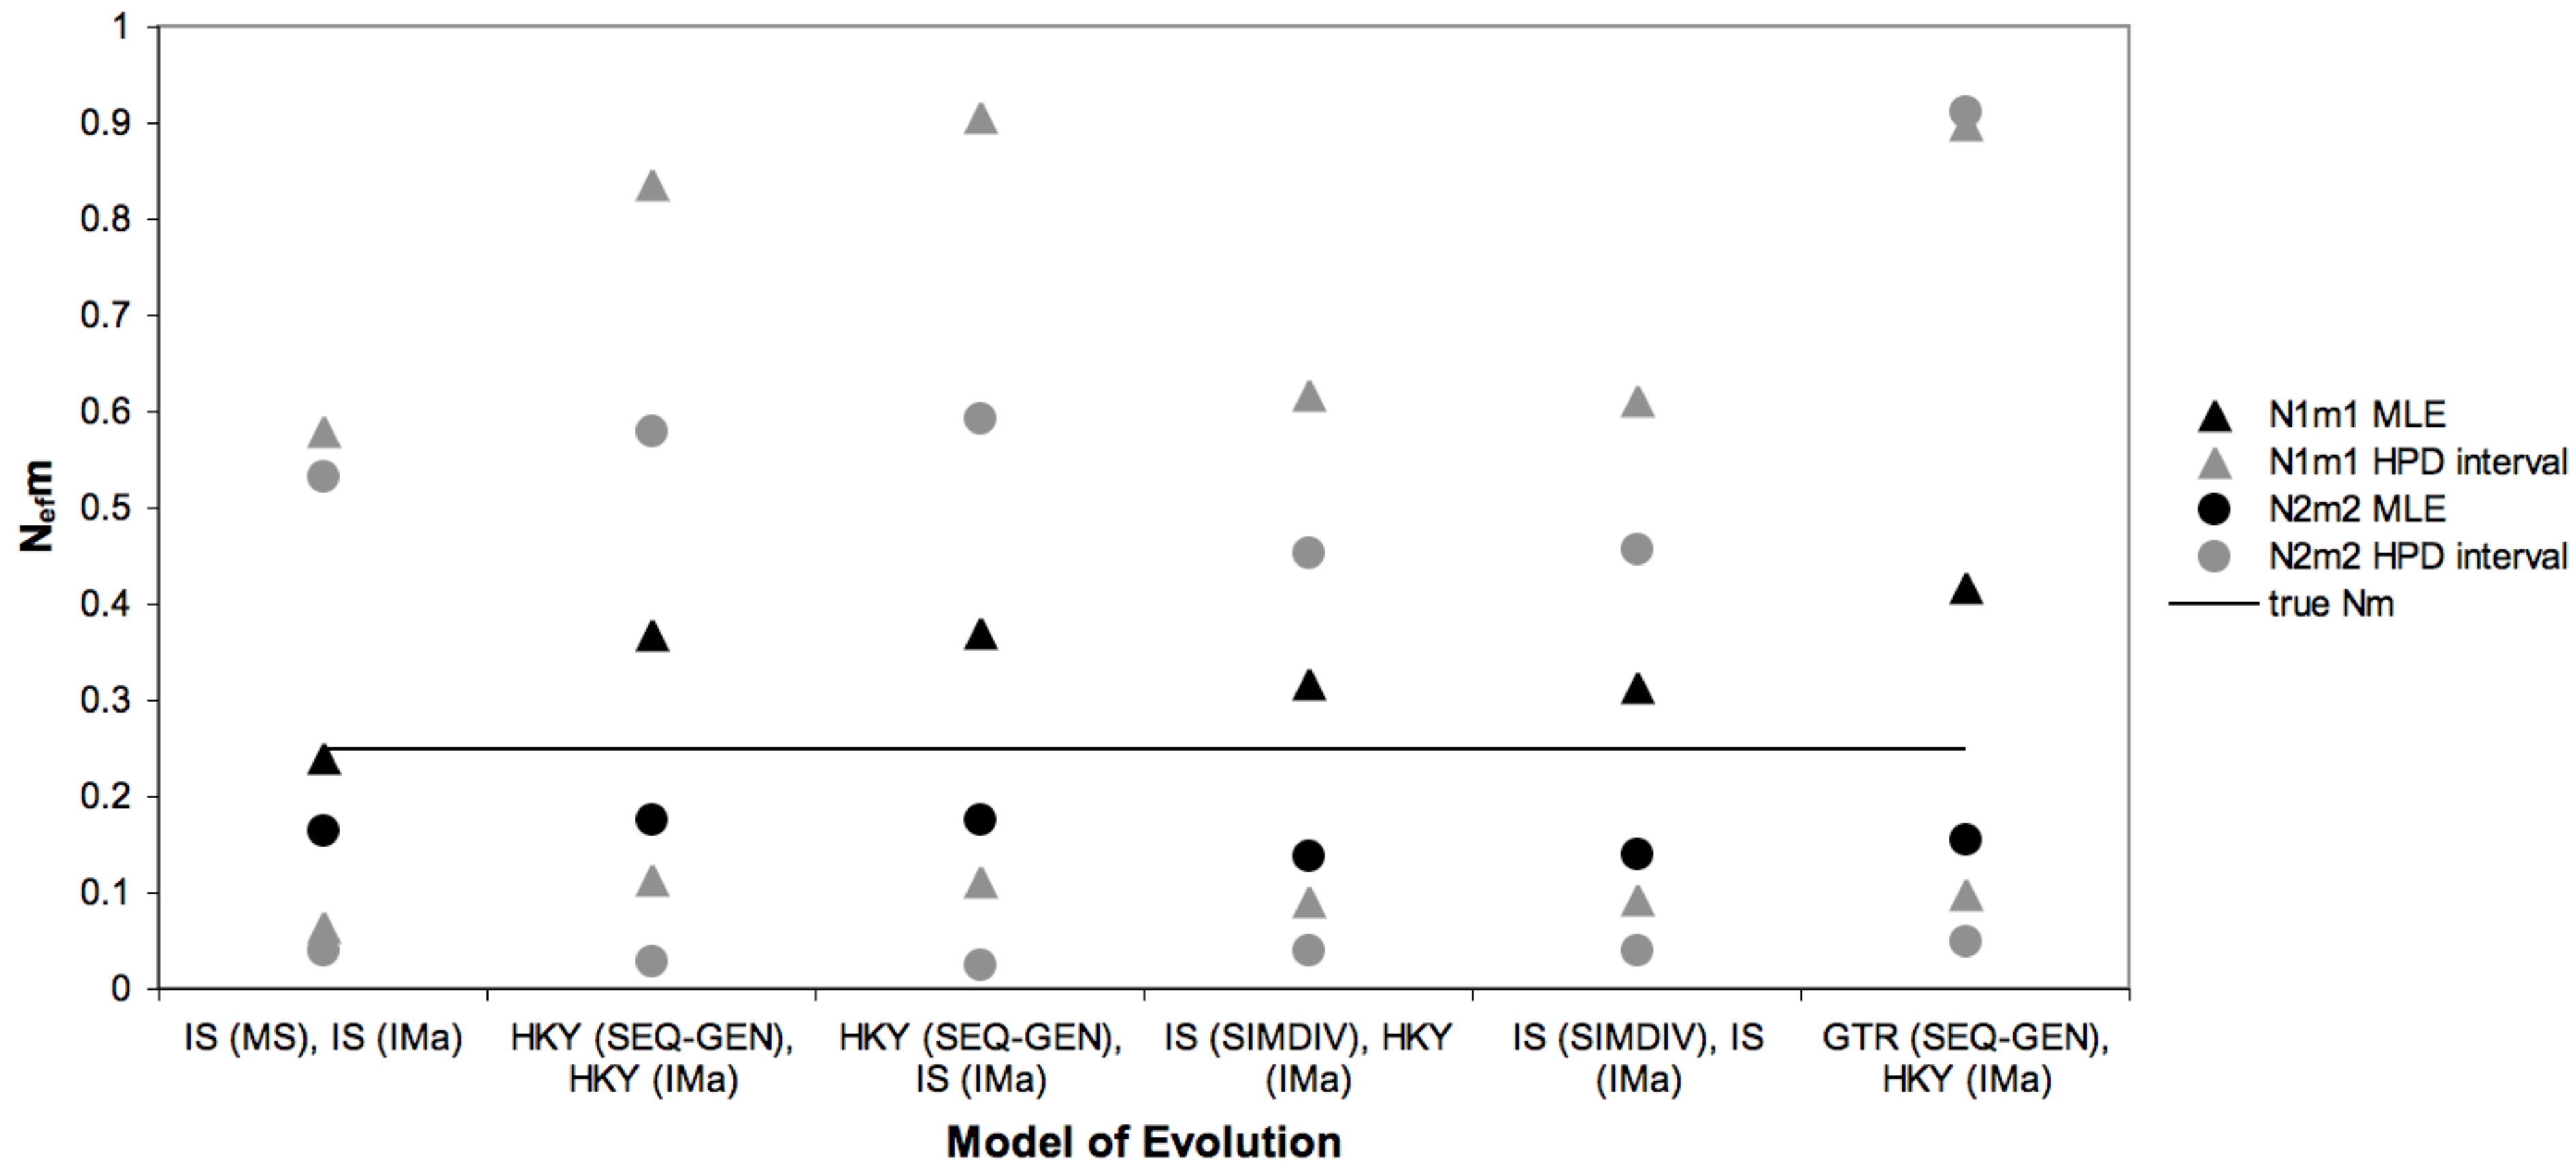

# Percent Coefficient of Variation, IS vs. HKY vs. GTR Evolution

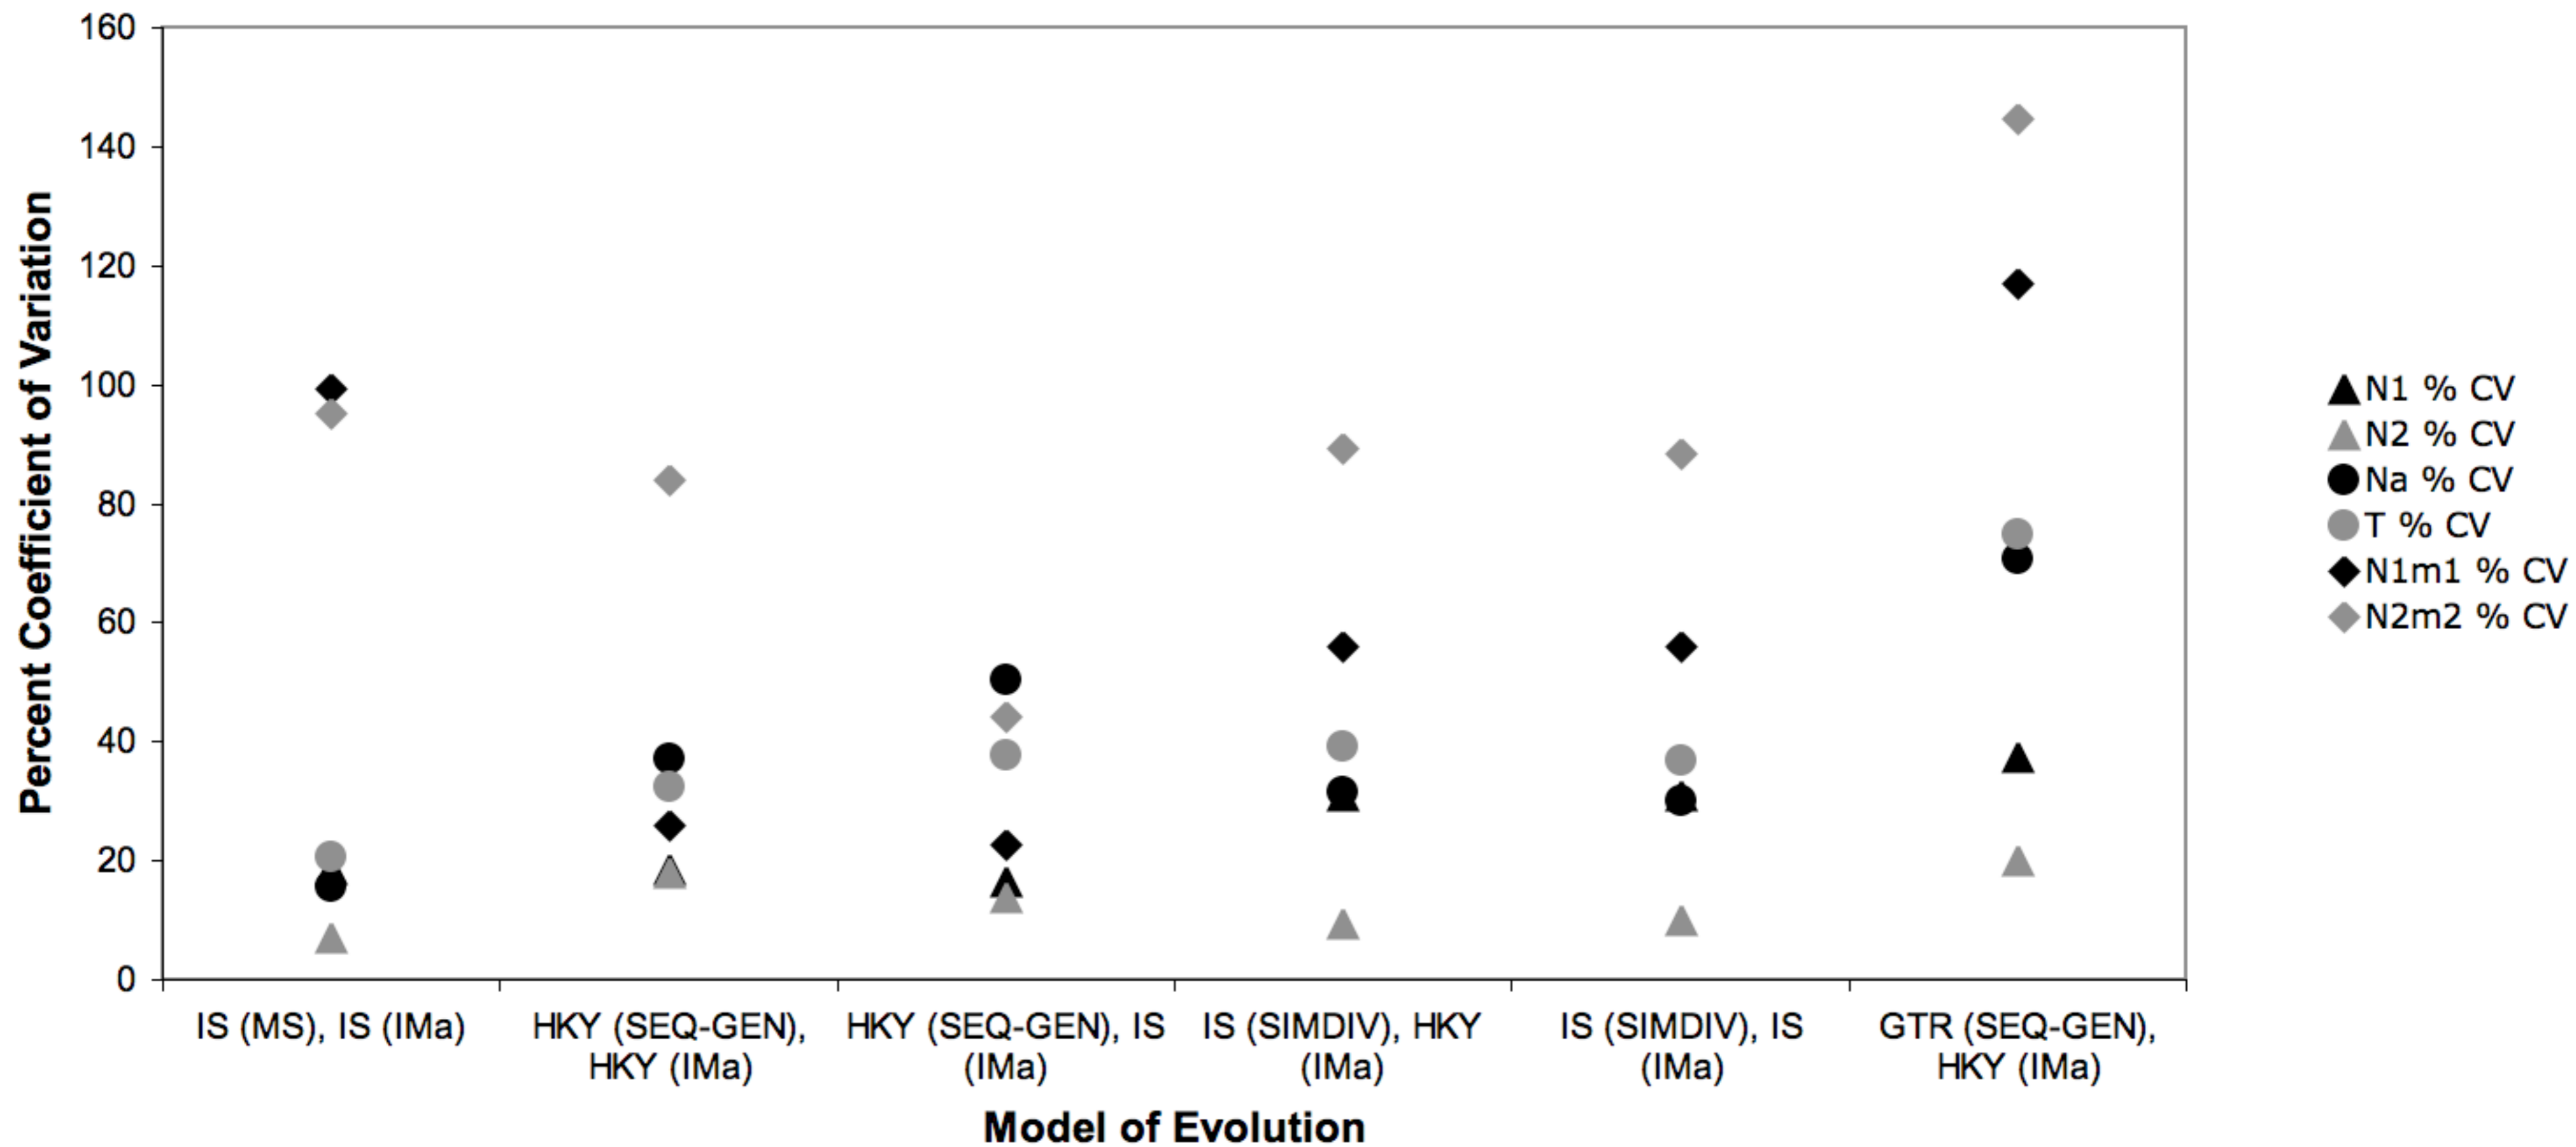

# Current Effective Population Sizes with Recombination

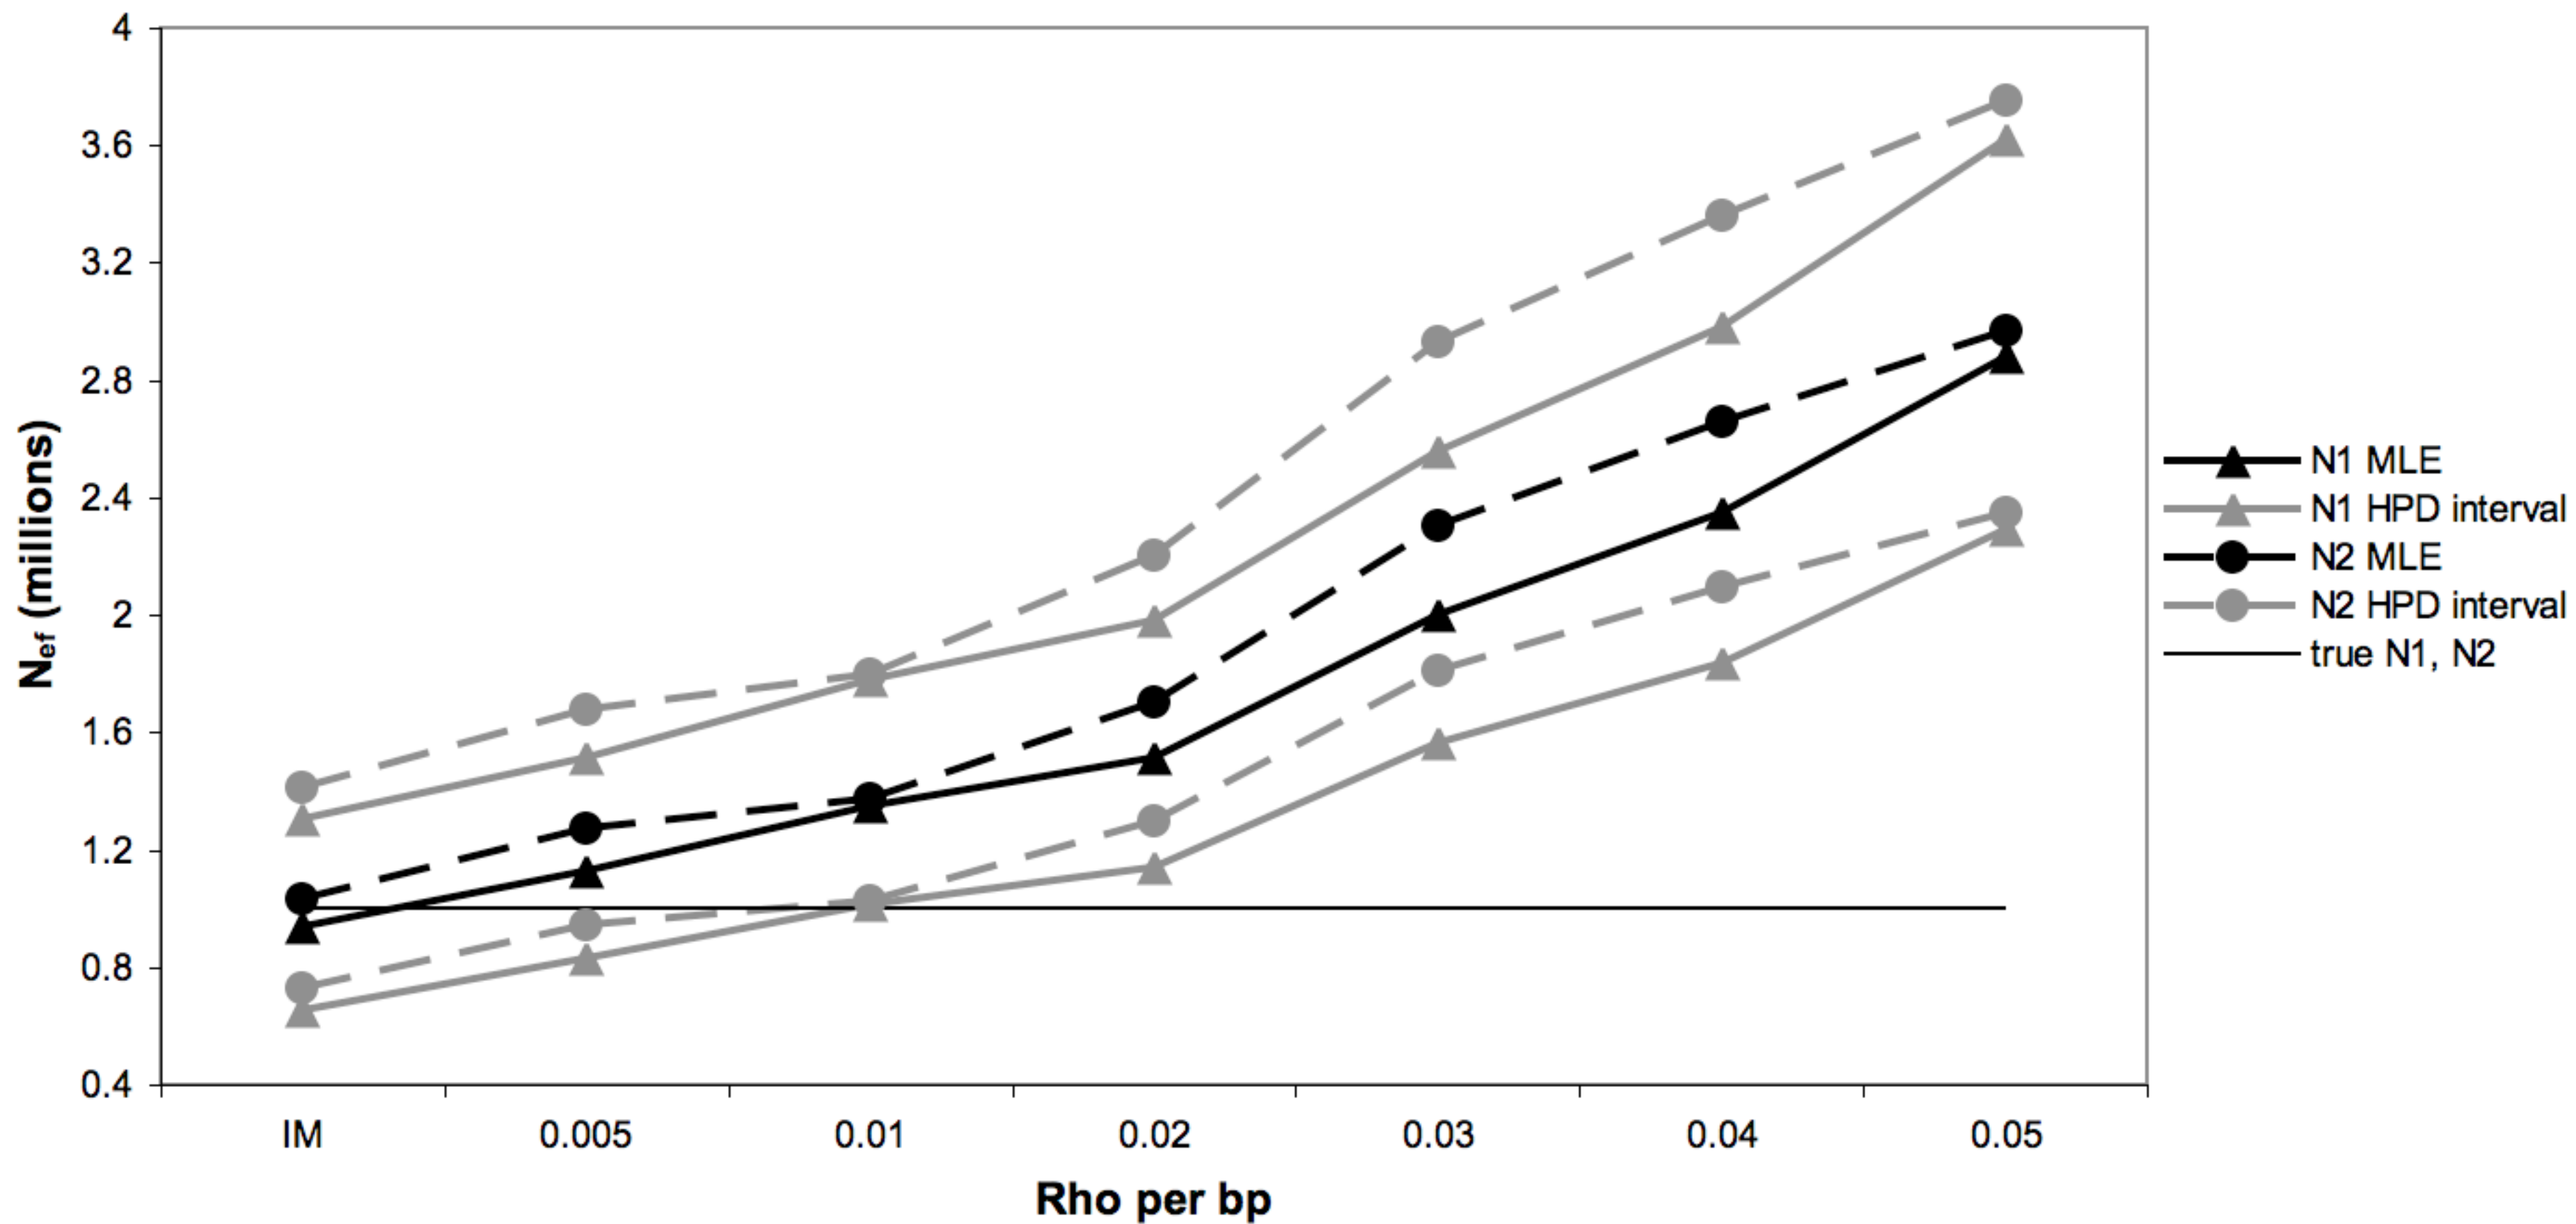

# Ancestral Effective Population Size with Recombination

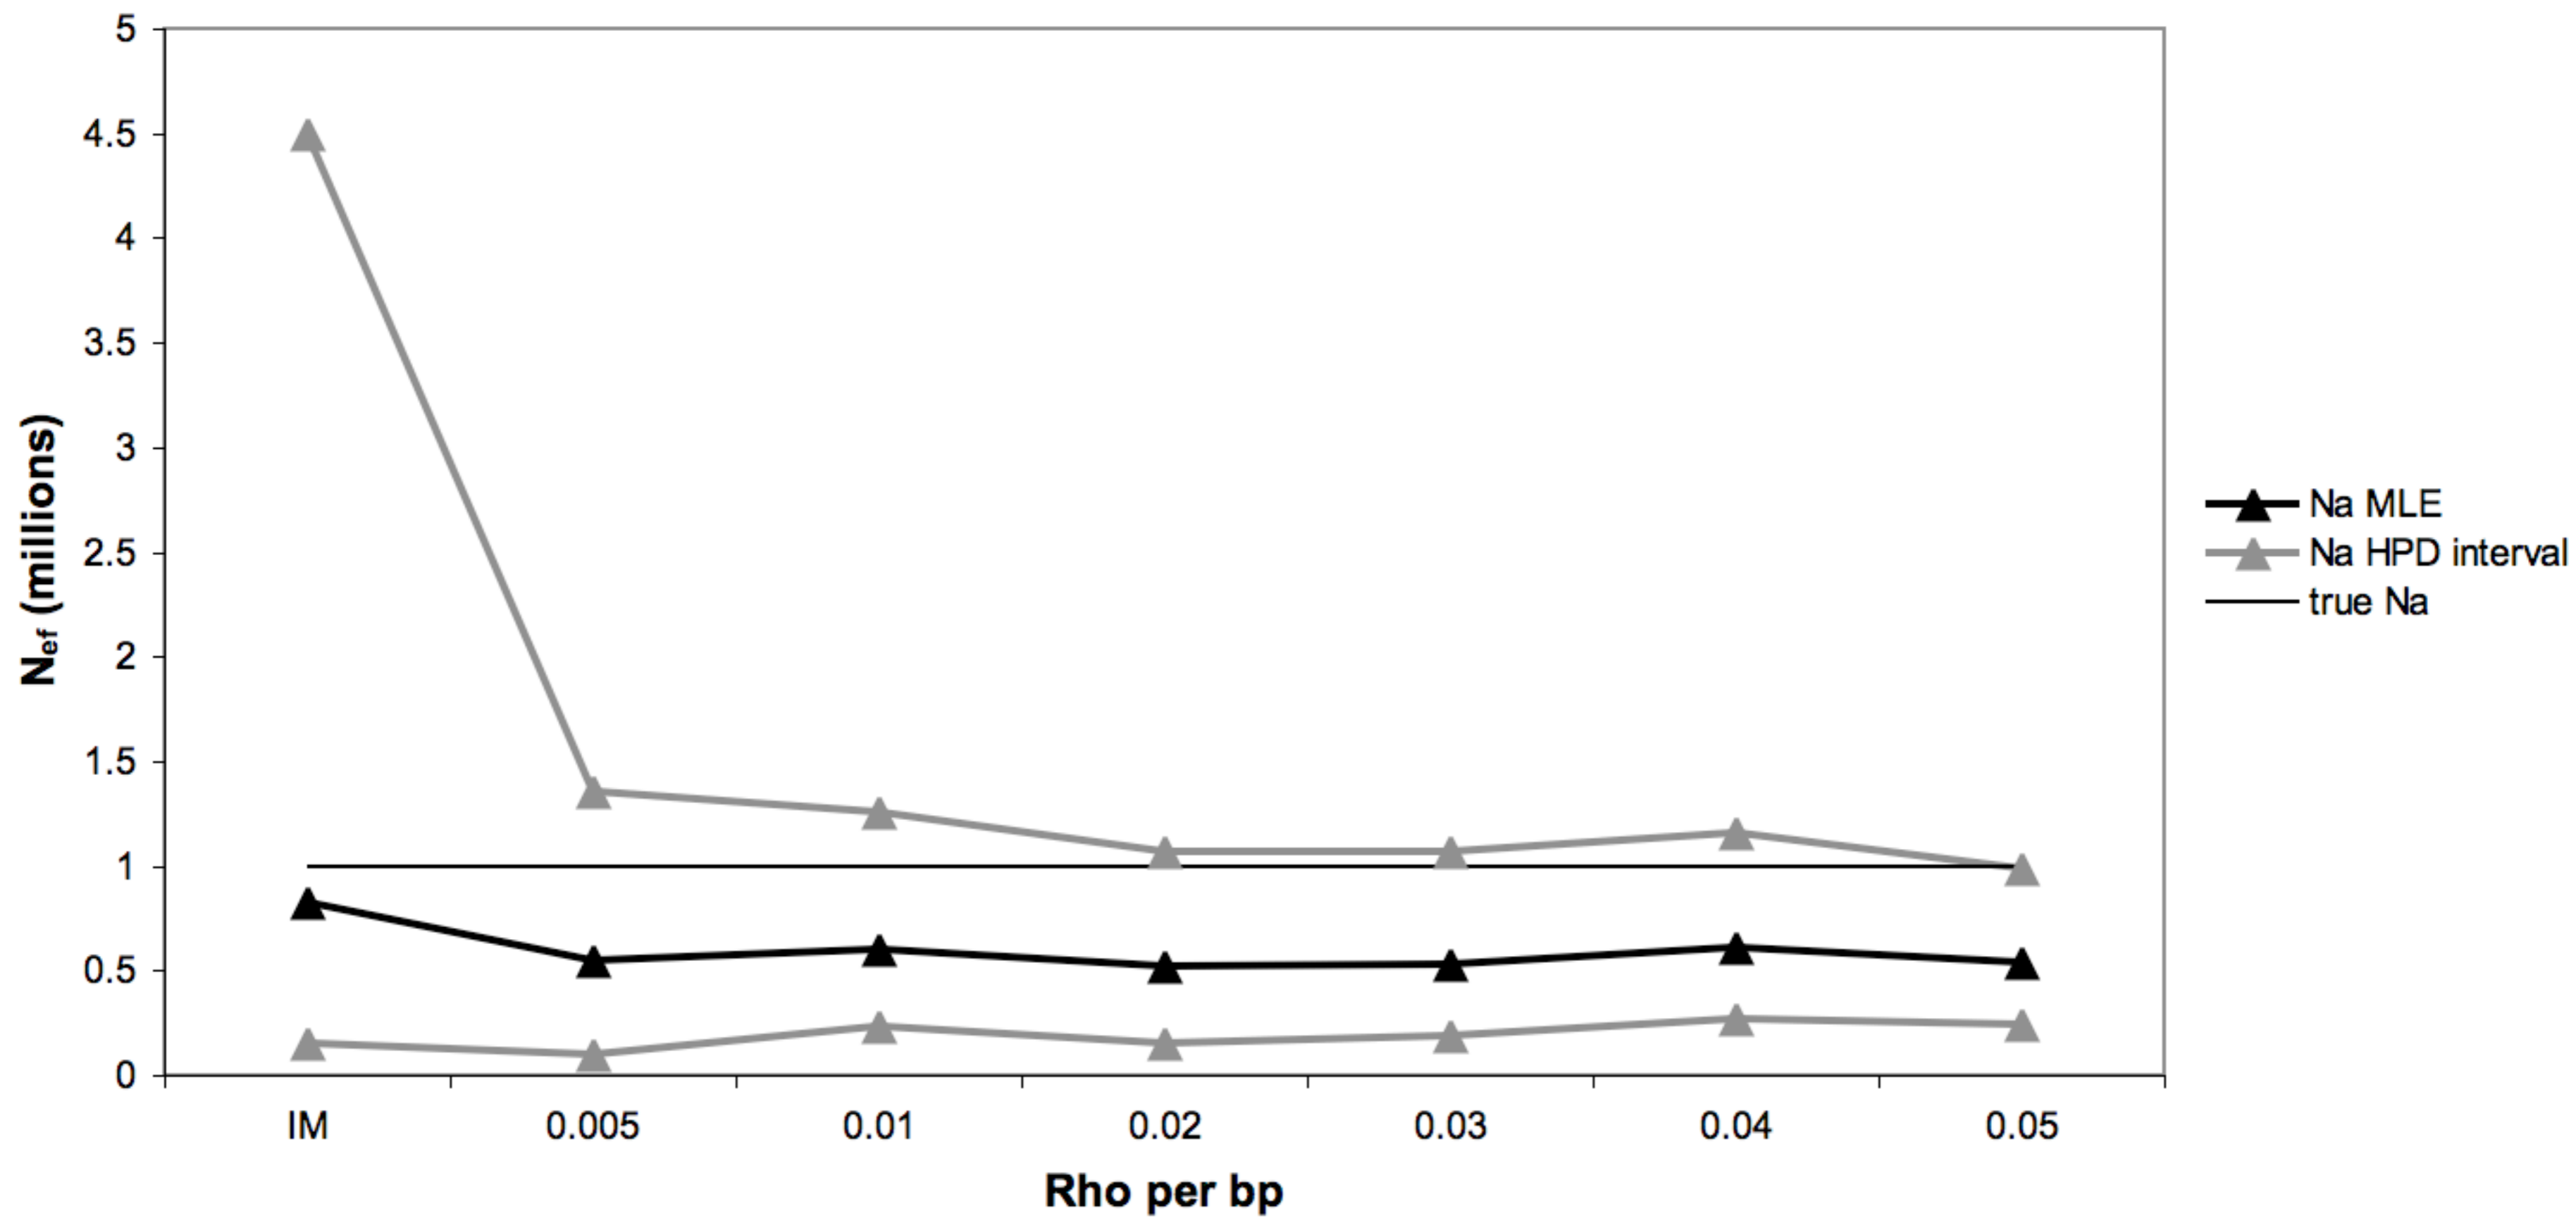



# Divergence Time with Recombination

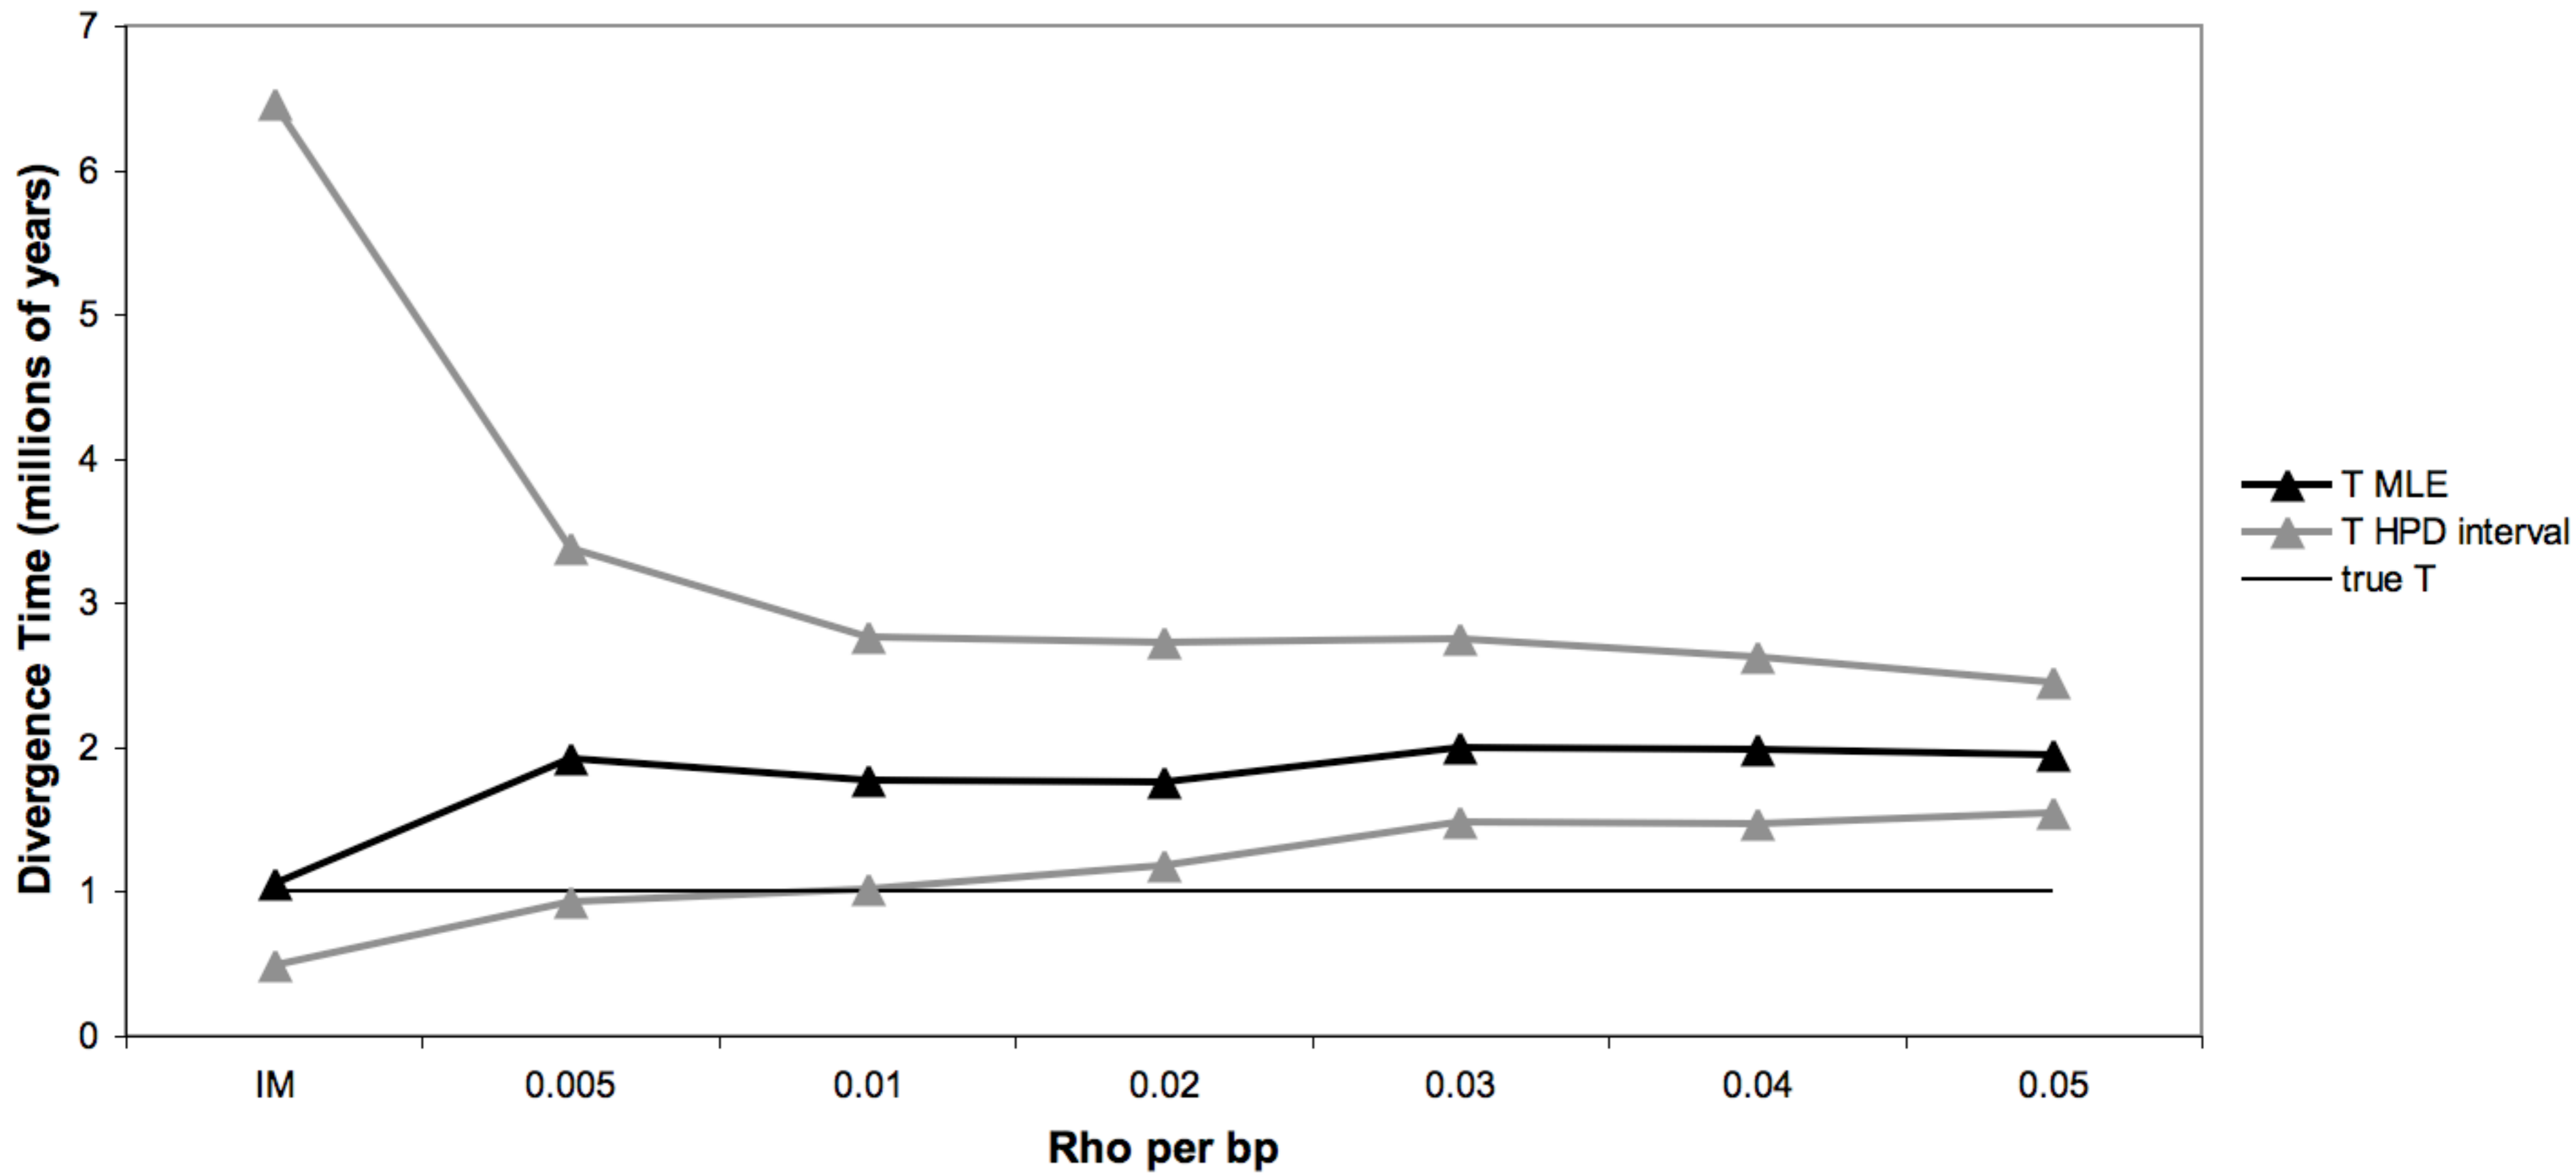

# Gene Flow Rates with Recombination

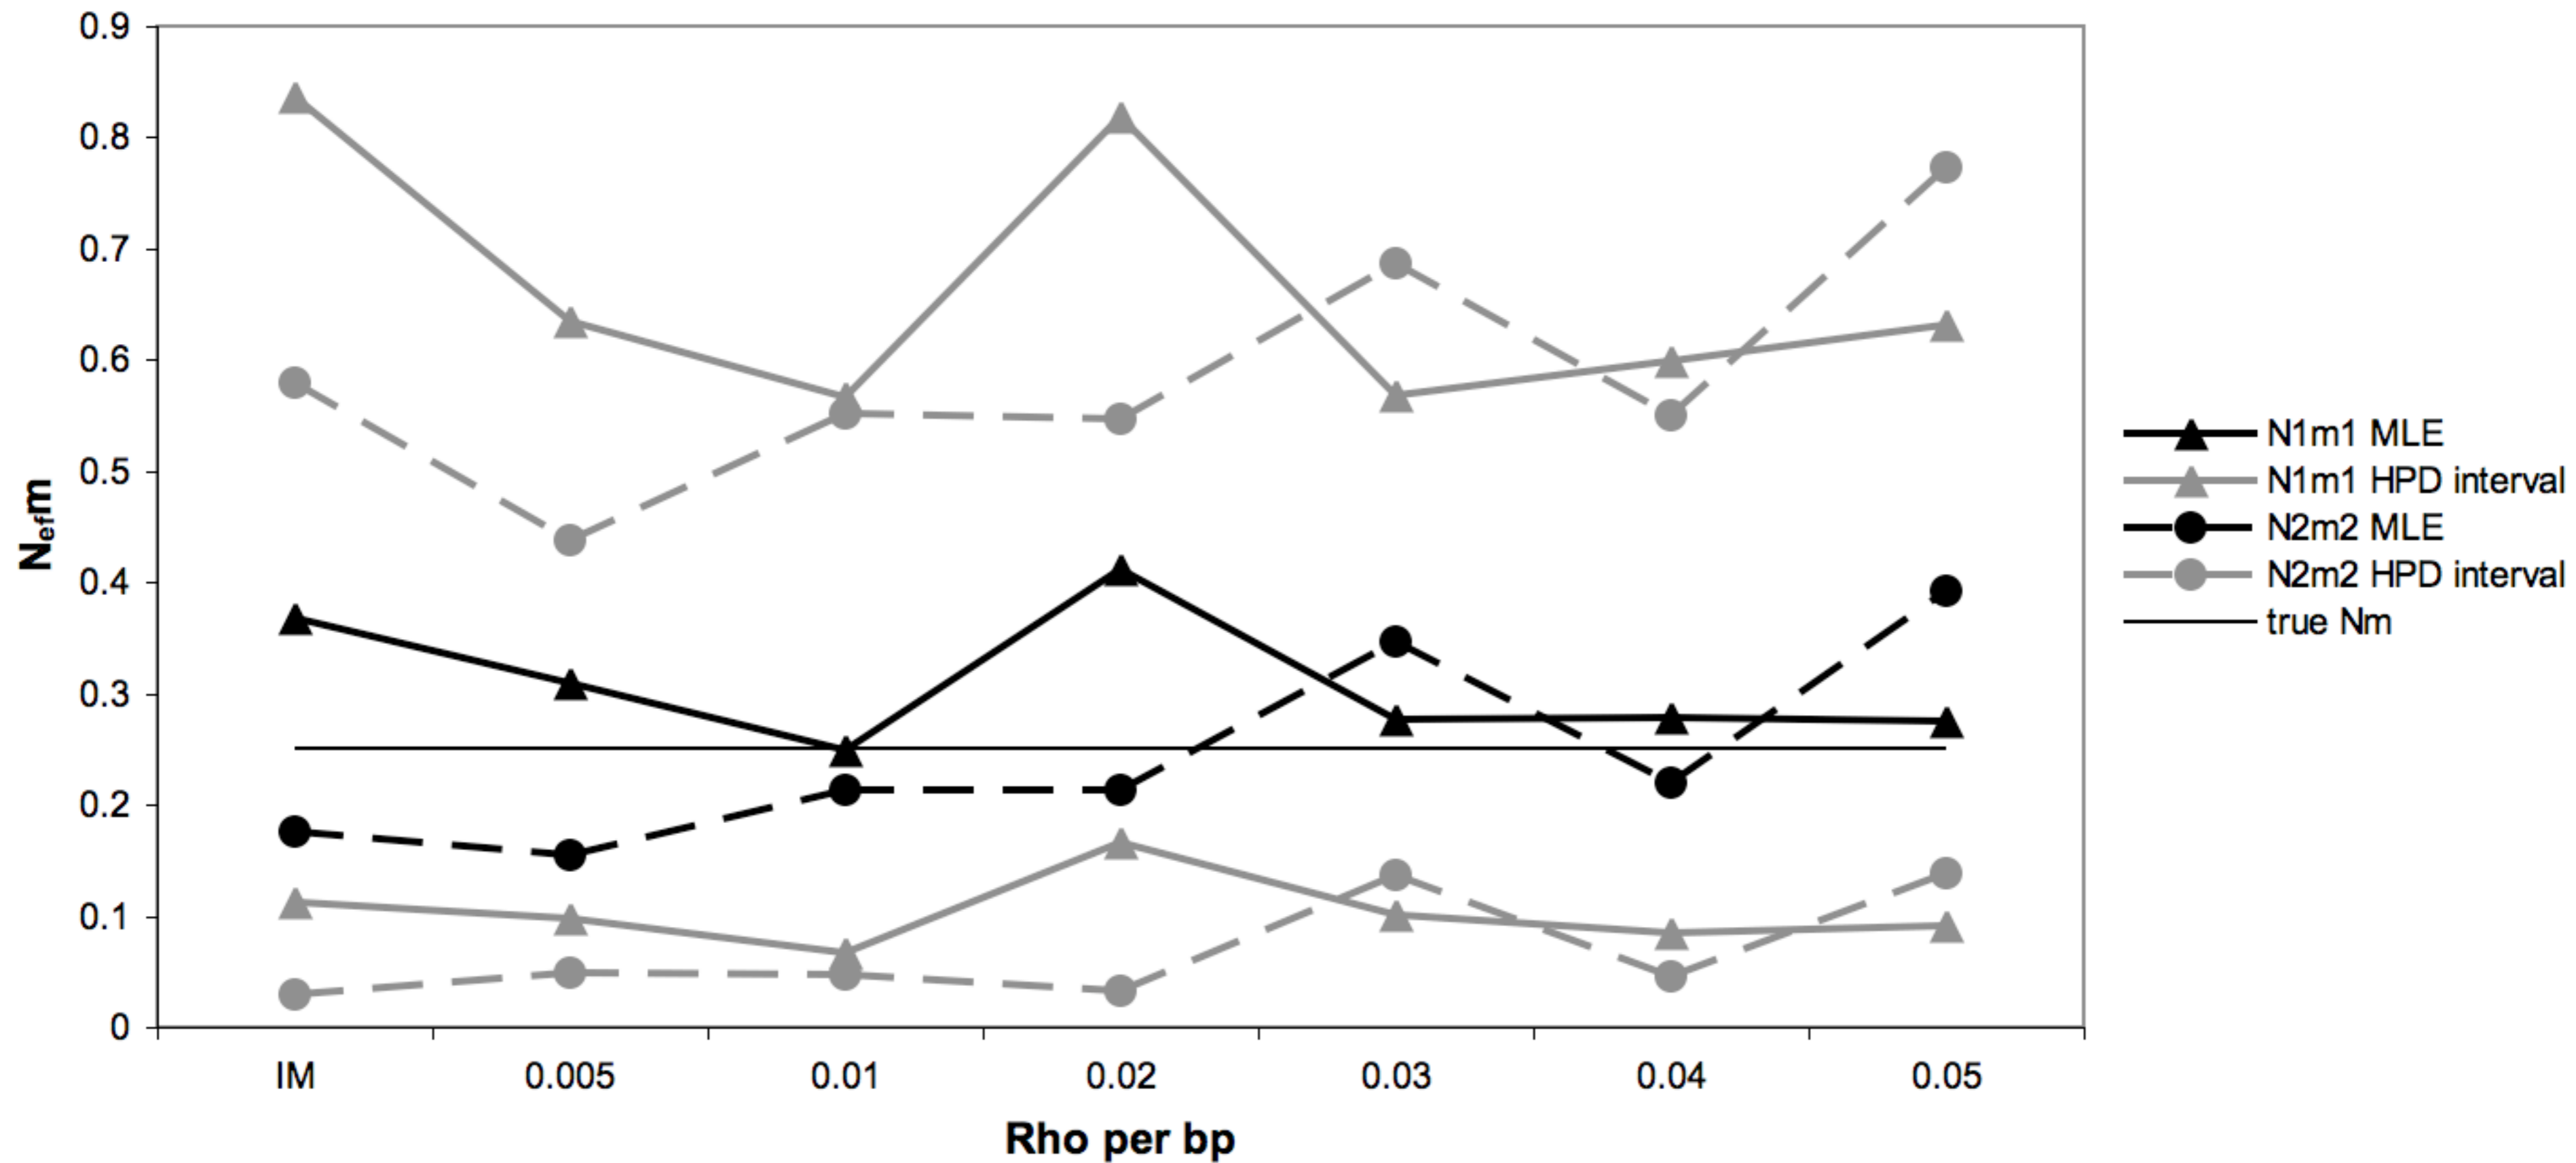

# Percent Coefficient of Variation, Recombination

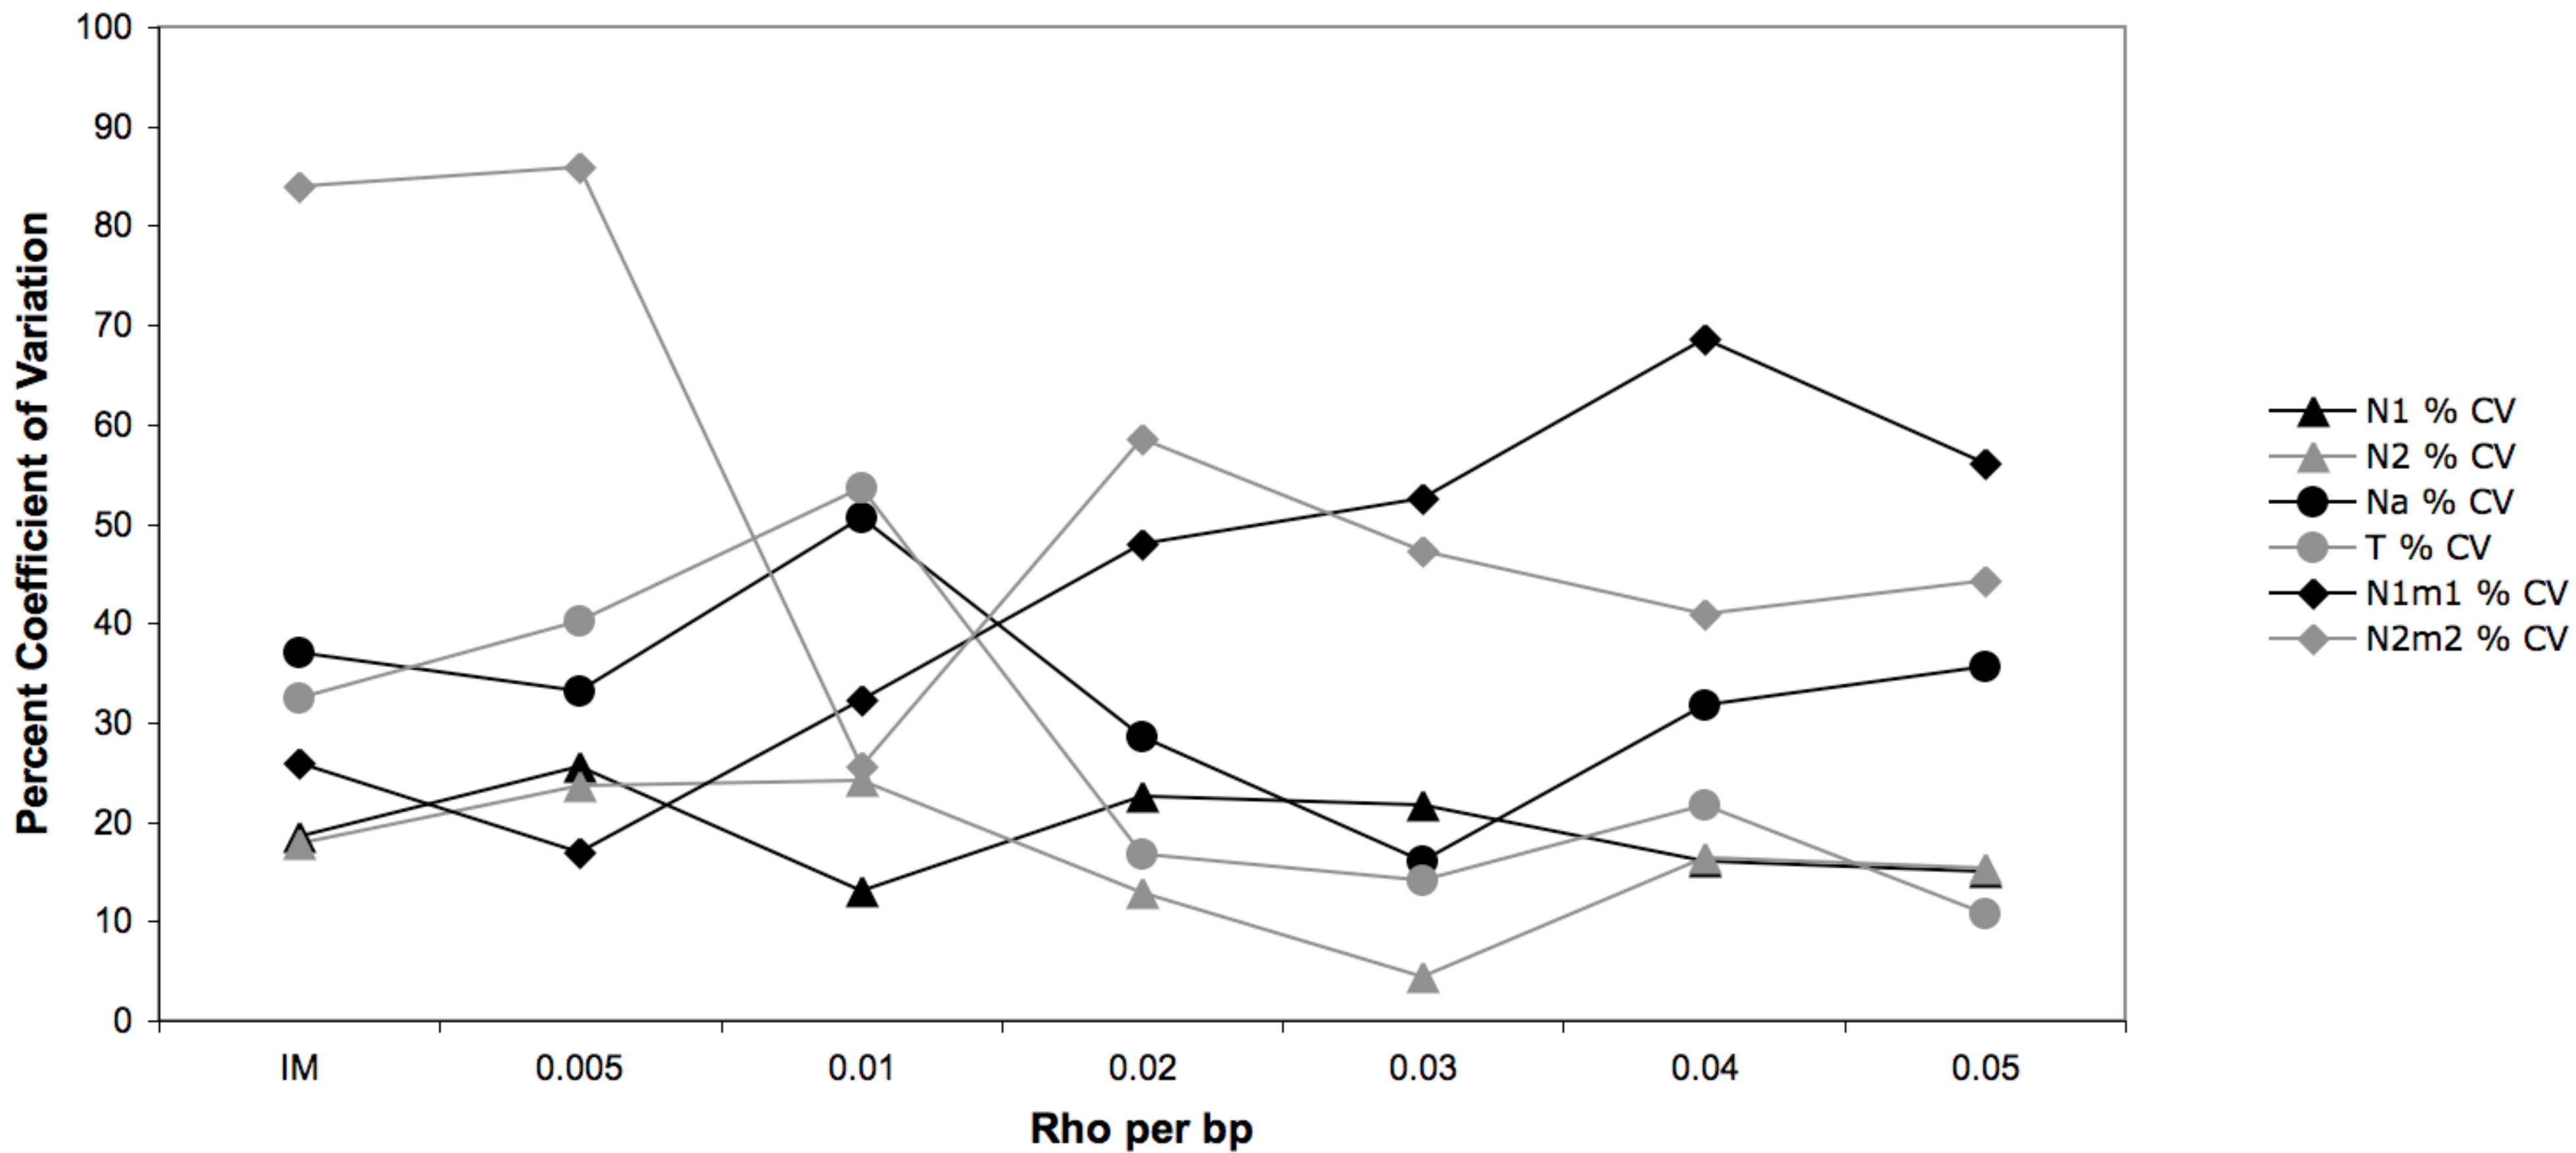

# Current Effective Population Sizes, HKY Non-Recombining Blocks

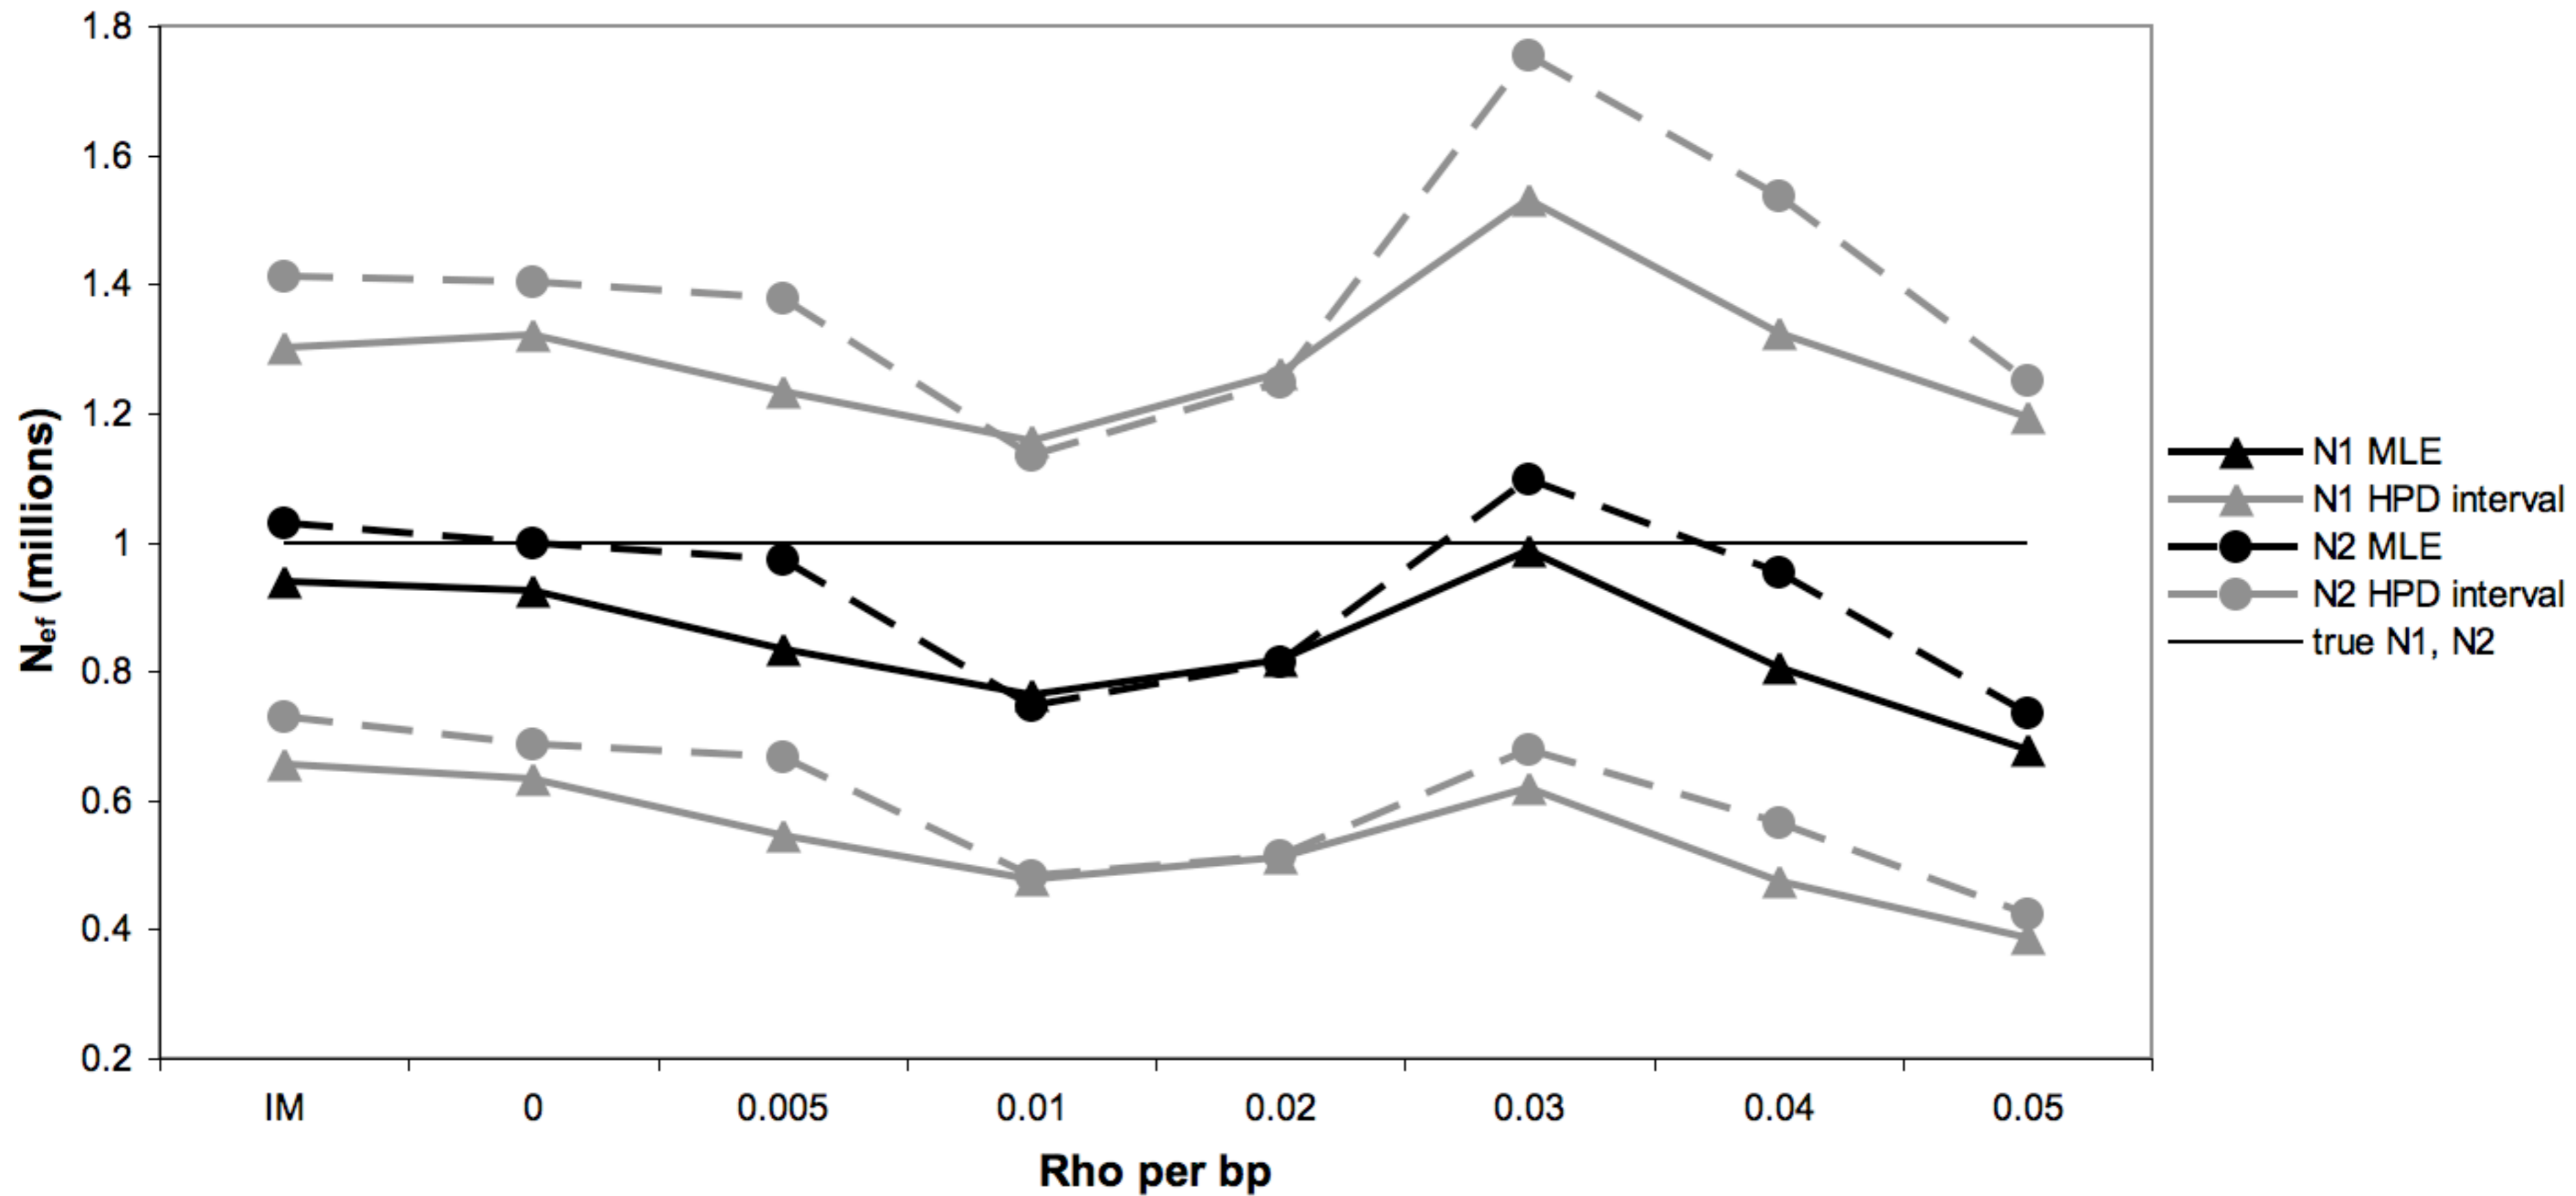

# Ancestral Effective Population Size, HKY Non-Recombining Blocks

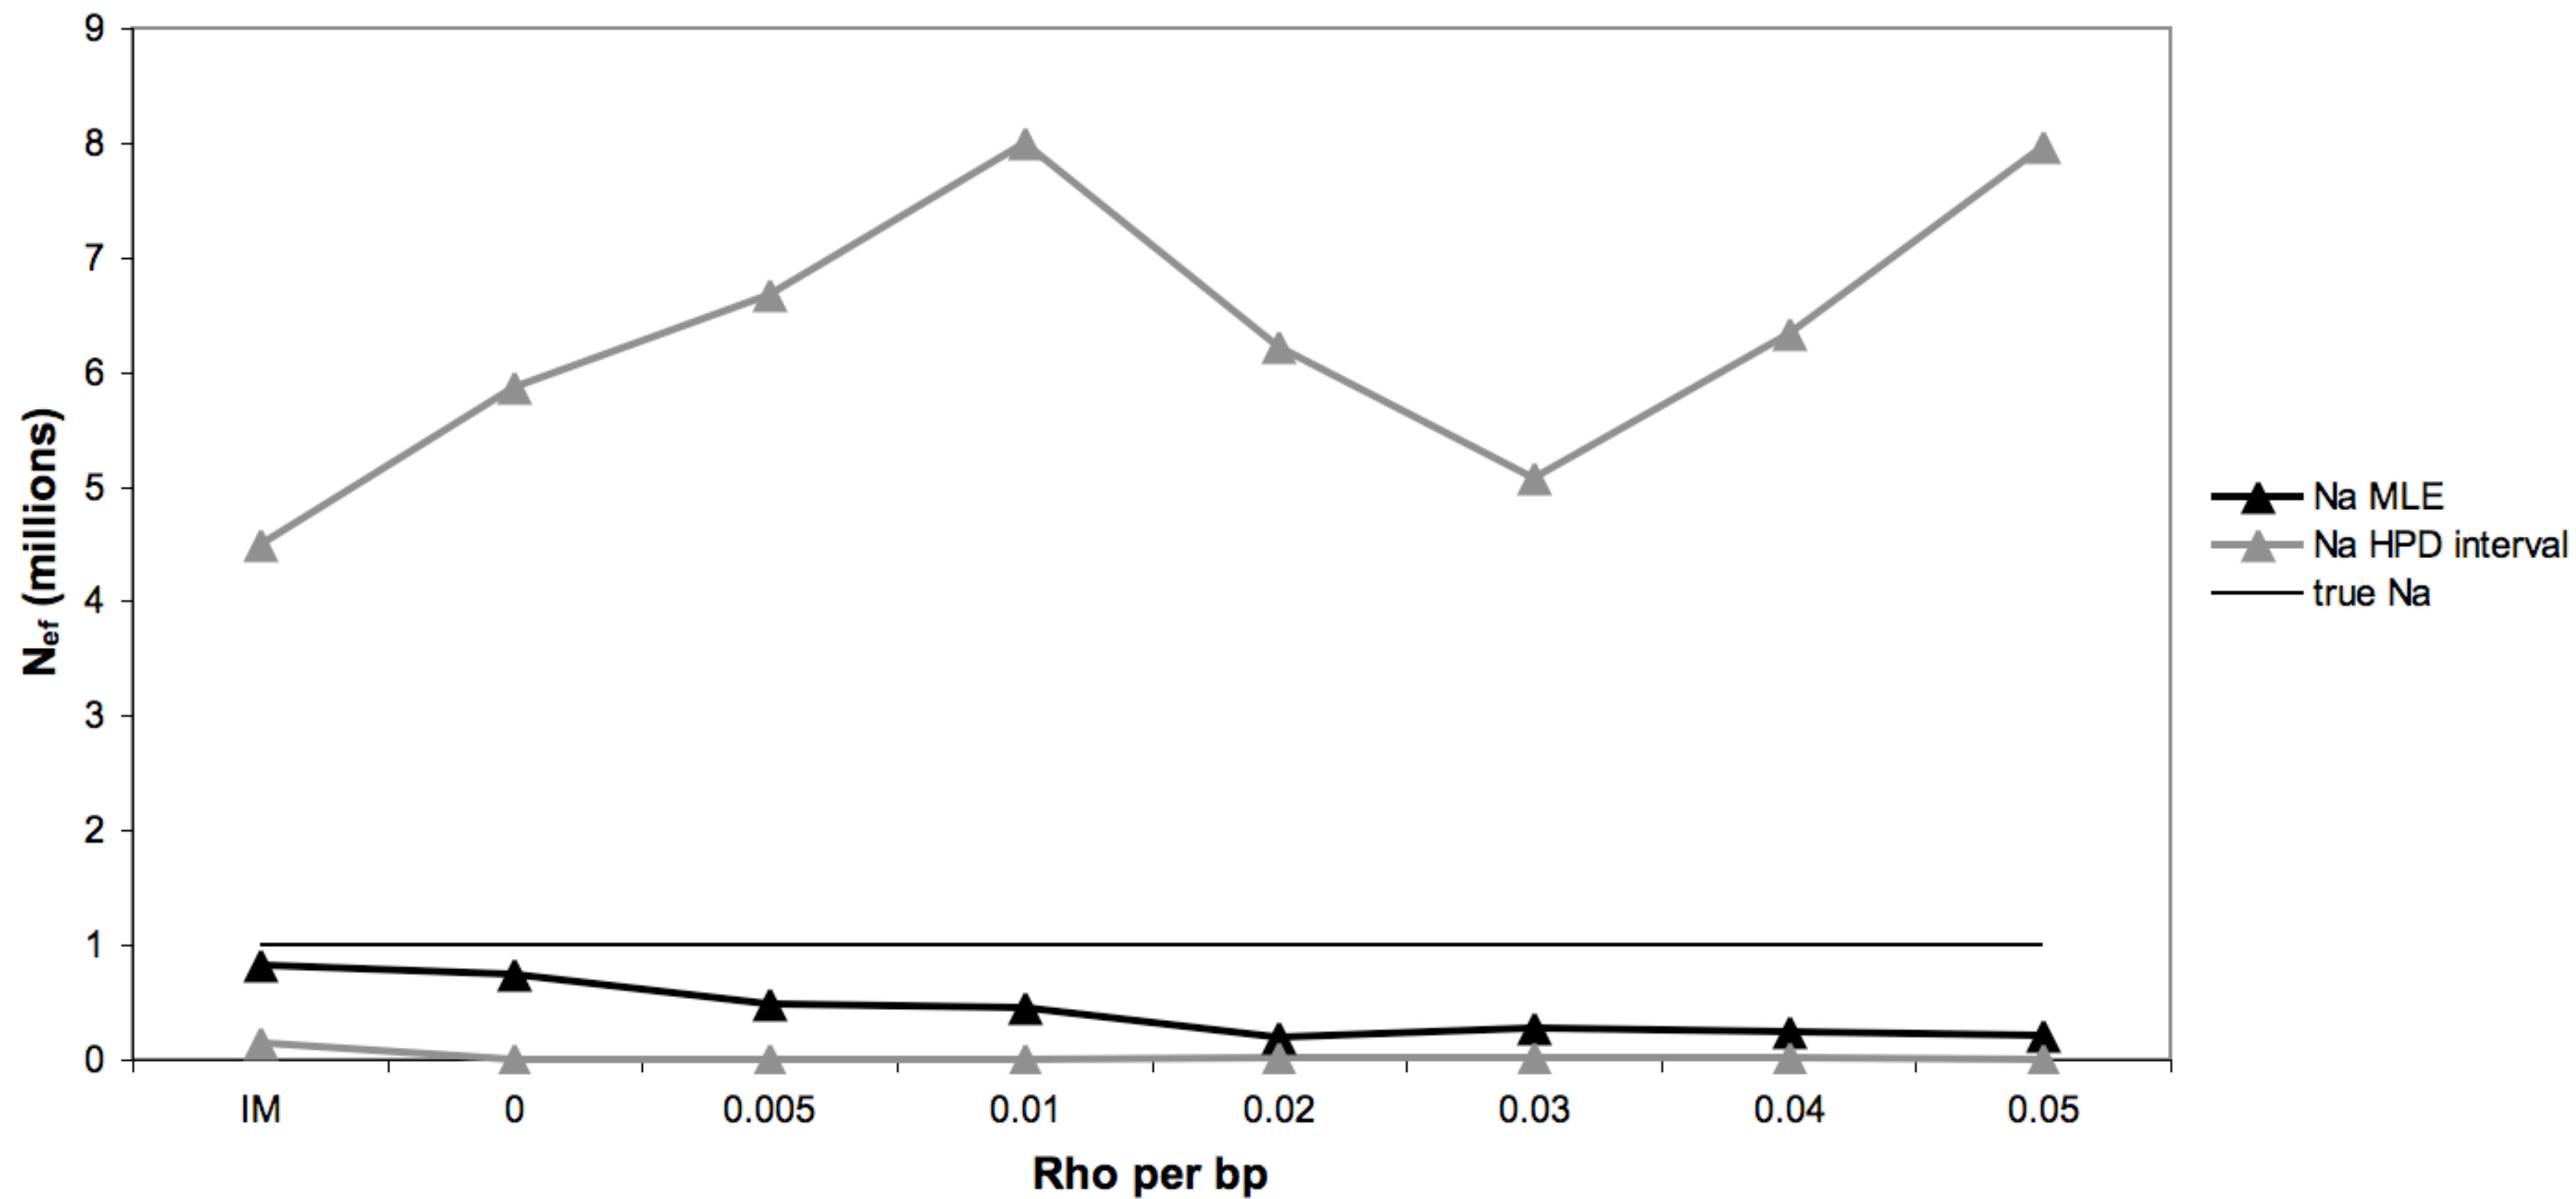

# Divergence Time, HKY Non-Recombining Blocks

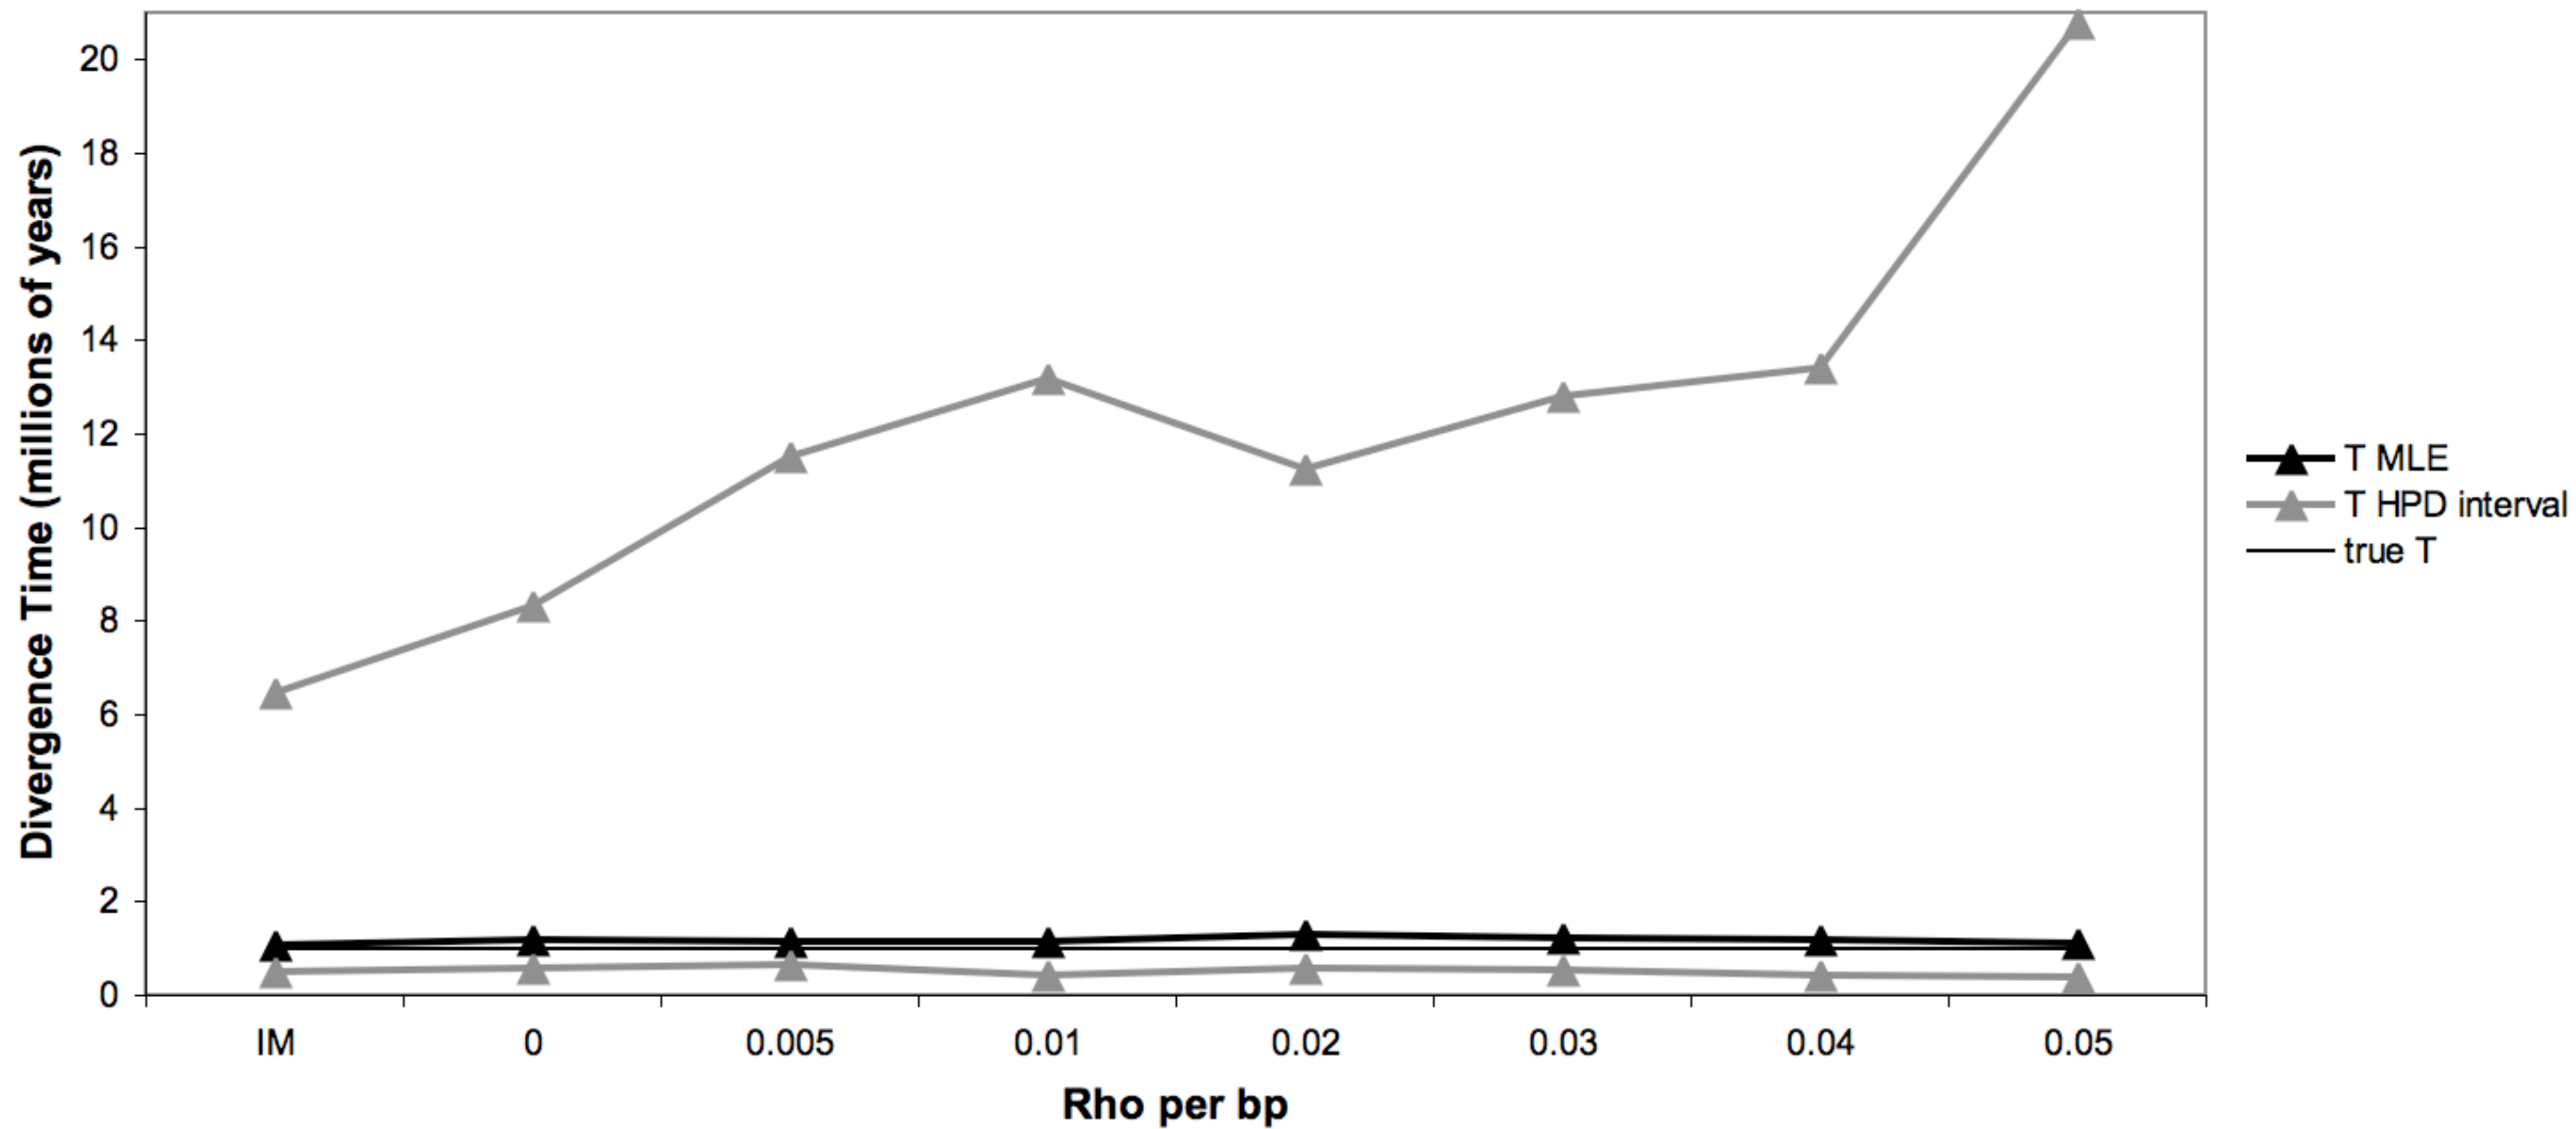

# Gene Flow Rates, HKY Non-Recombining Blocks

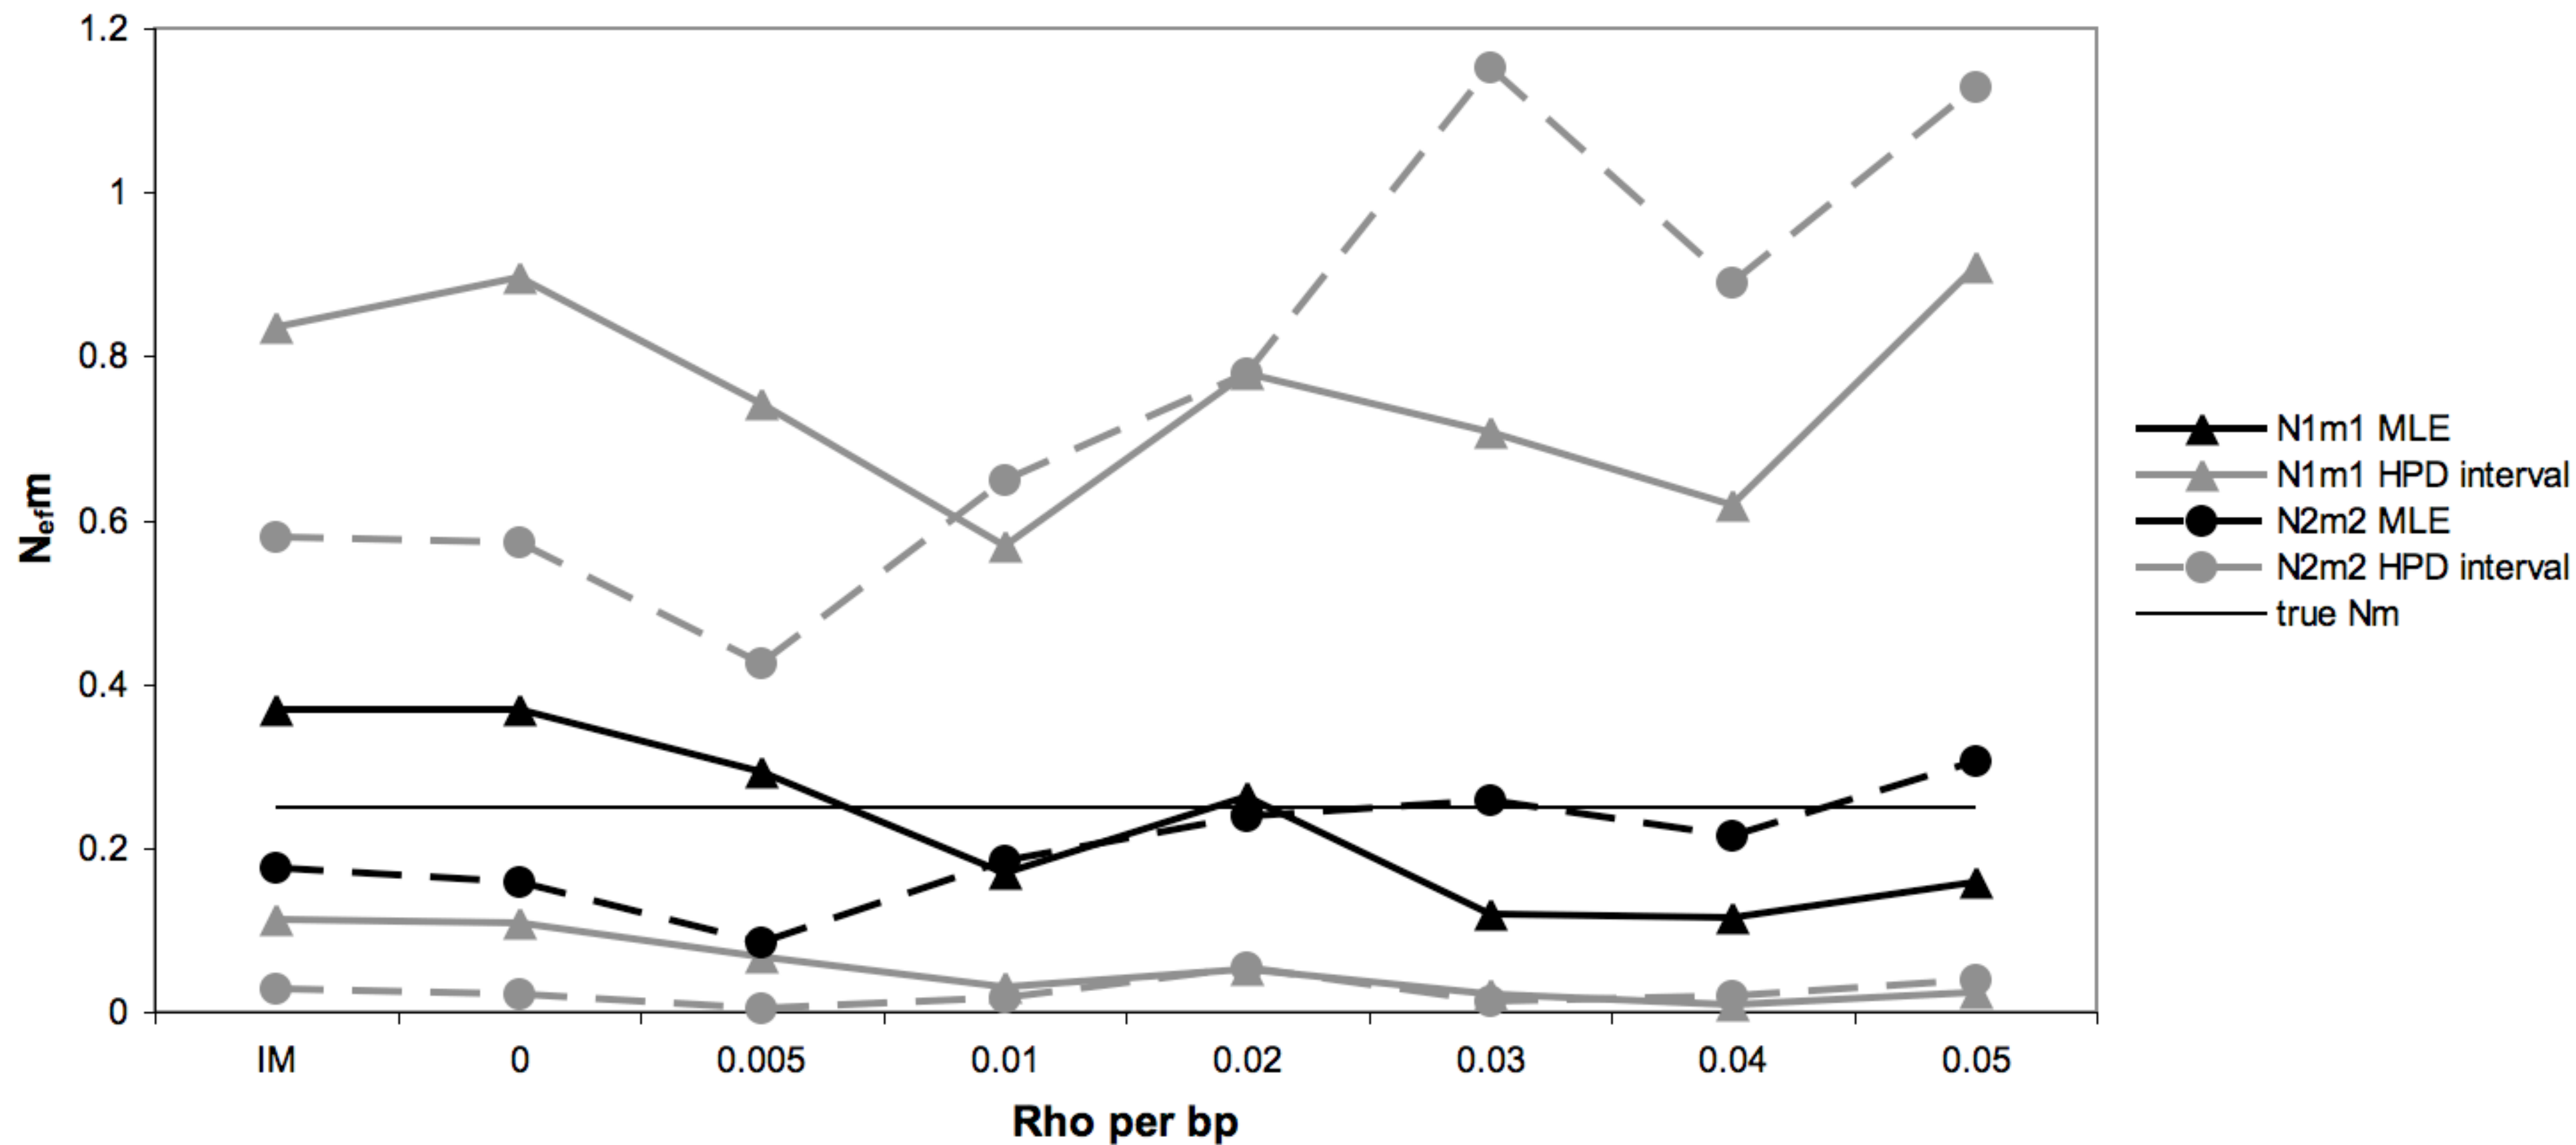

# Percent Coefficient of Variation, HKY Non-Recombining Blocks

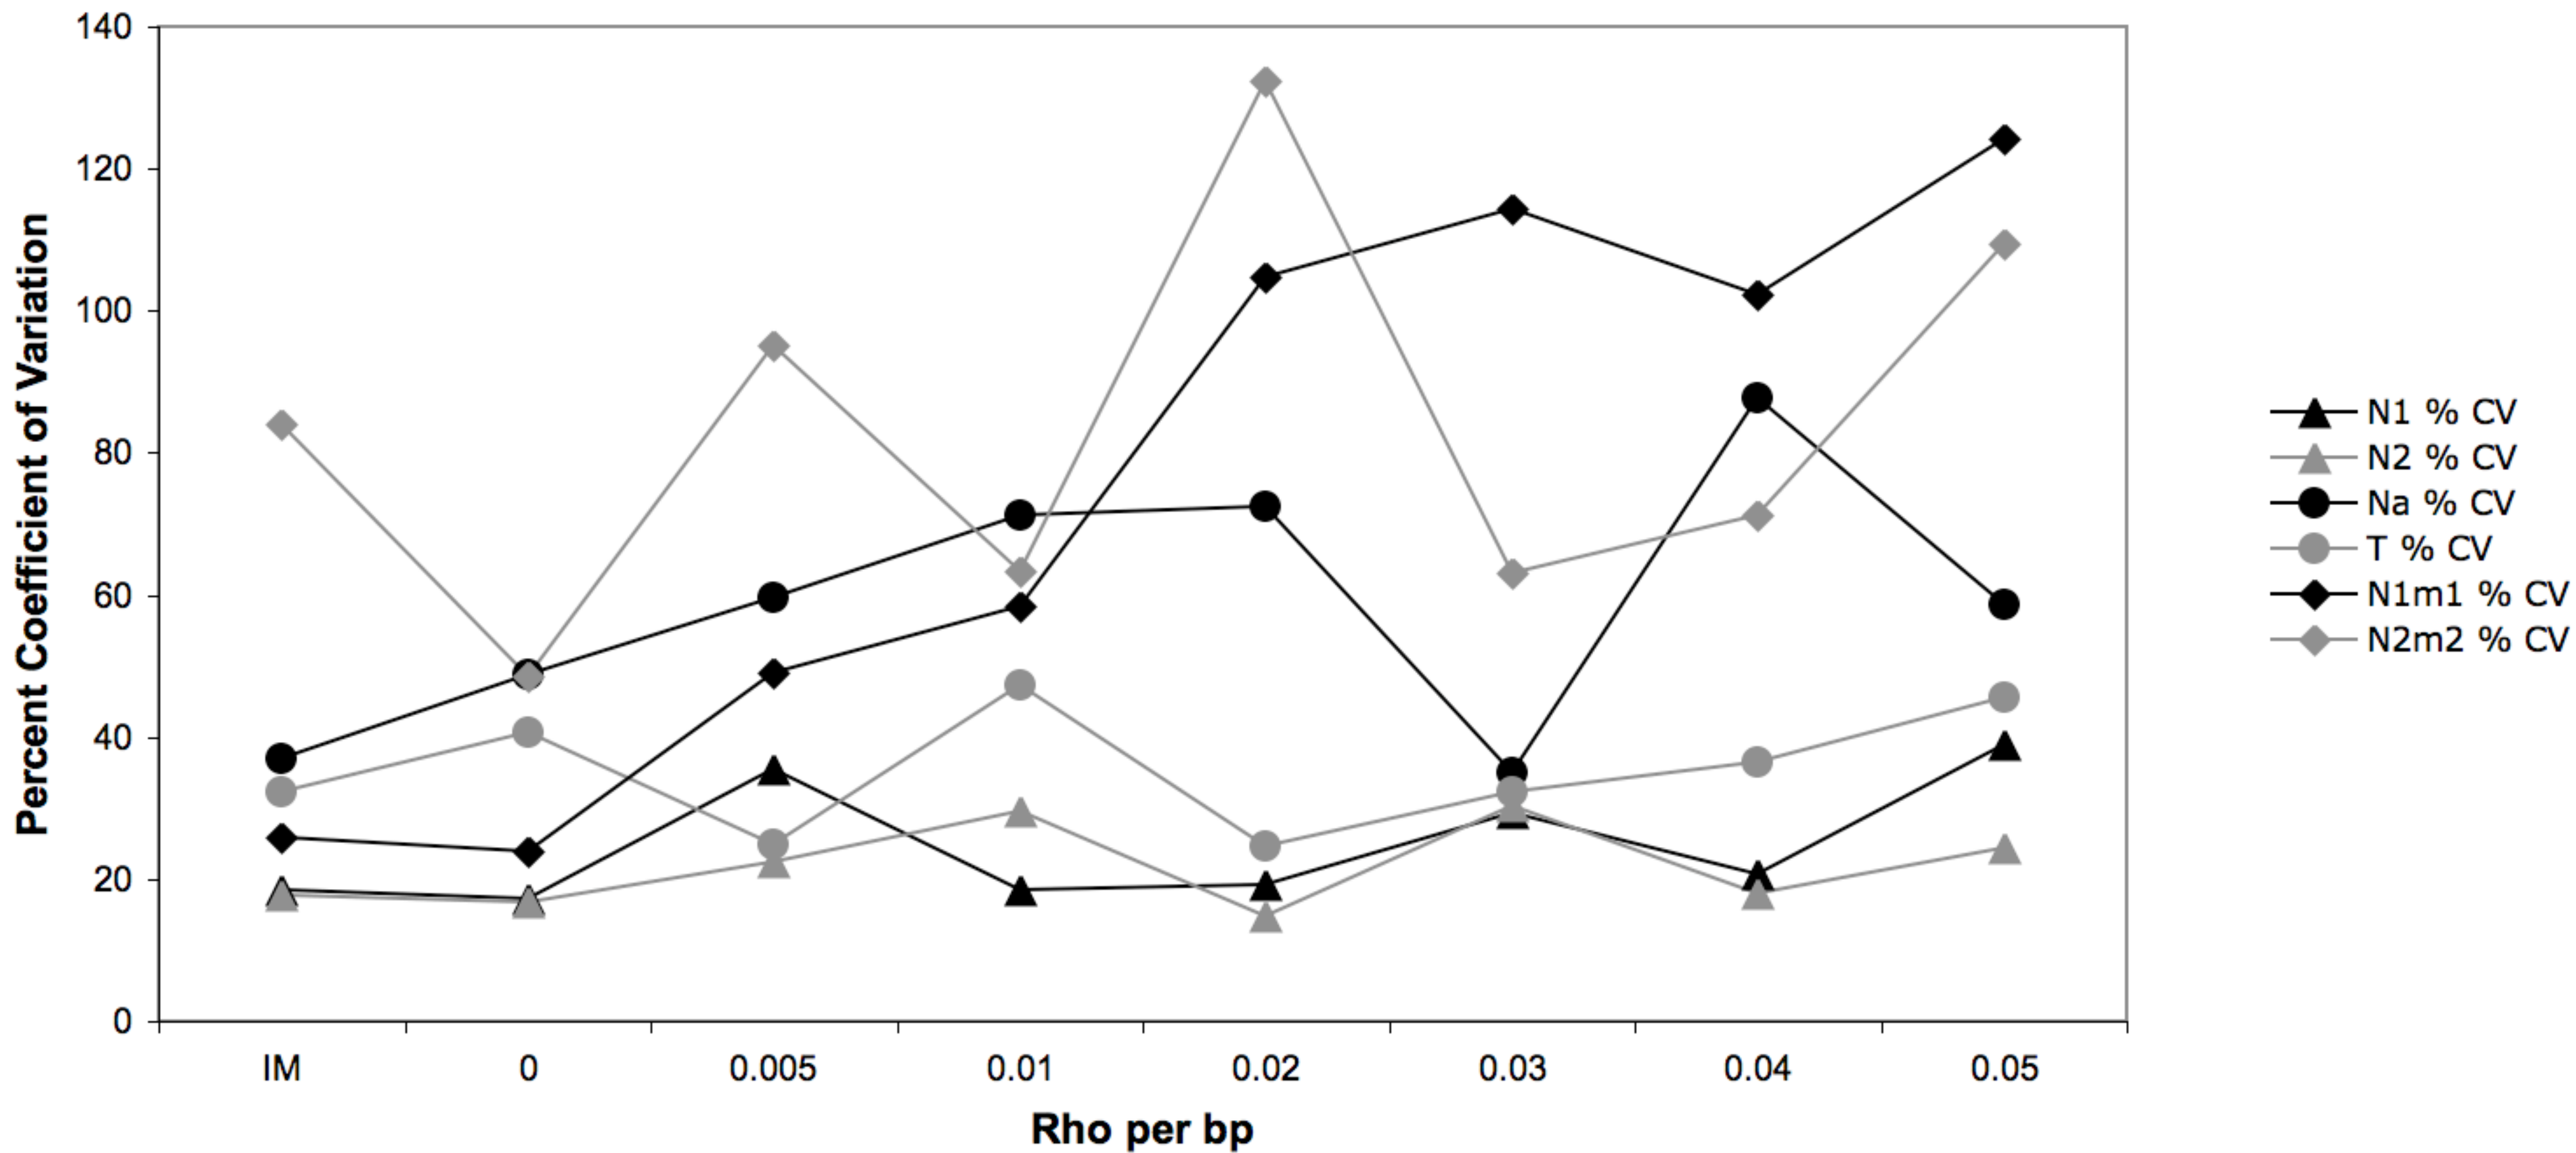



# Current Effective Population Sizes with 3rd Species Gene Flow

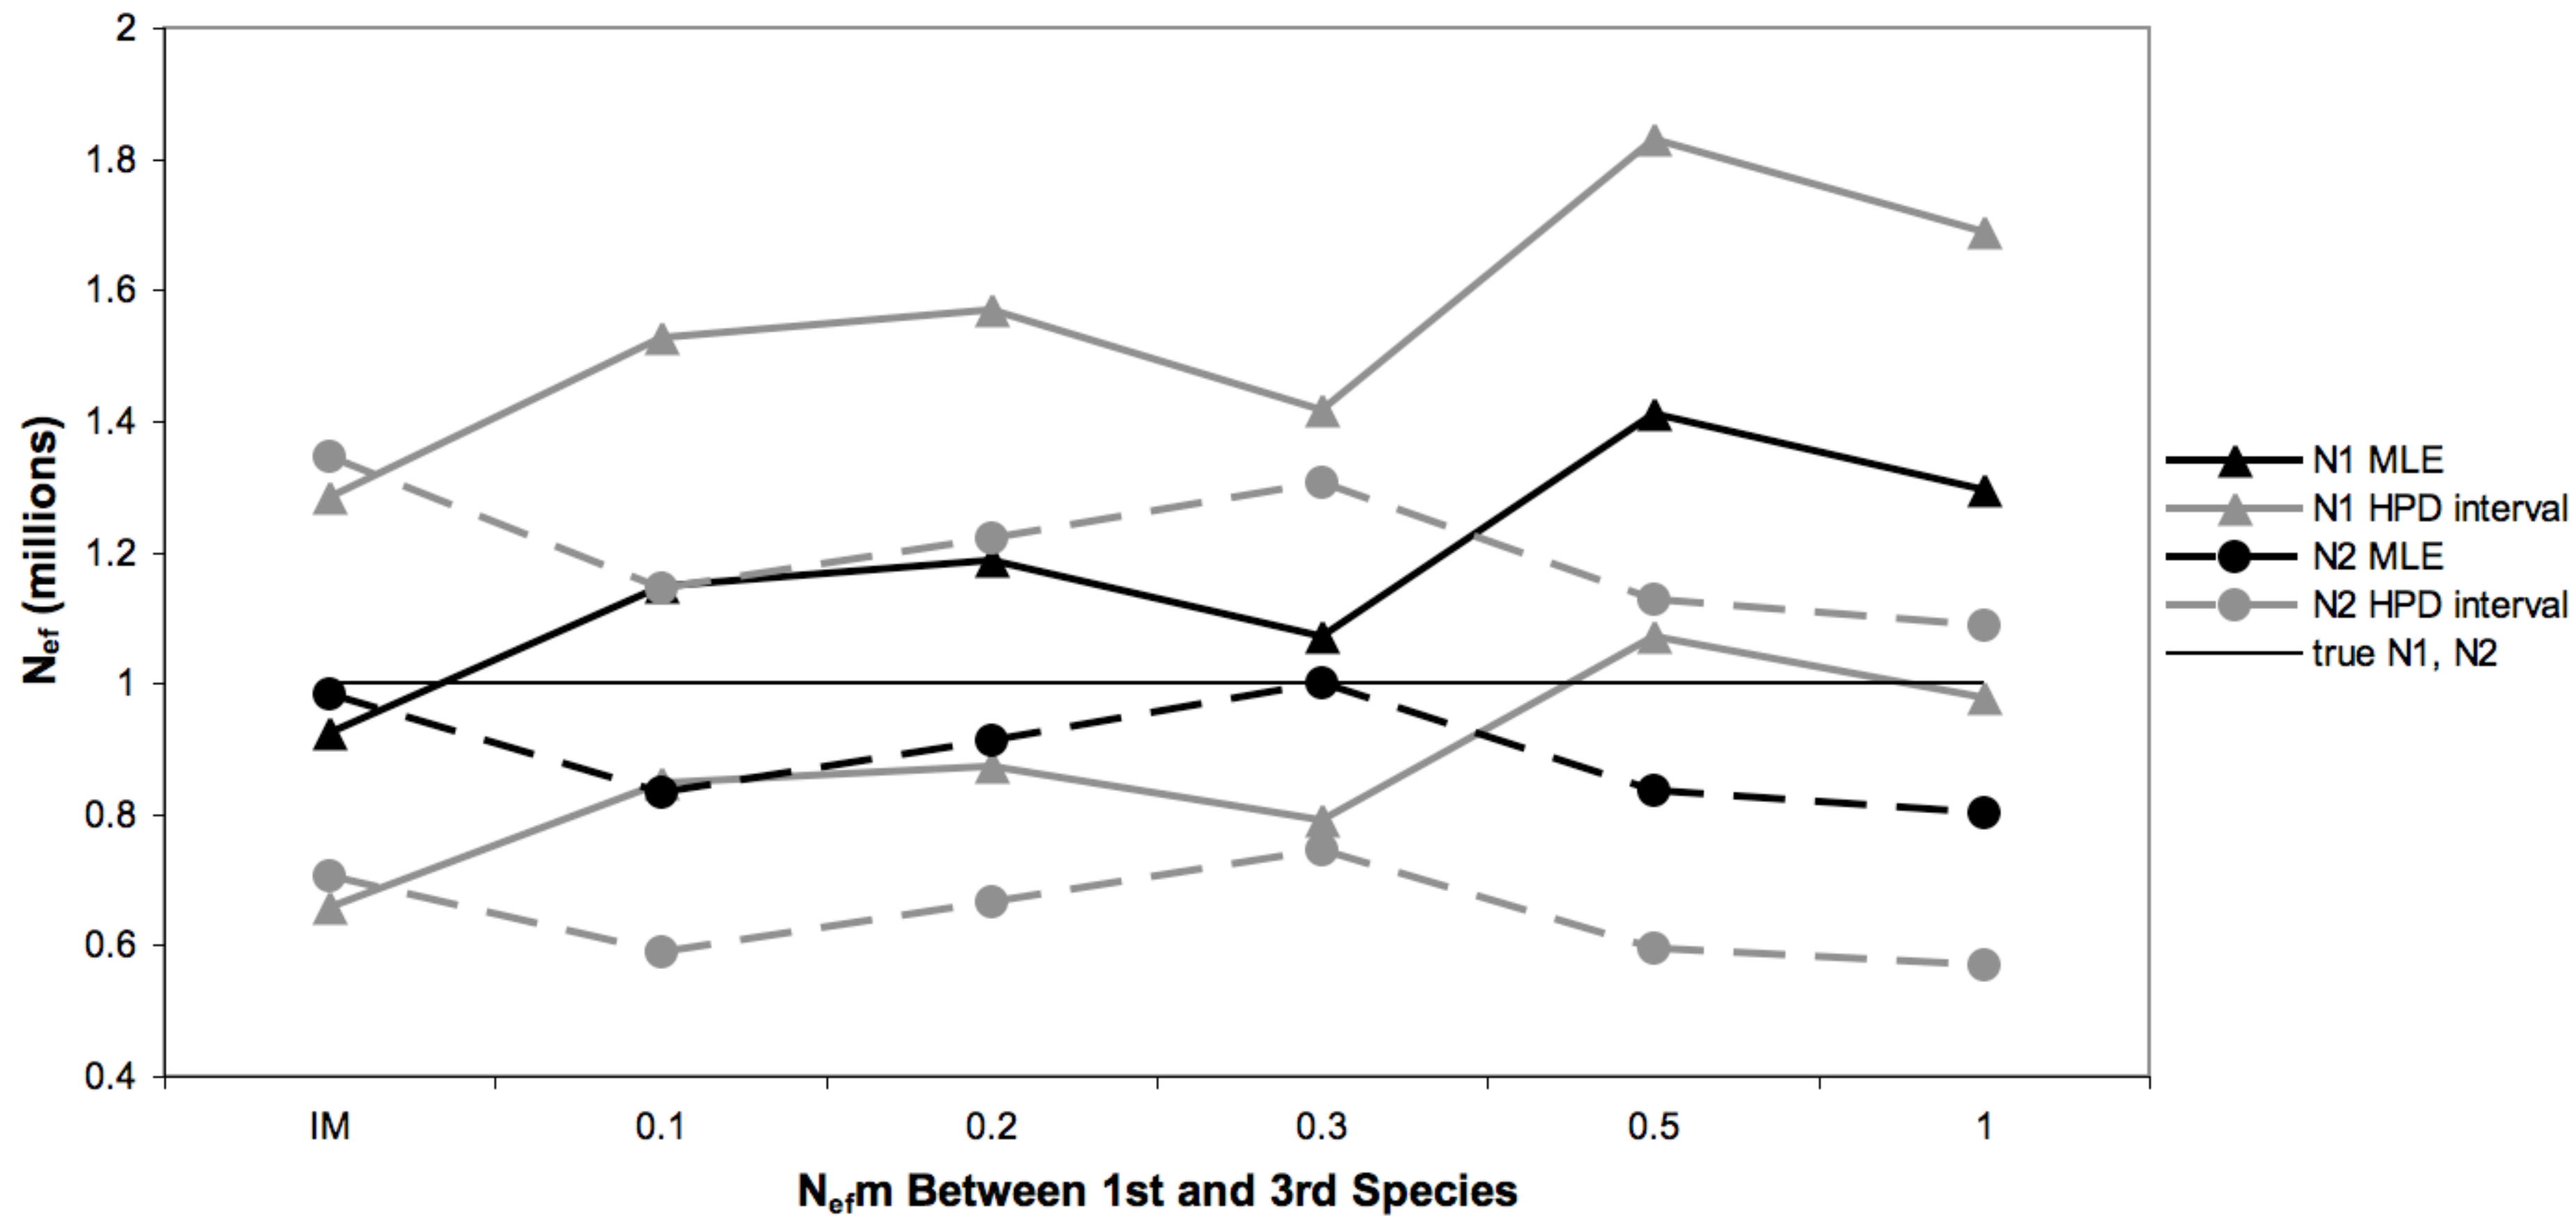

# Ancestral Effective Population Size with 3rd Species Gene Flow

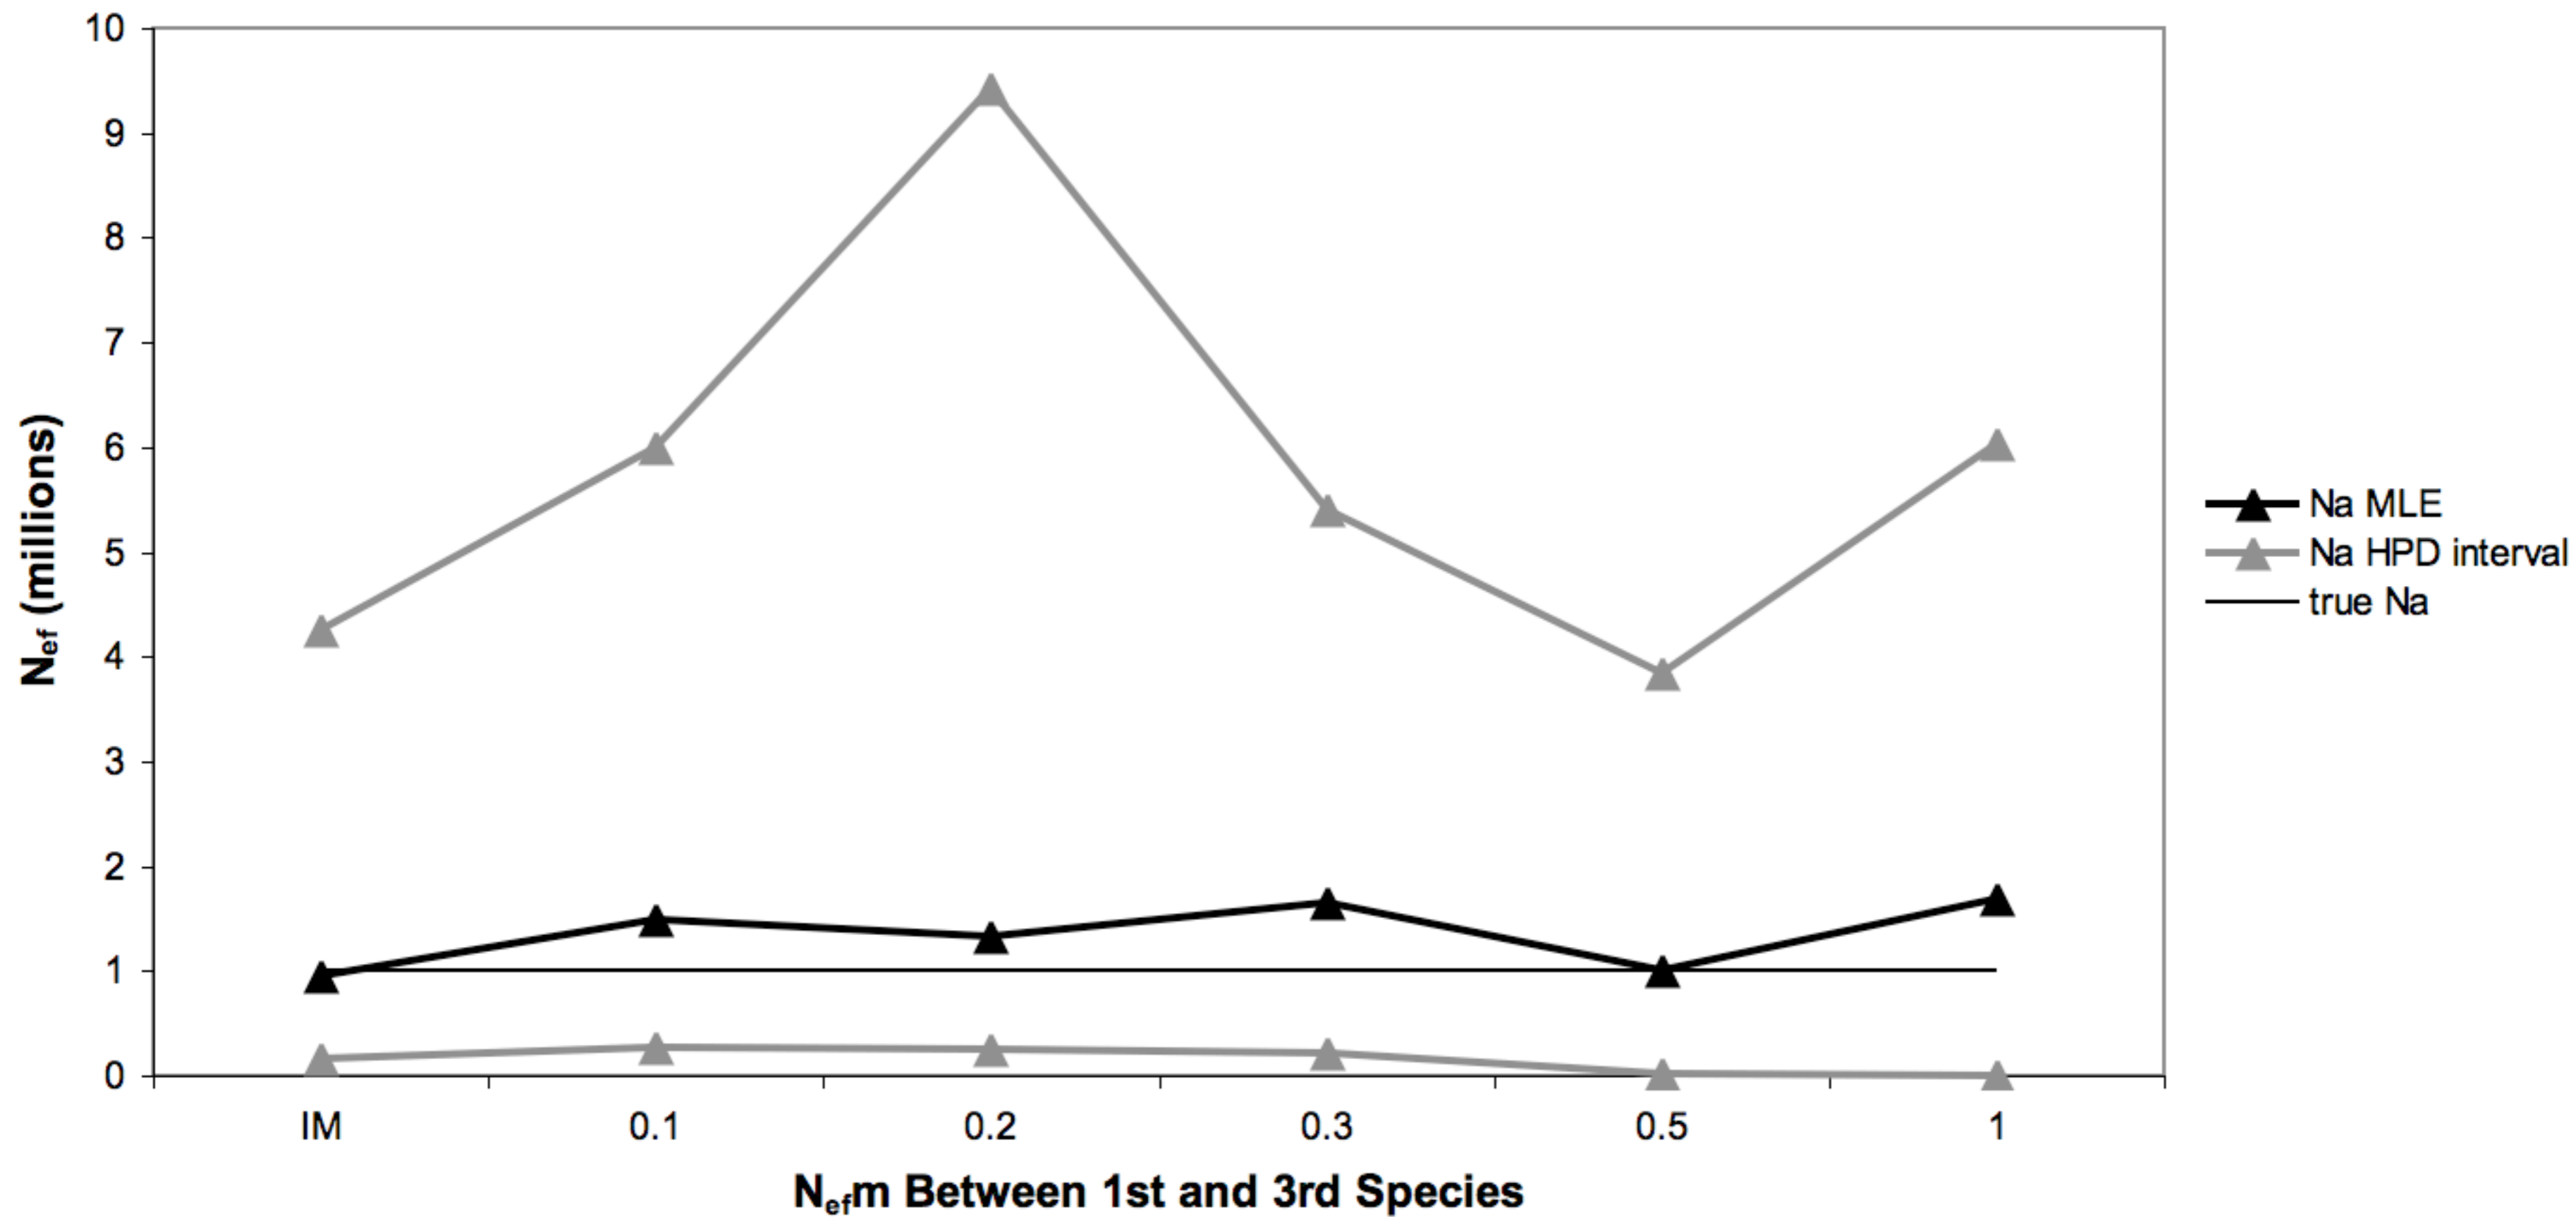

## Divergence Time with 3rd Species Gene Flow

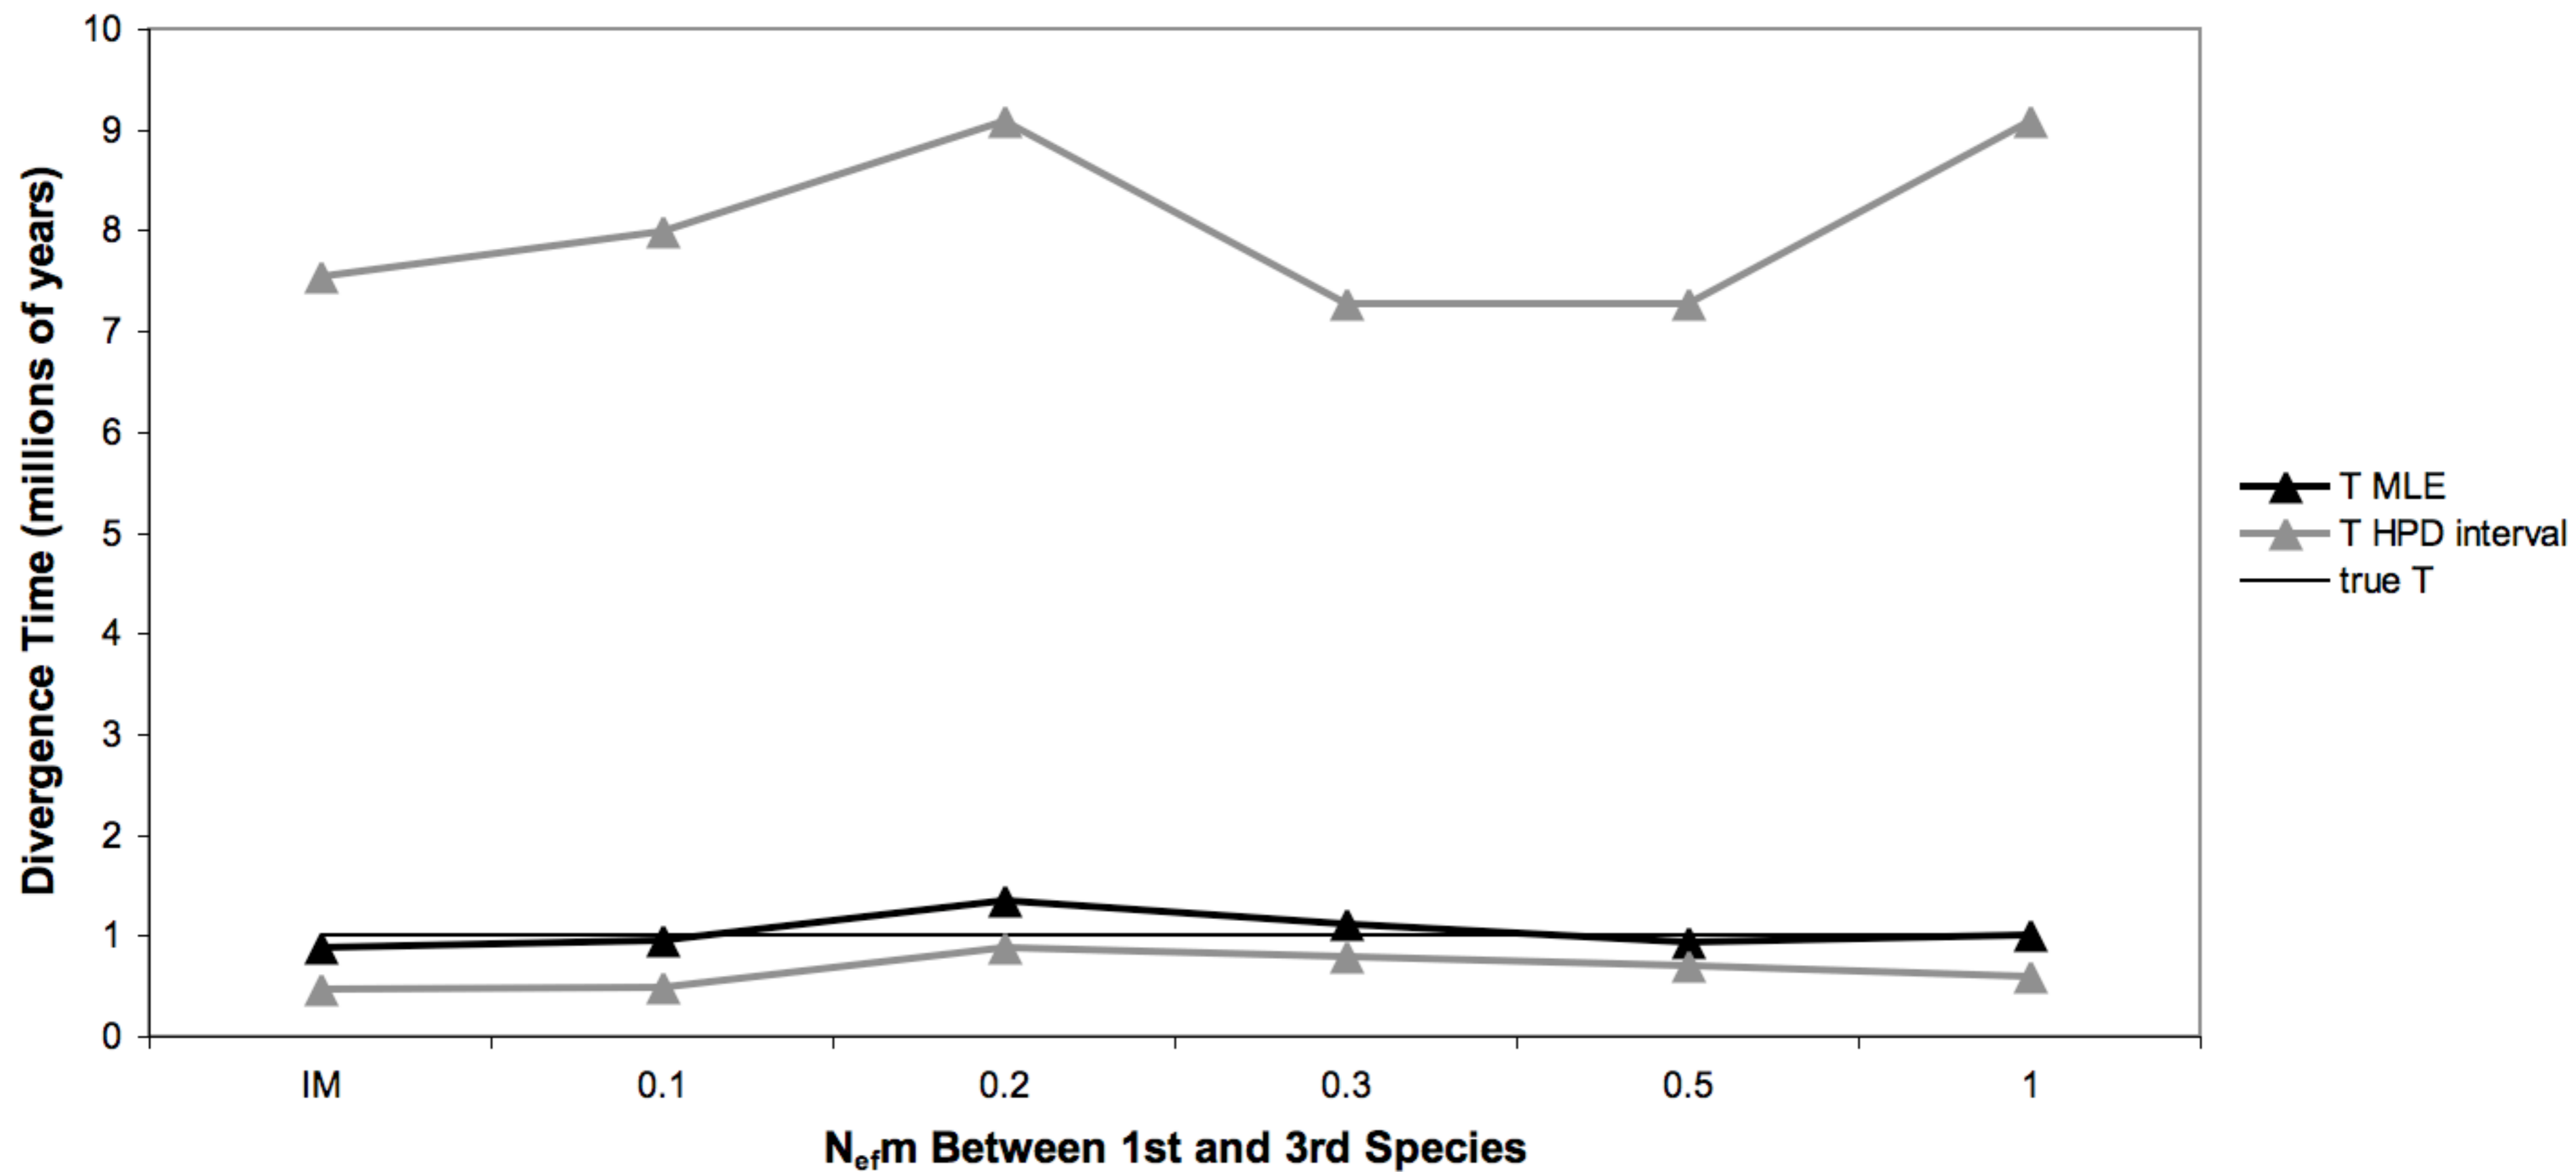

# Gene Flow Rates with 3rd Species Gene Flow

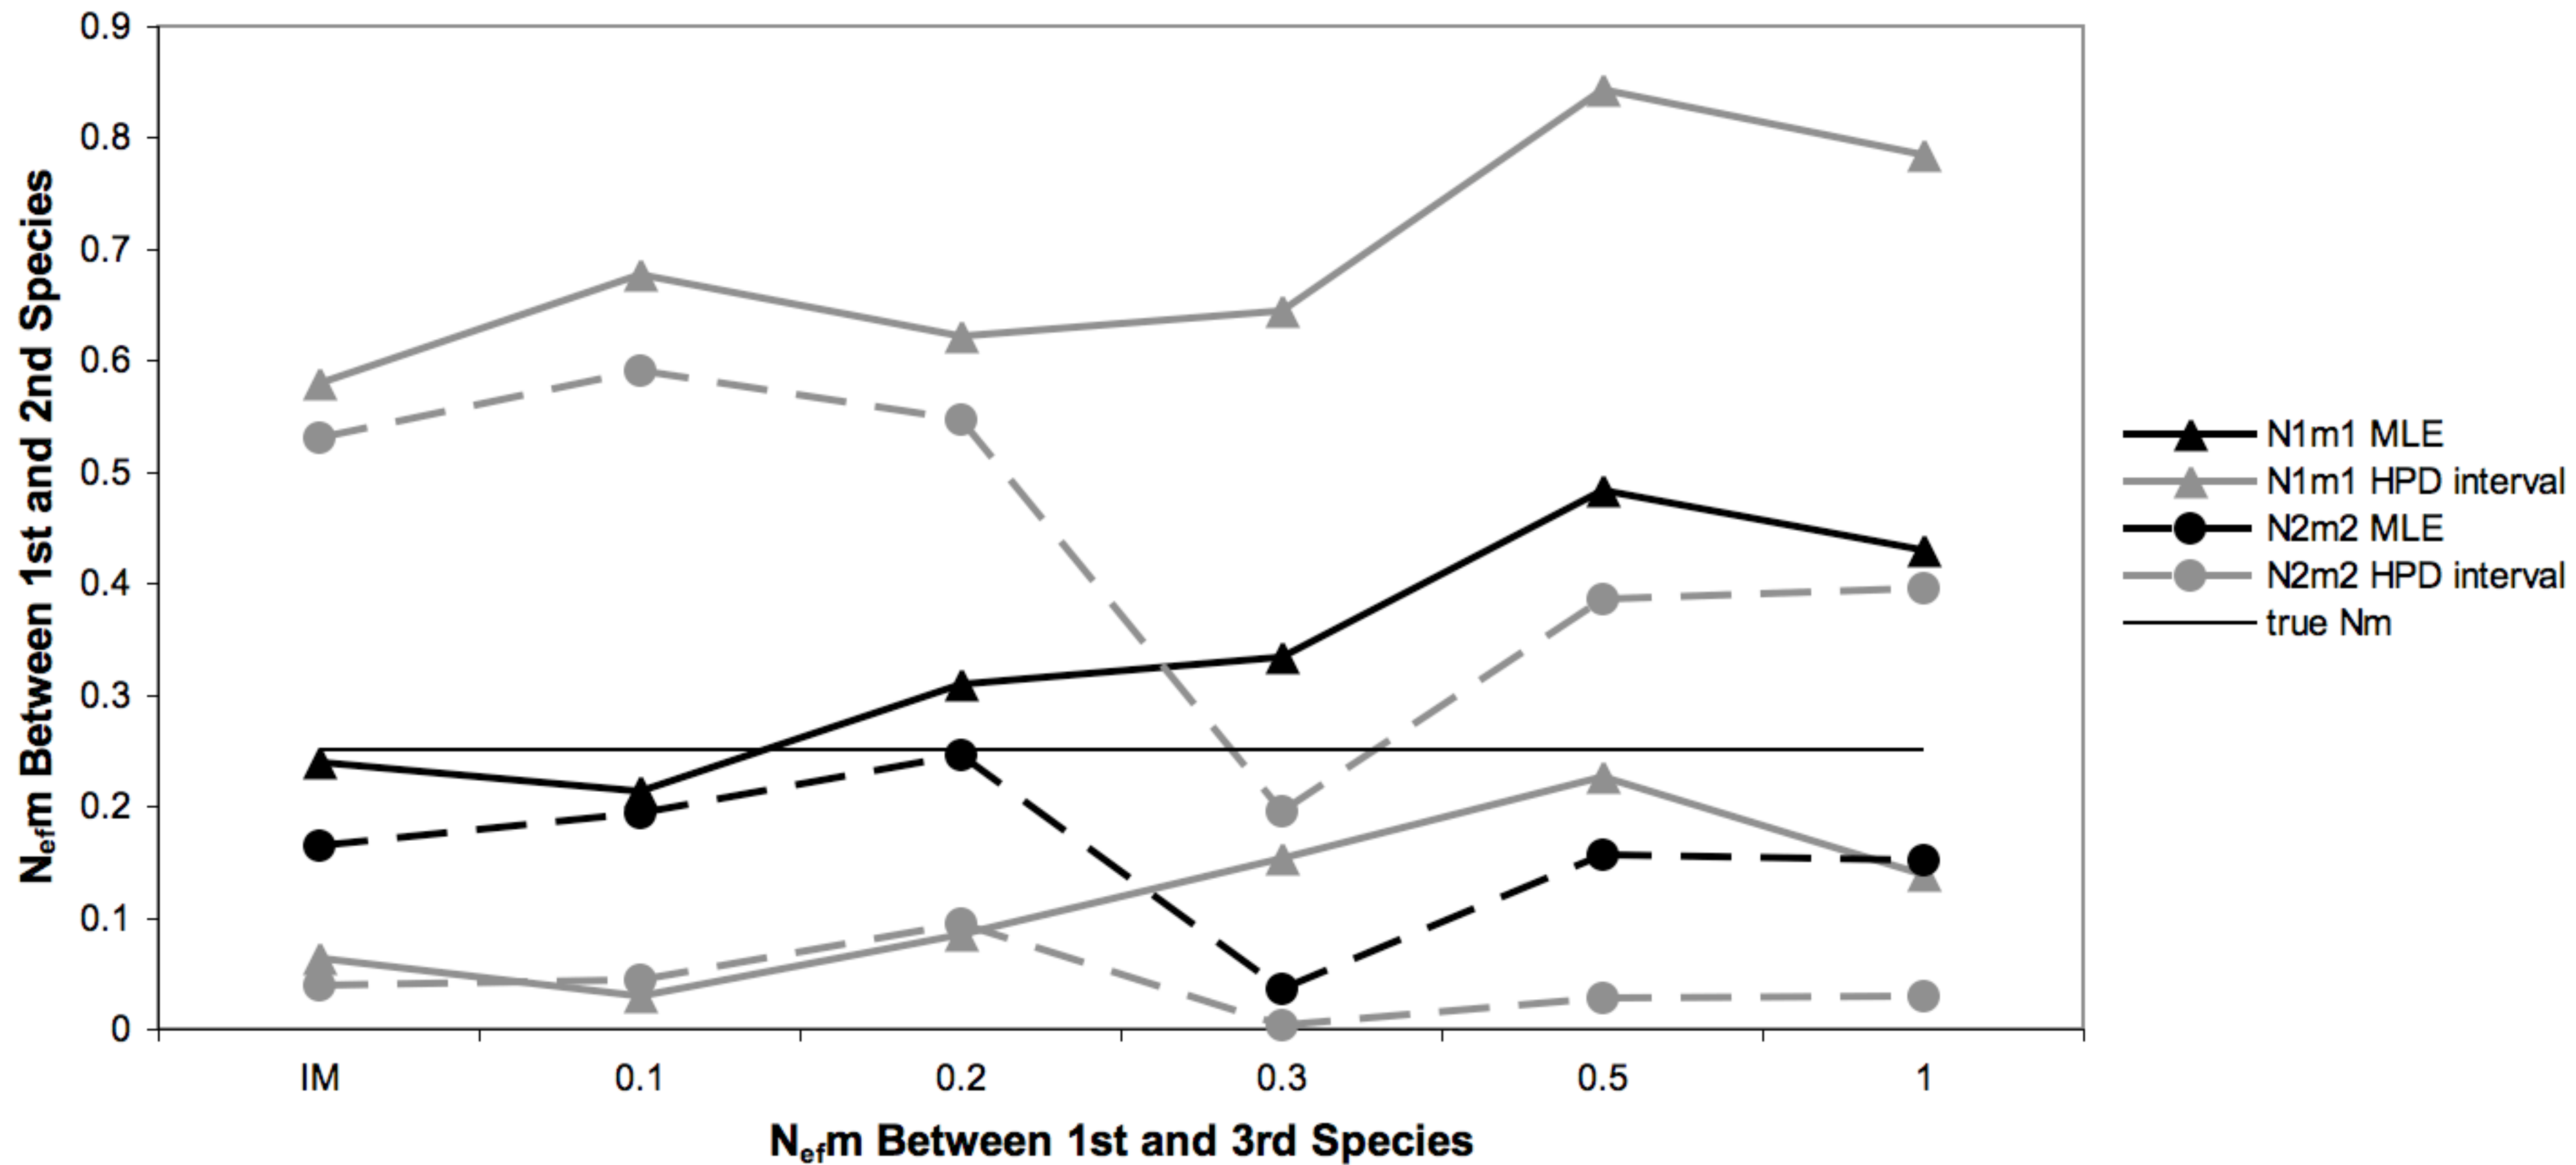

# Percent Coefficient of Variation, 3rd Species Gene Flow

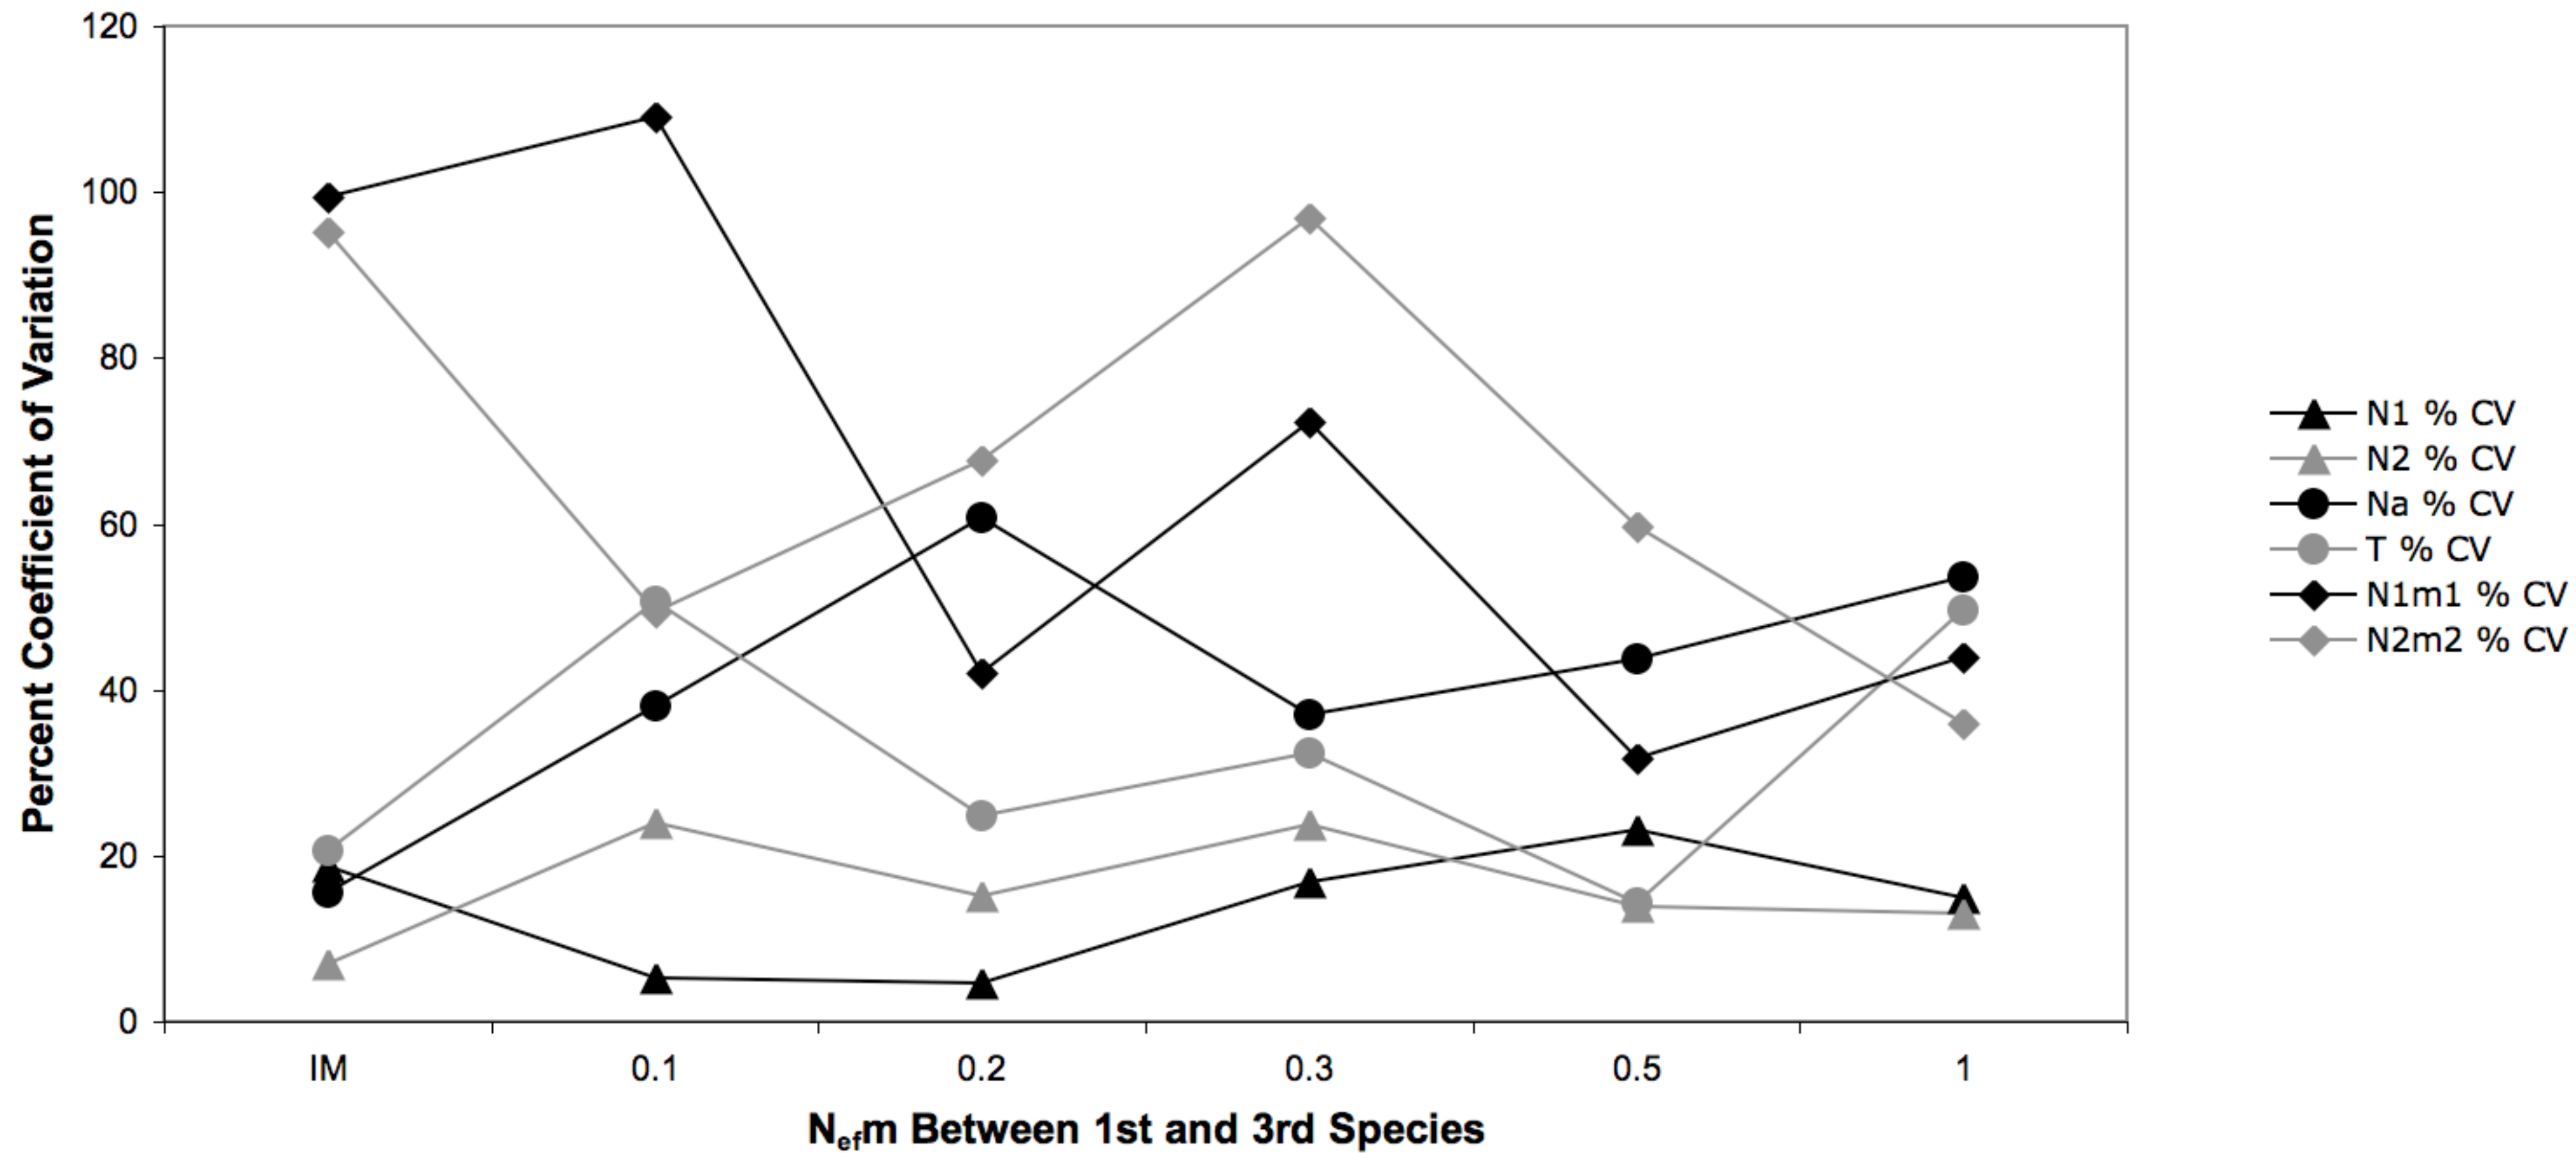

# Current Effective Population Sizes with Population Structure

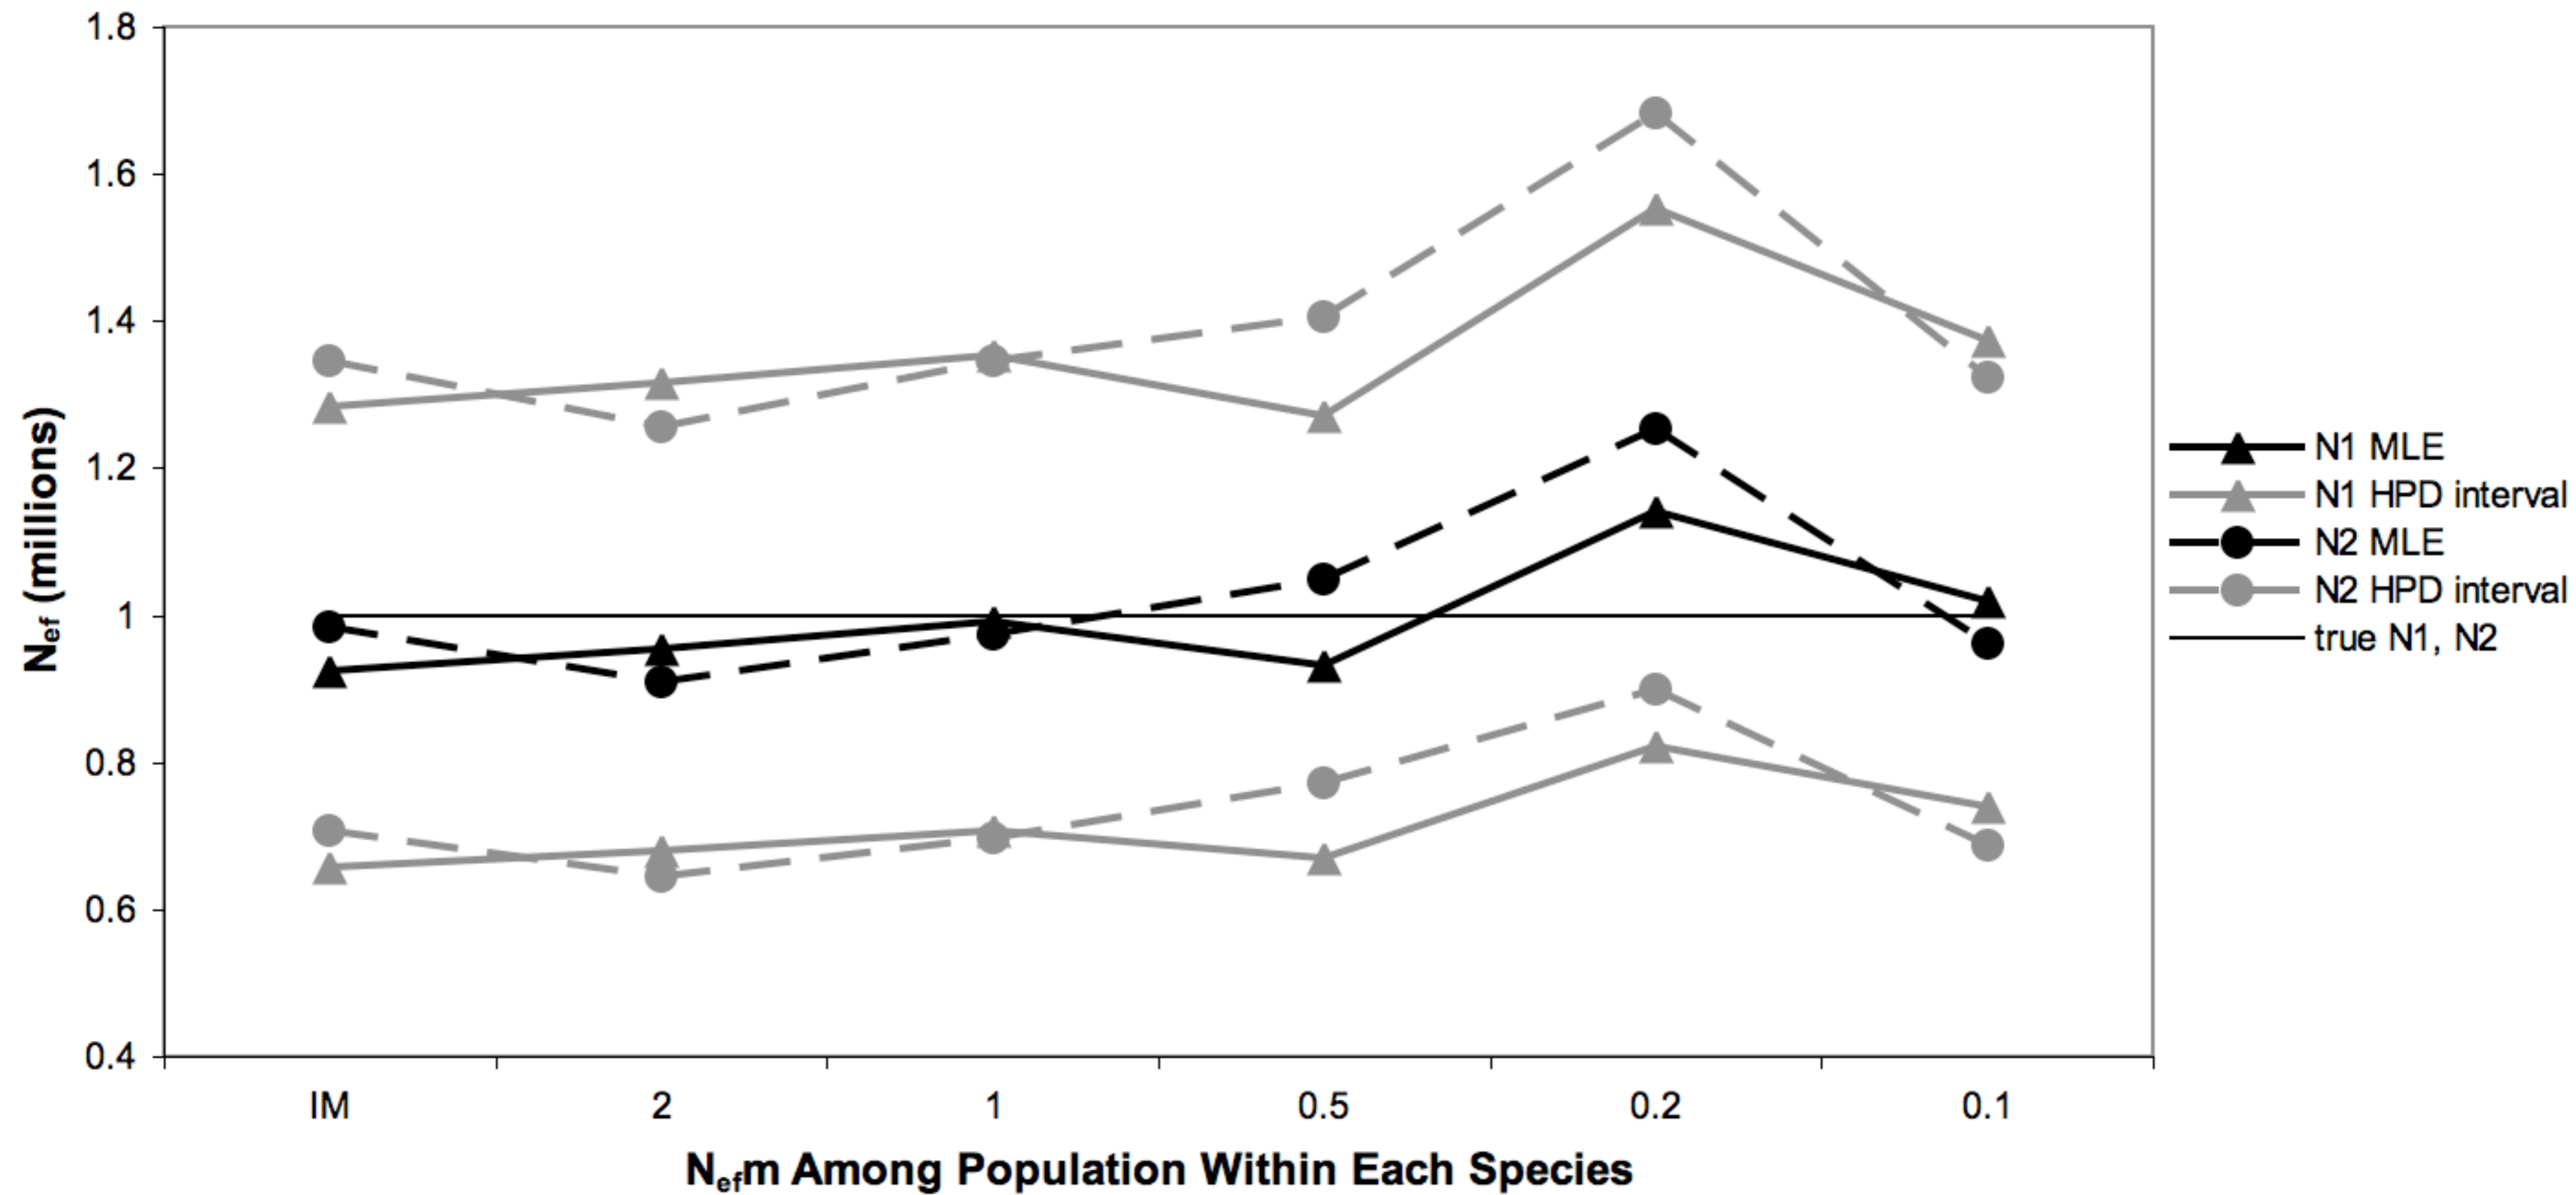

# Ancestral Effective Population Size with Population Structure

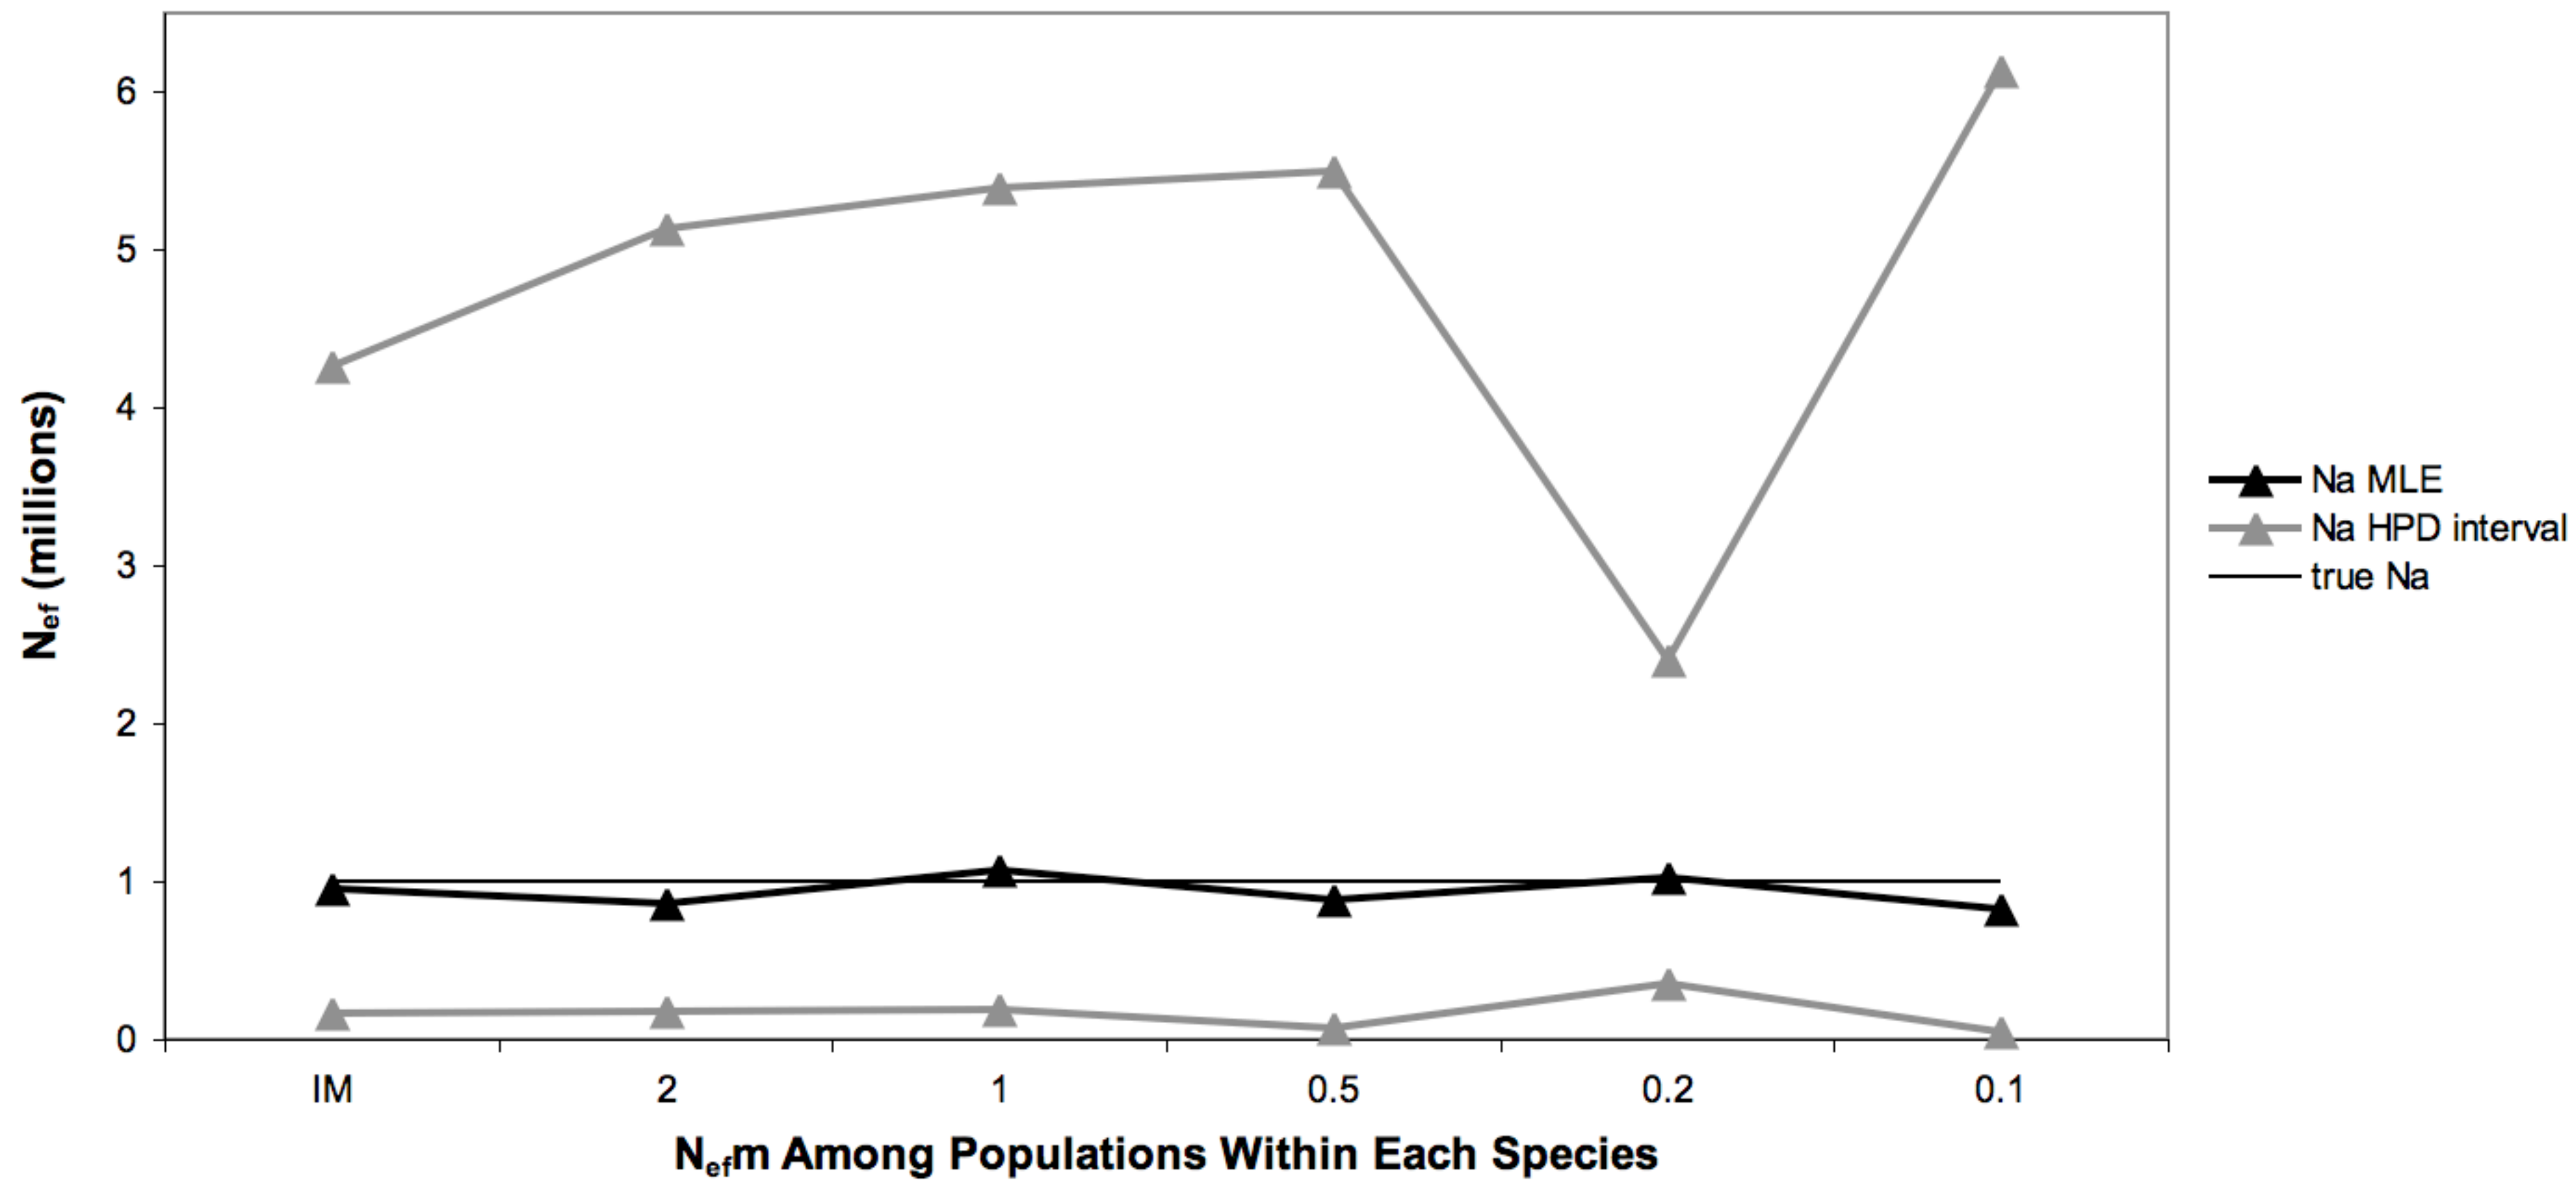

# Divergence Time with Population Structure

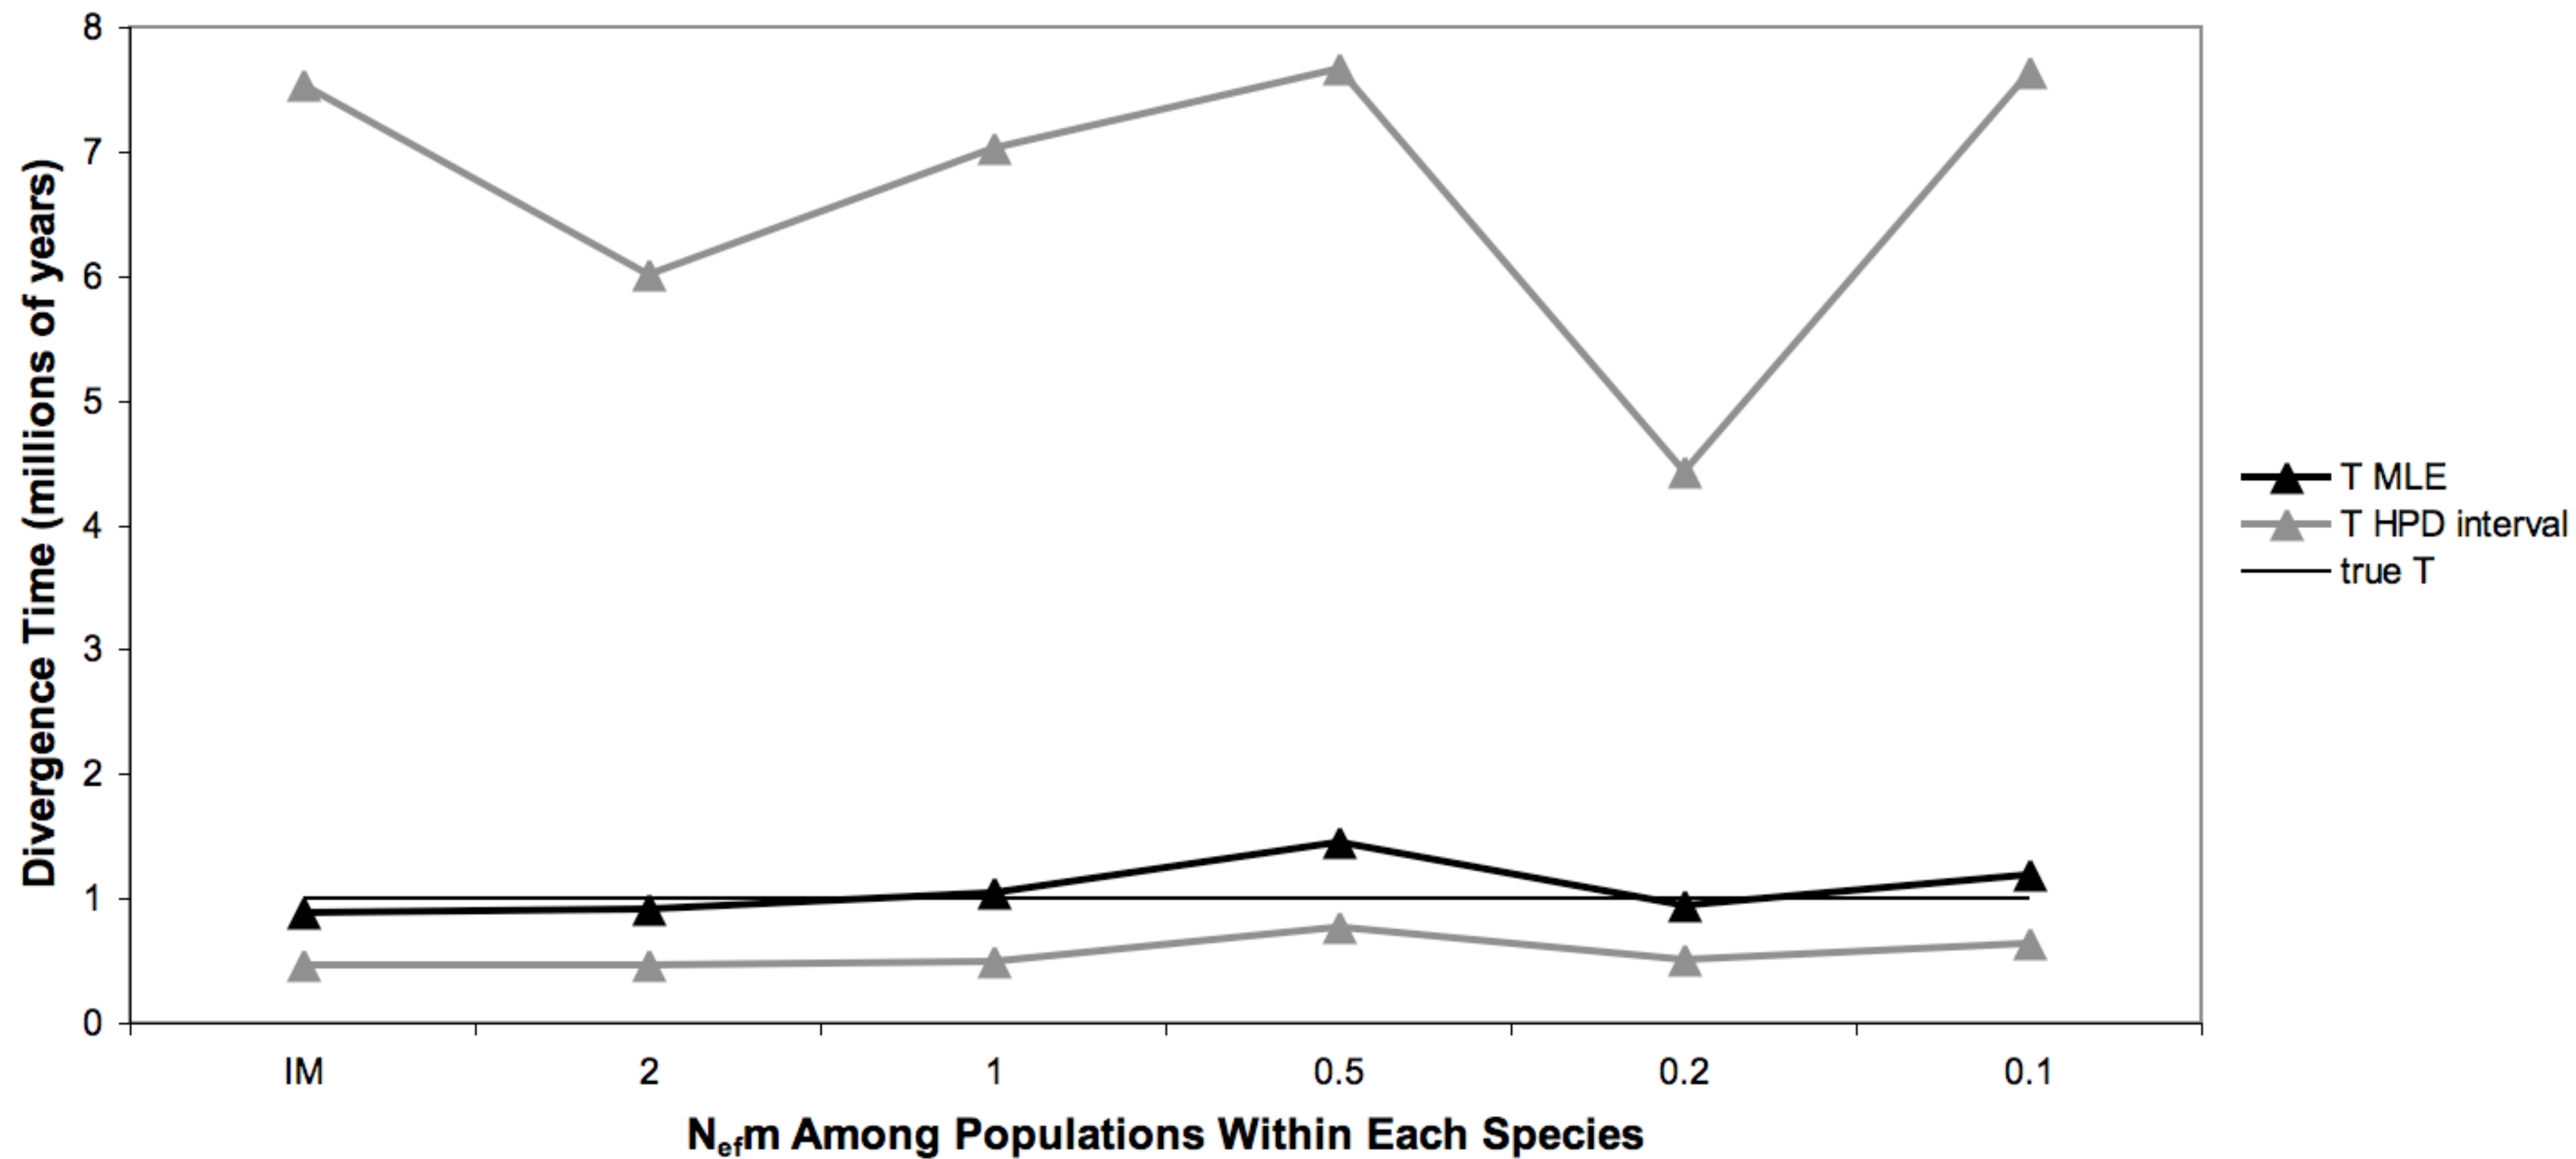



# Gene Flow Rates with Population Structure

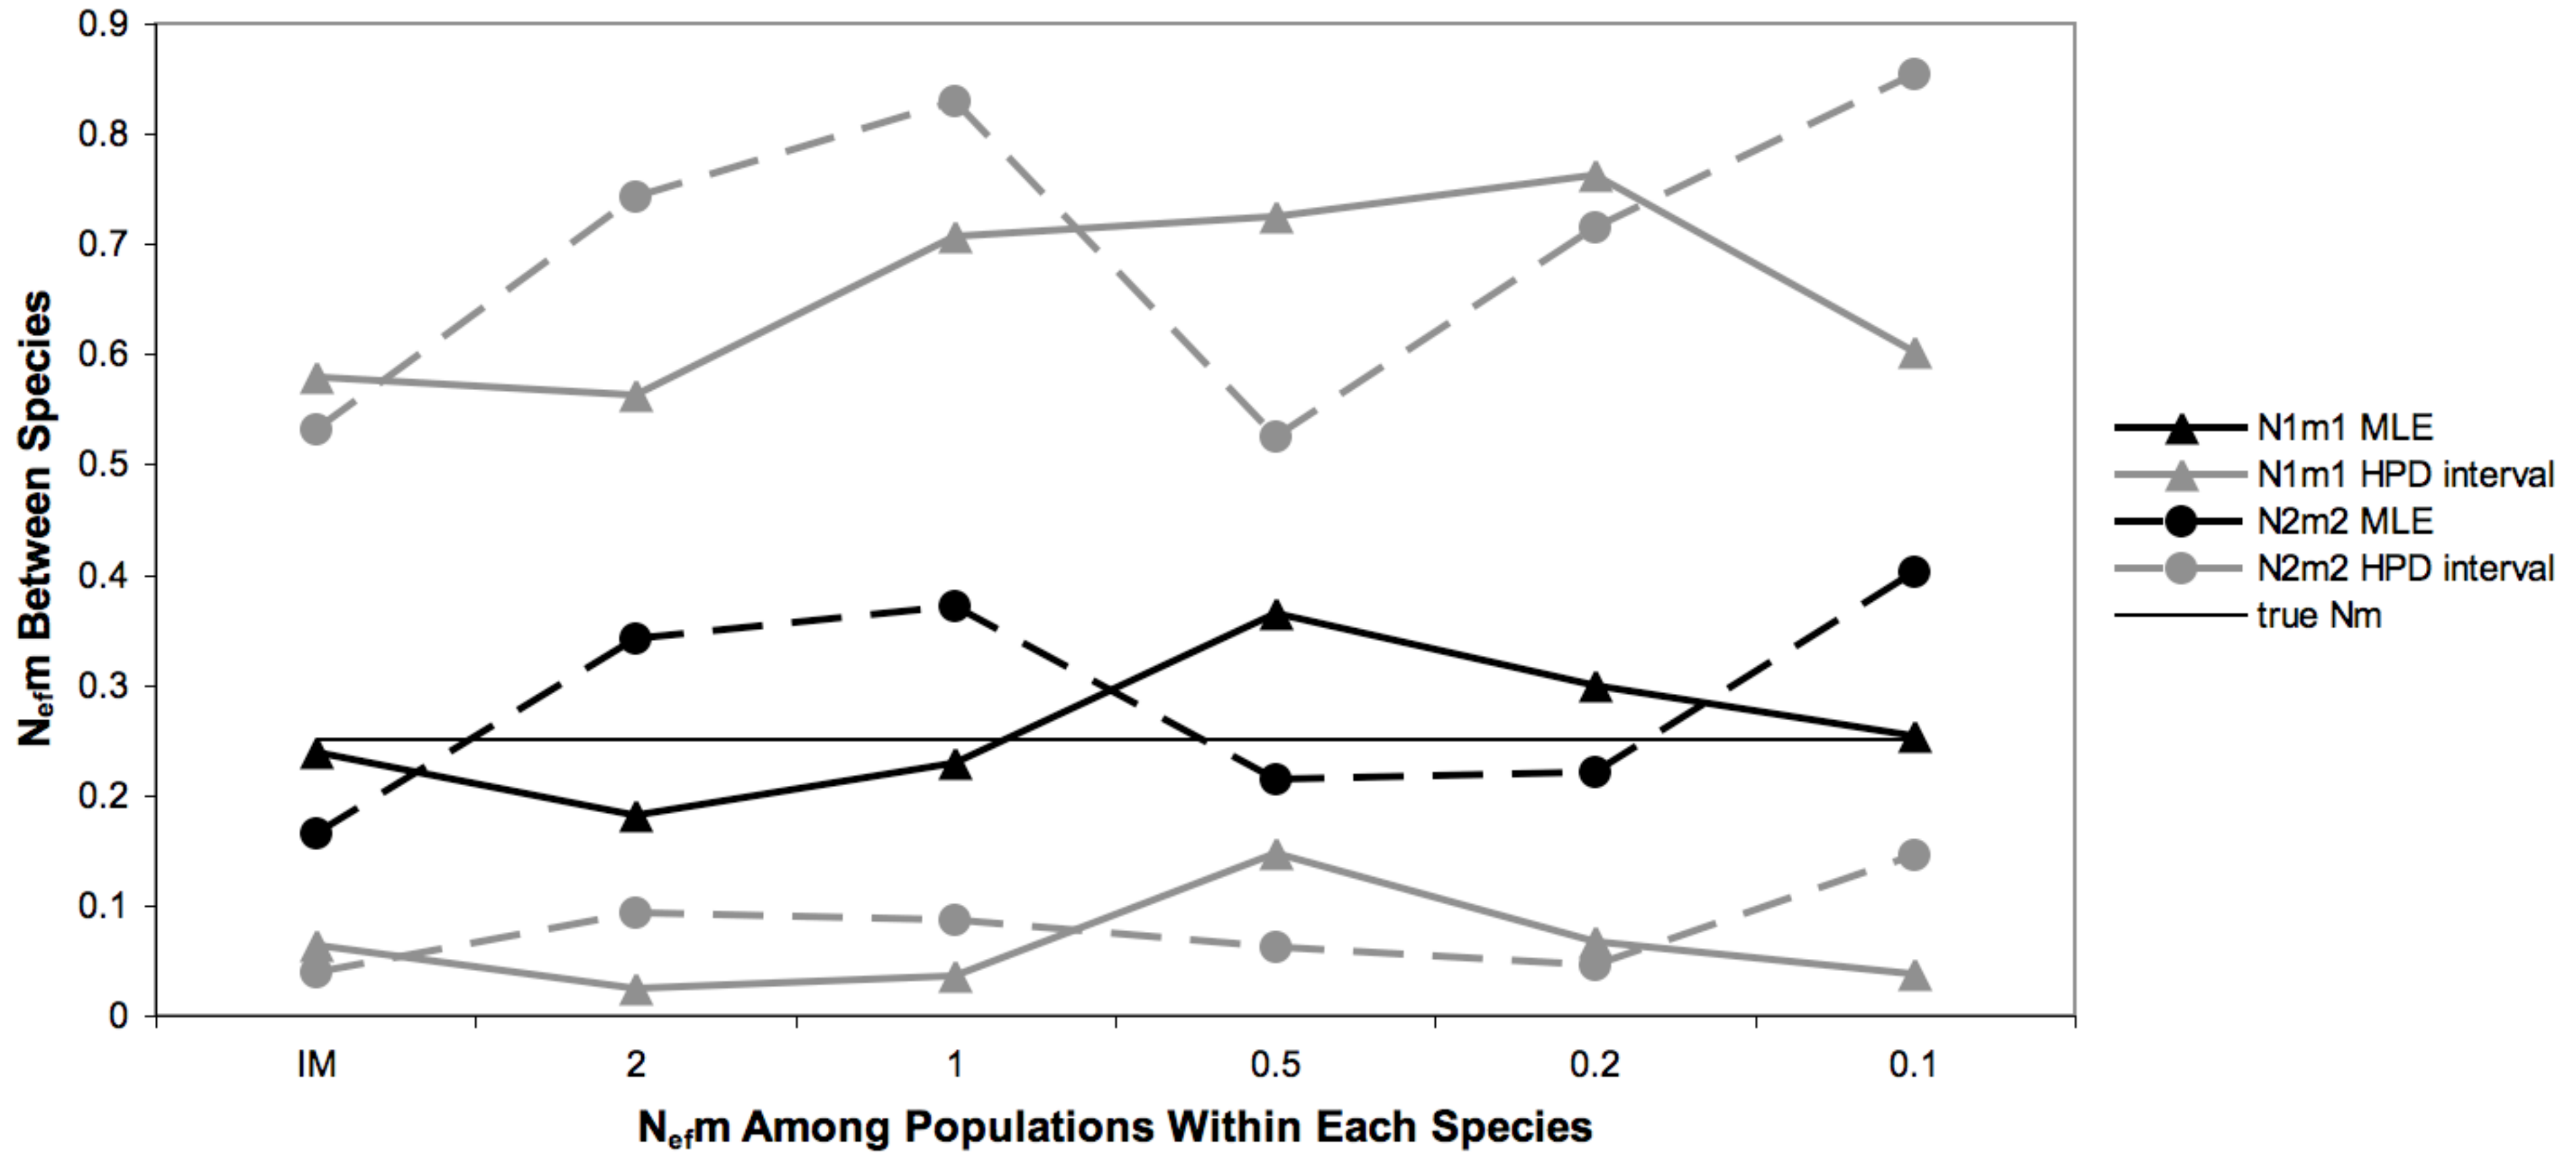

# Percent Coefficient of Variation, Population Structure

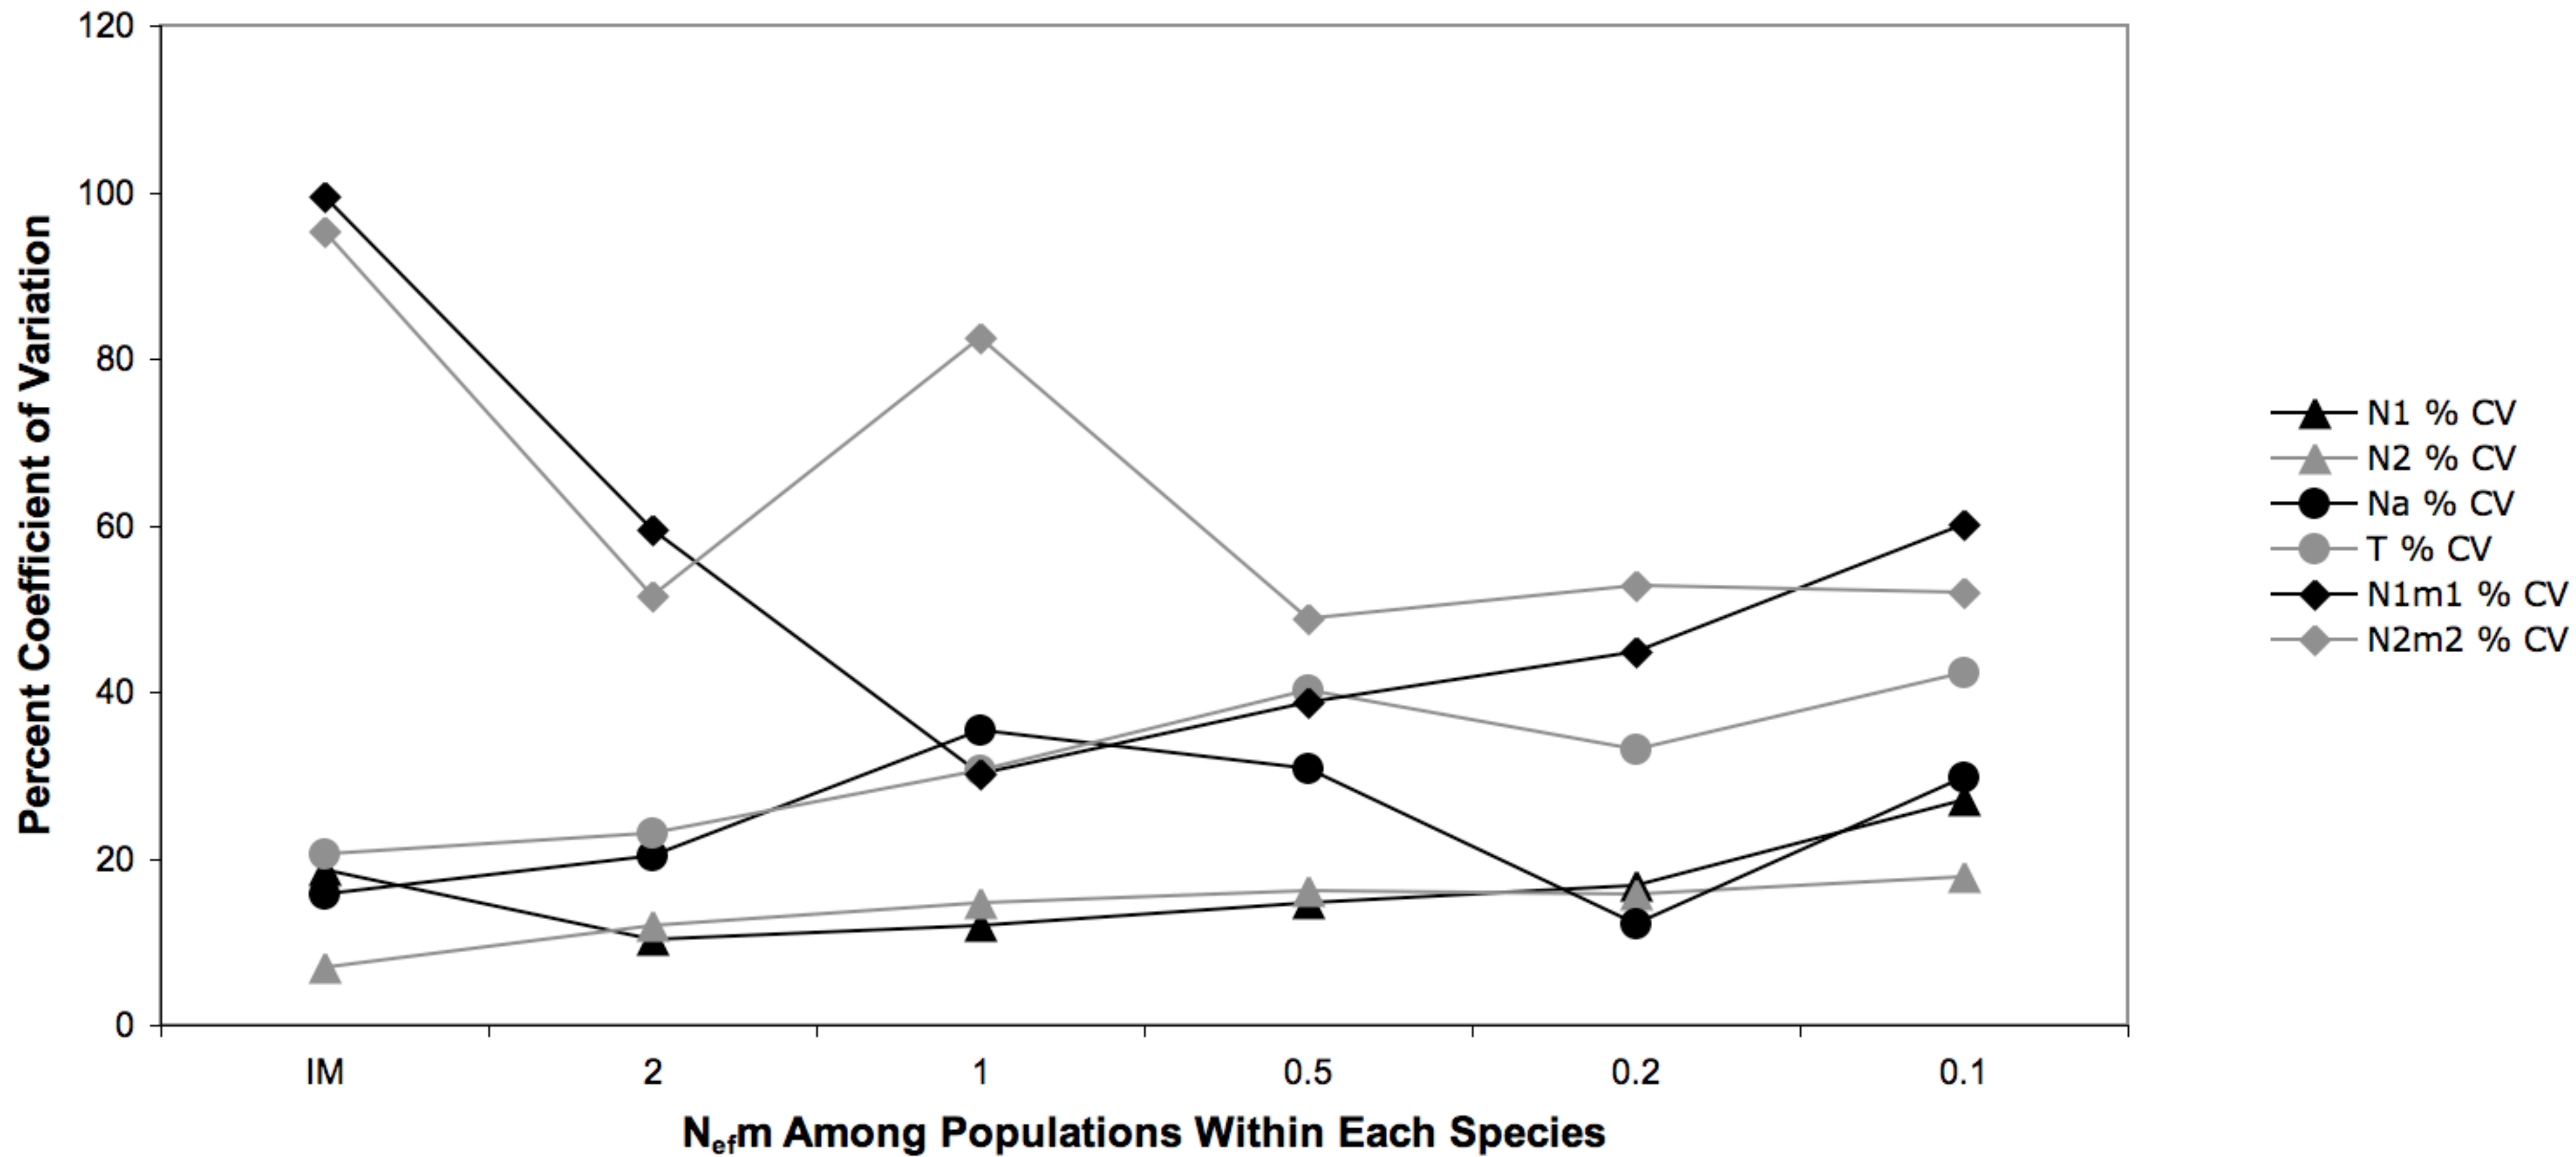

# Current Effective Population Sizes with Linkage

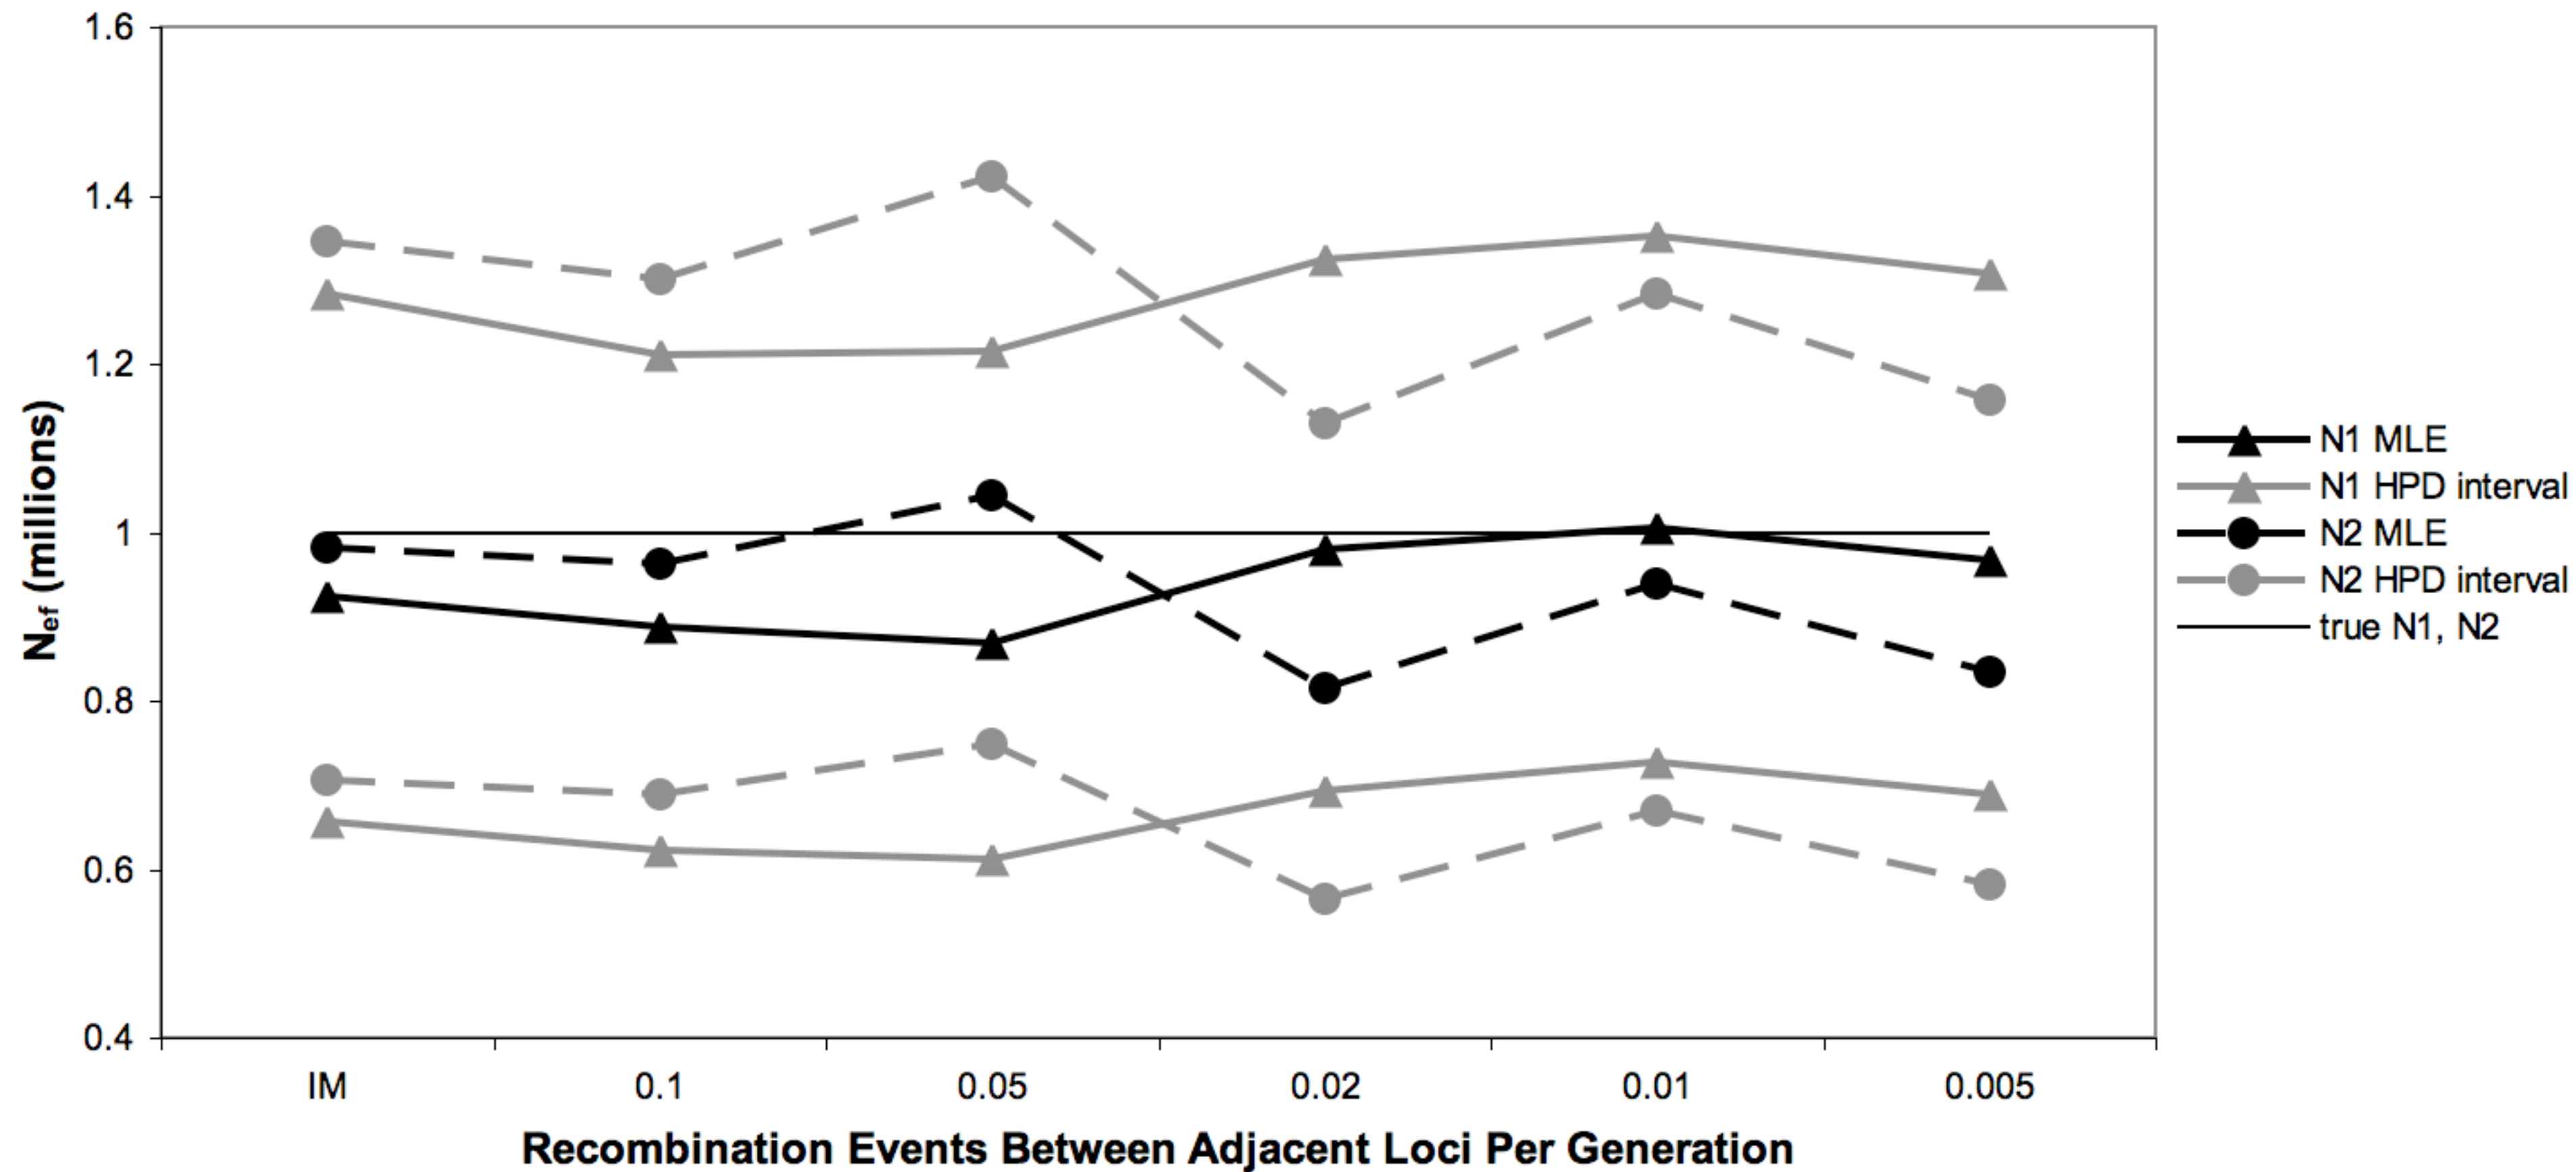

# Ancestral Effective Population Size with Linkage

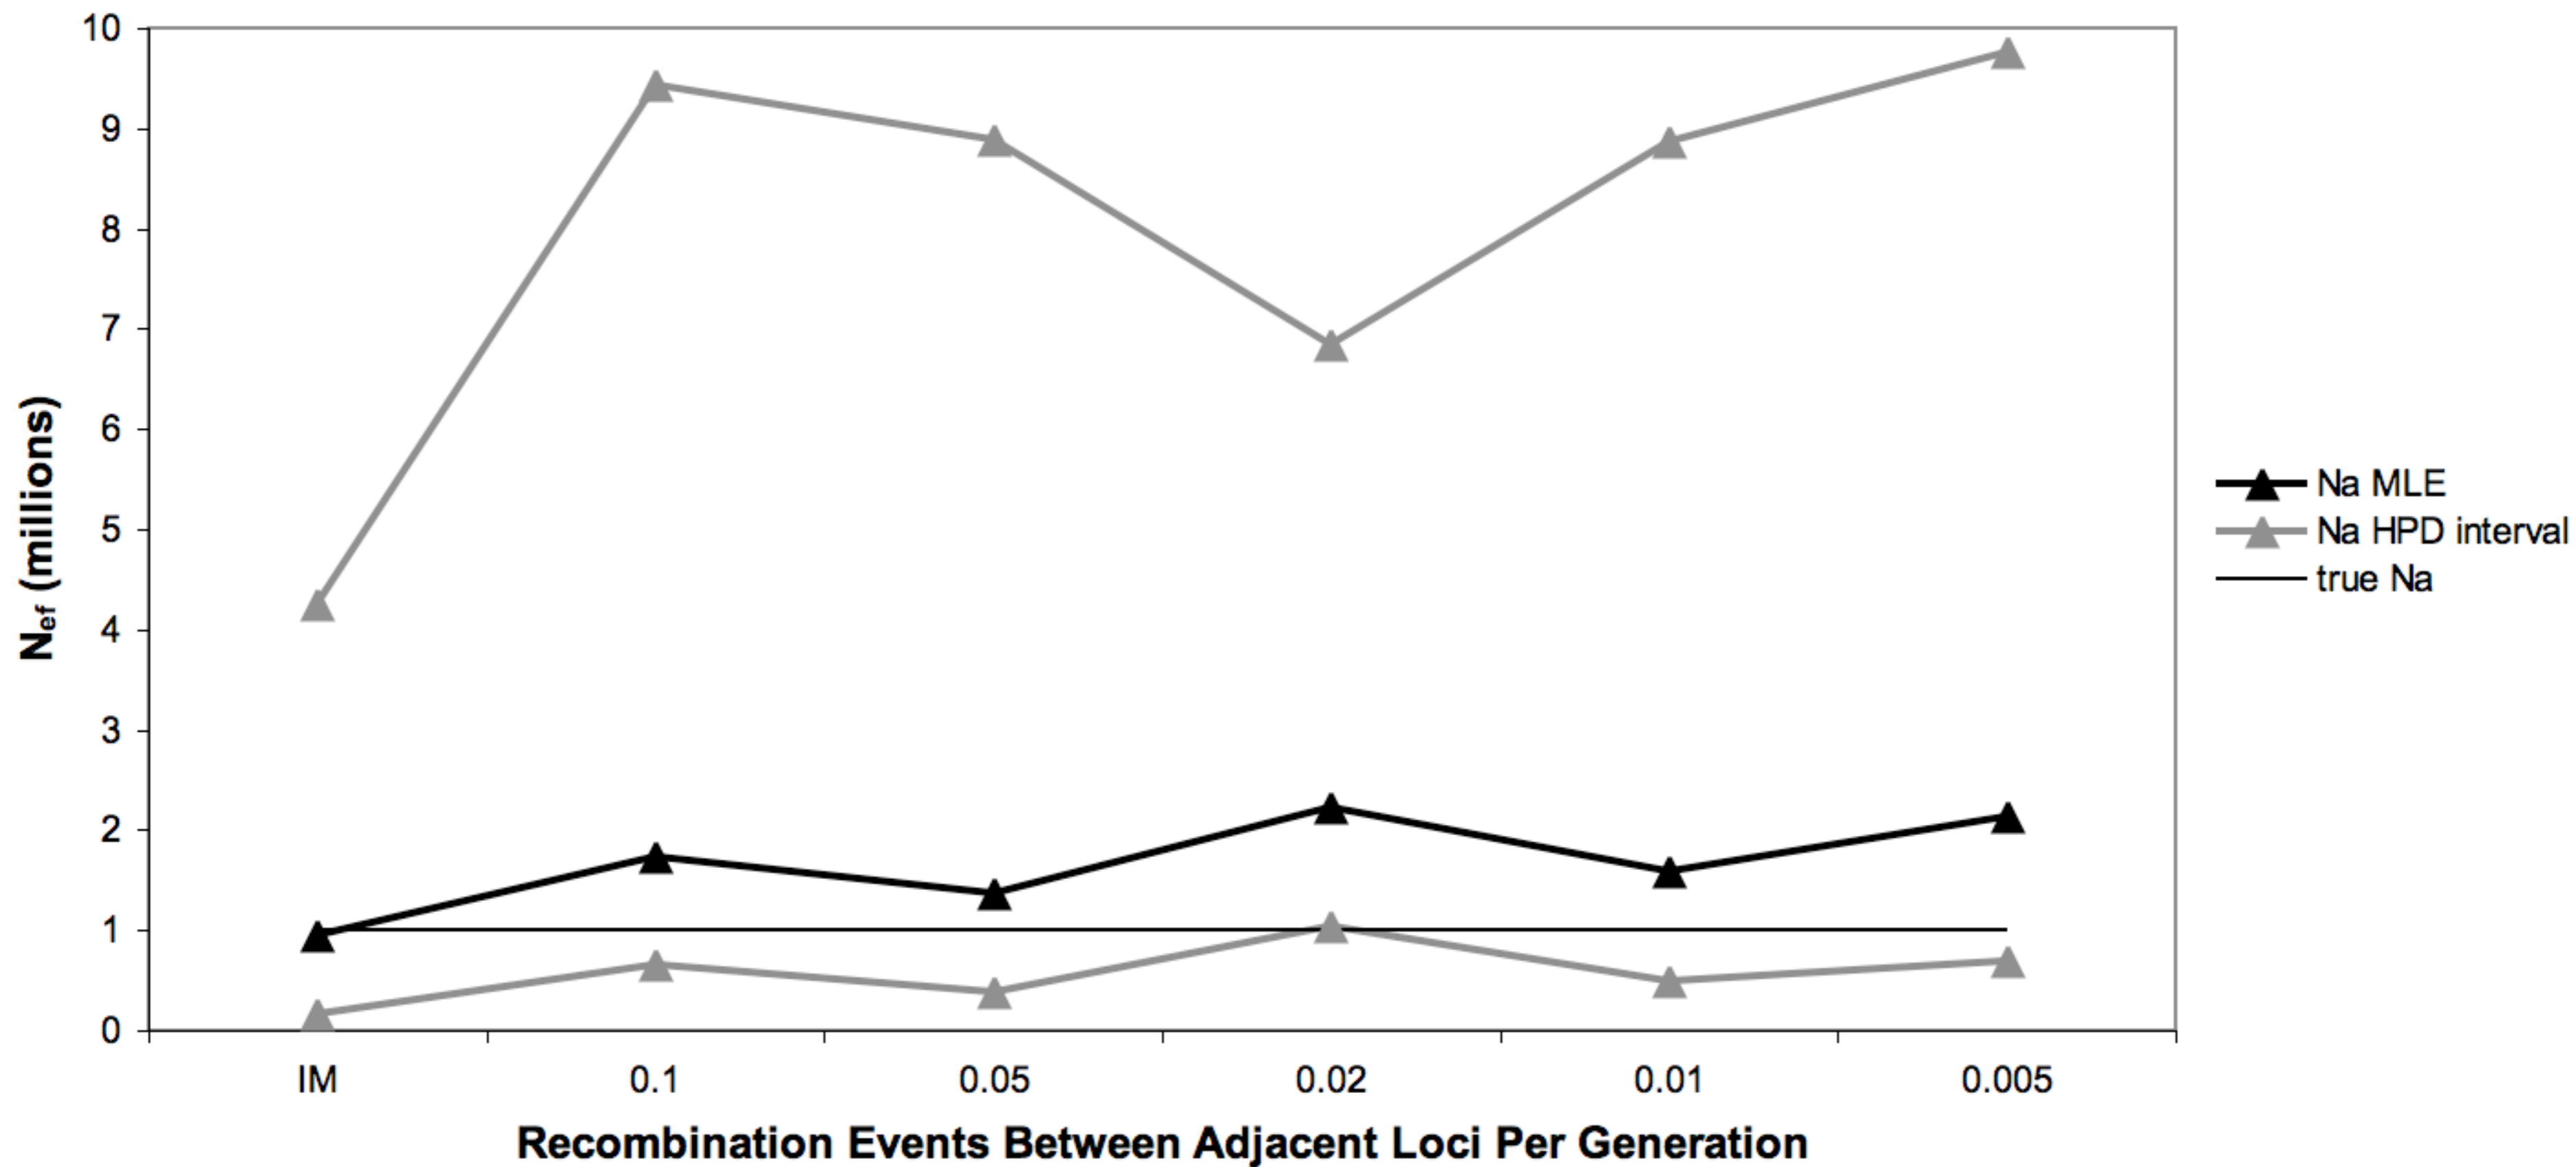

# Divergence Time with Linkage

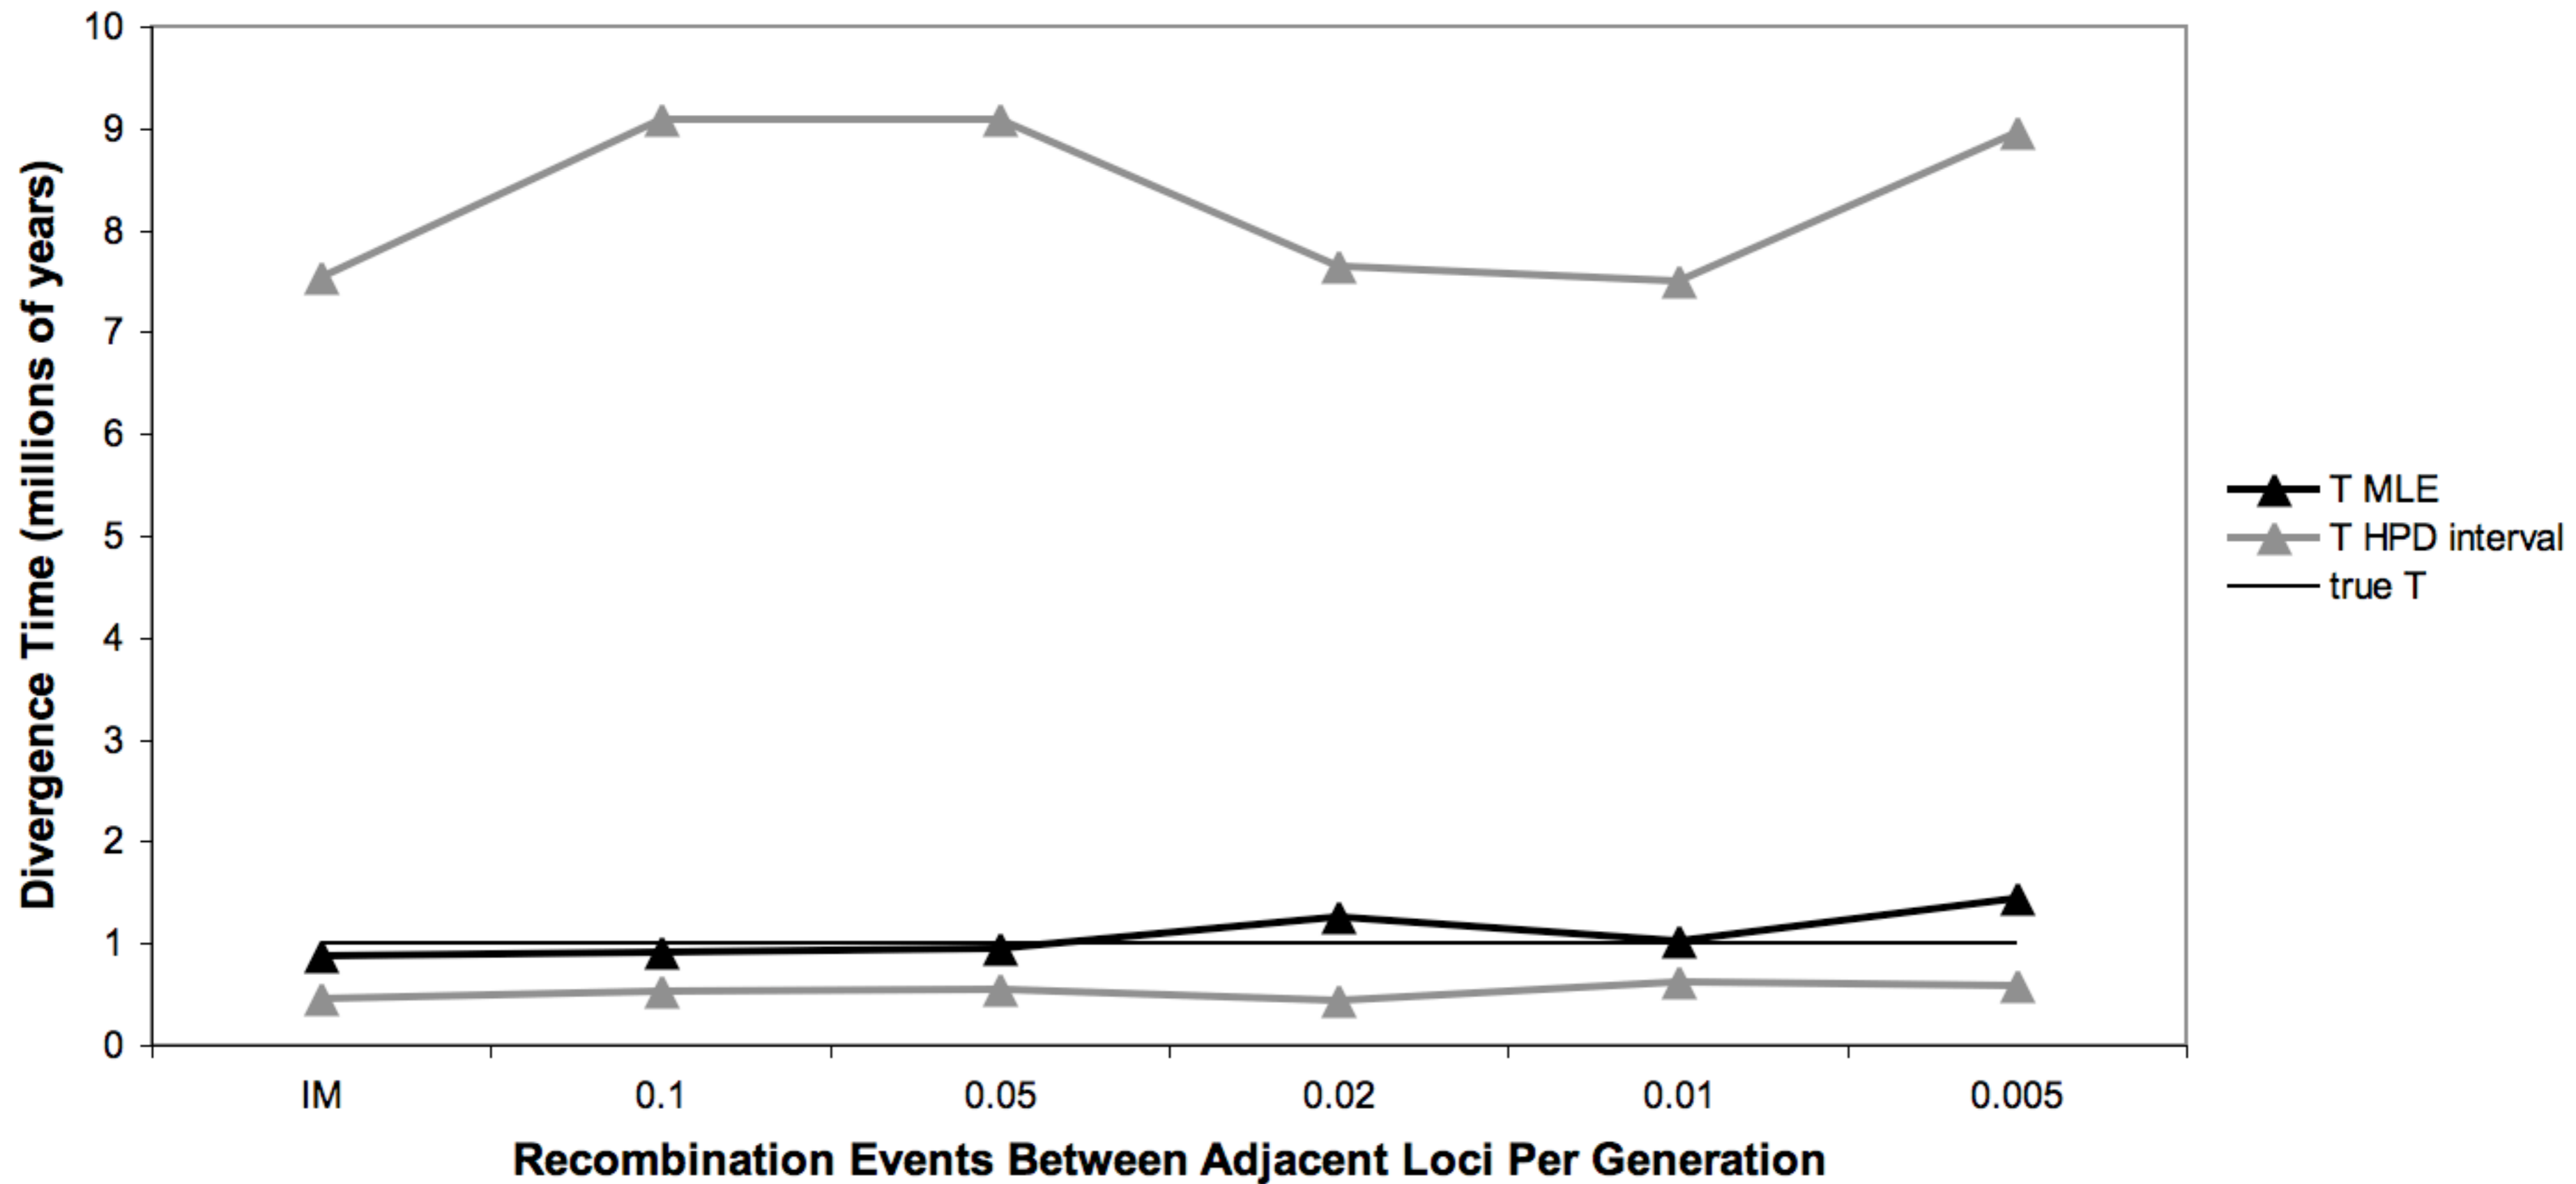

# Gene Flow Rates with Linkage

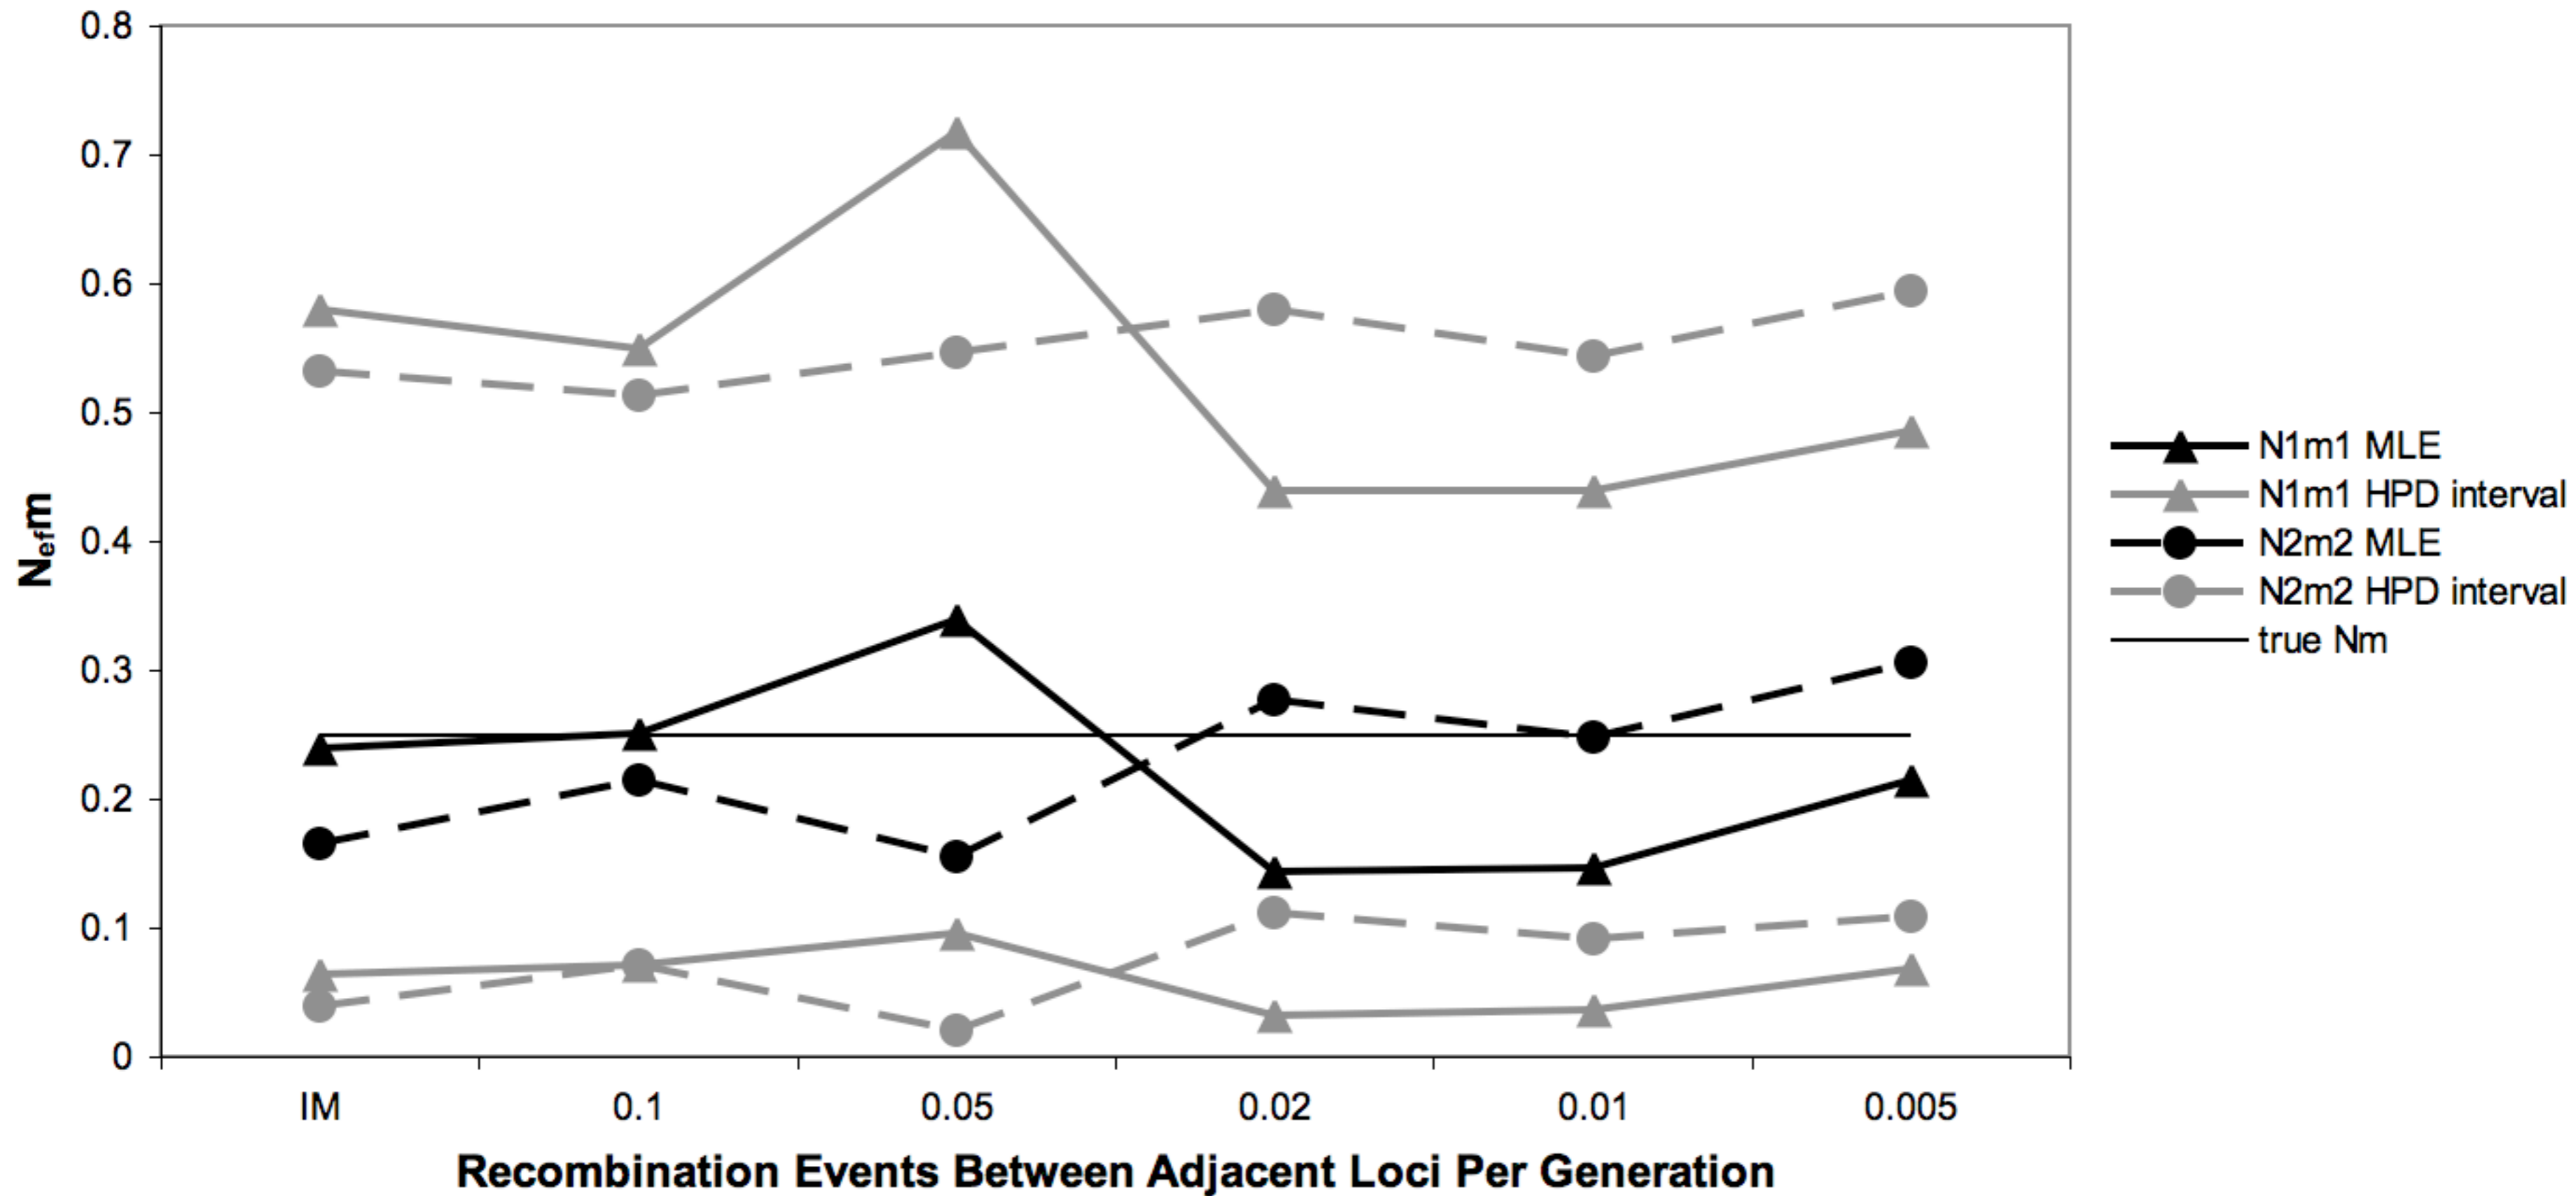

# Percent Coefficient of Variation, Linkage

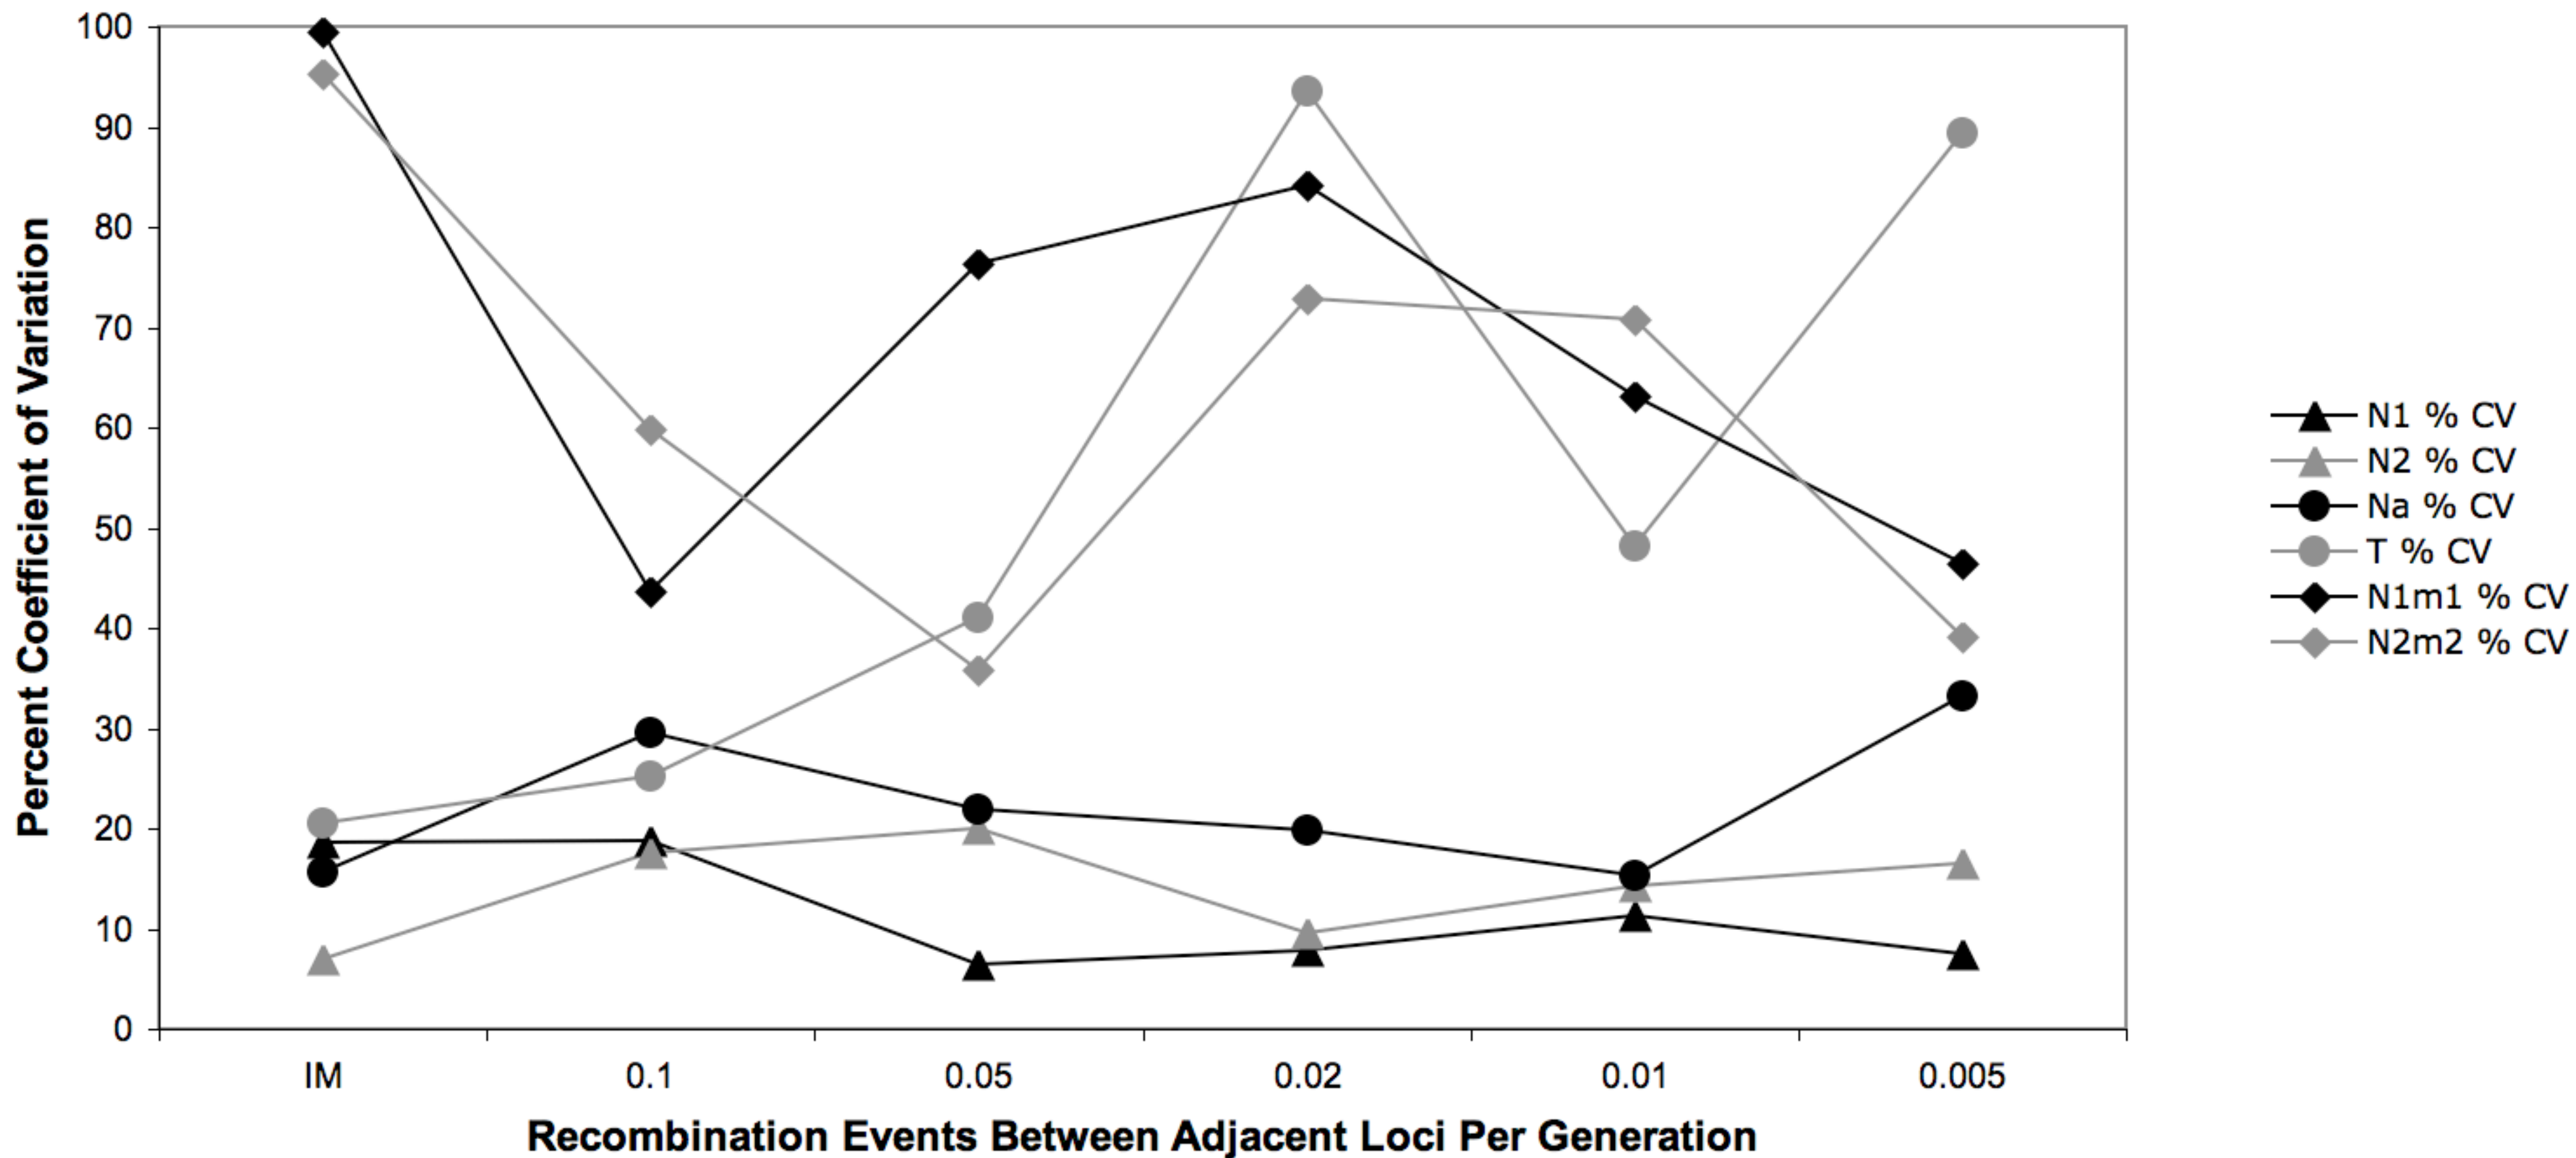

# Current Effective Population Sizes with Divergent Selective Sweep

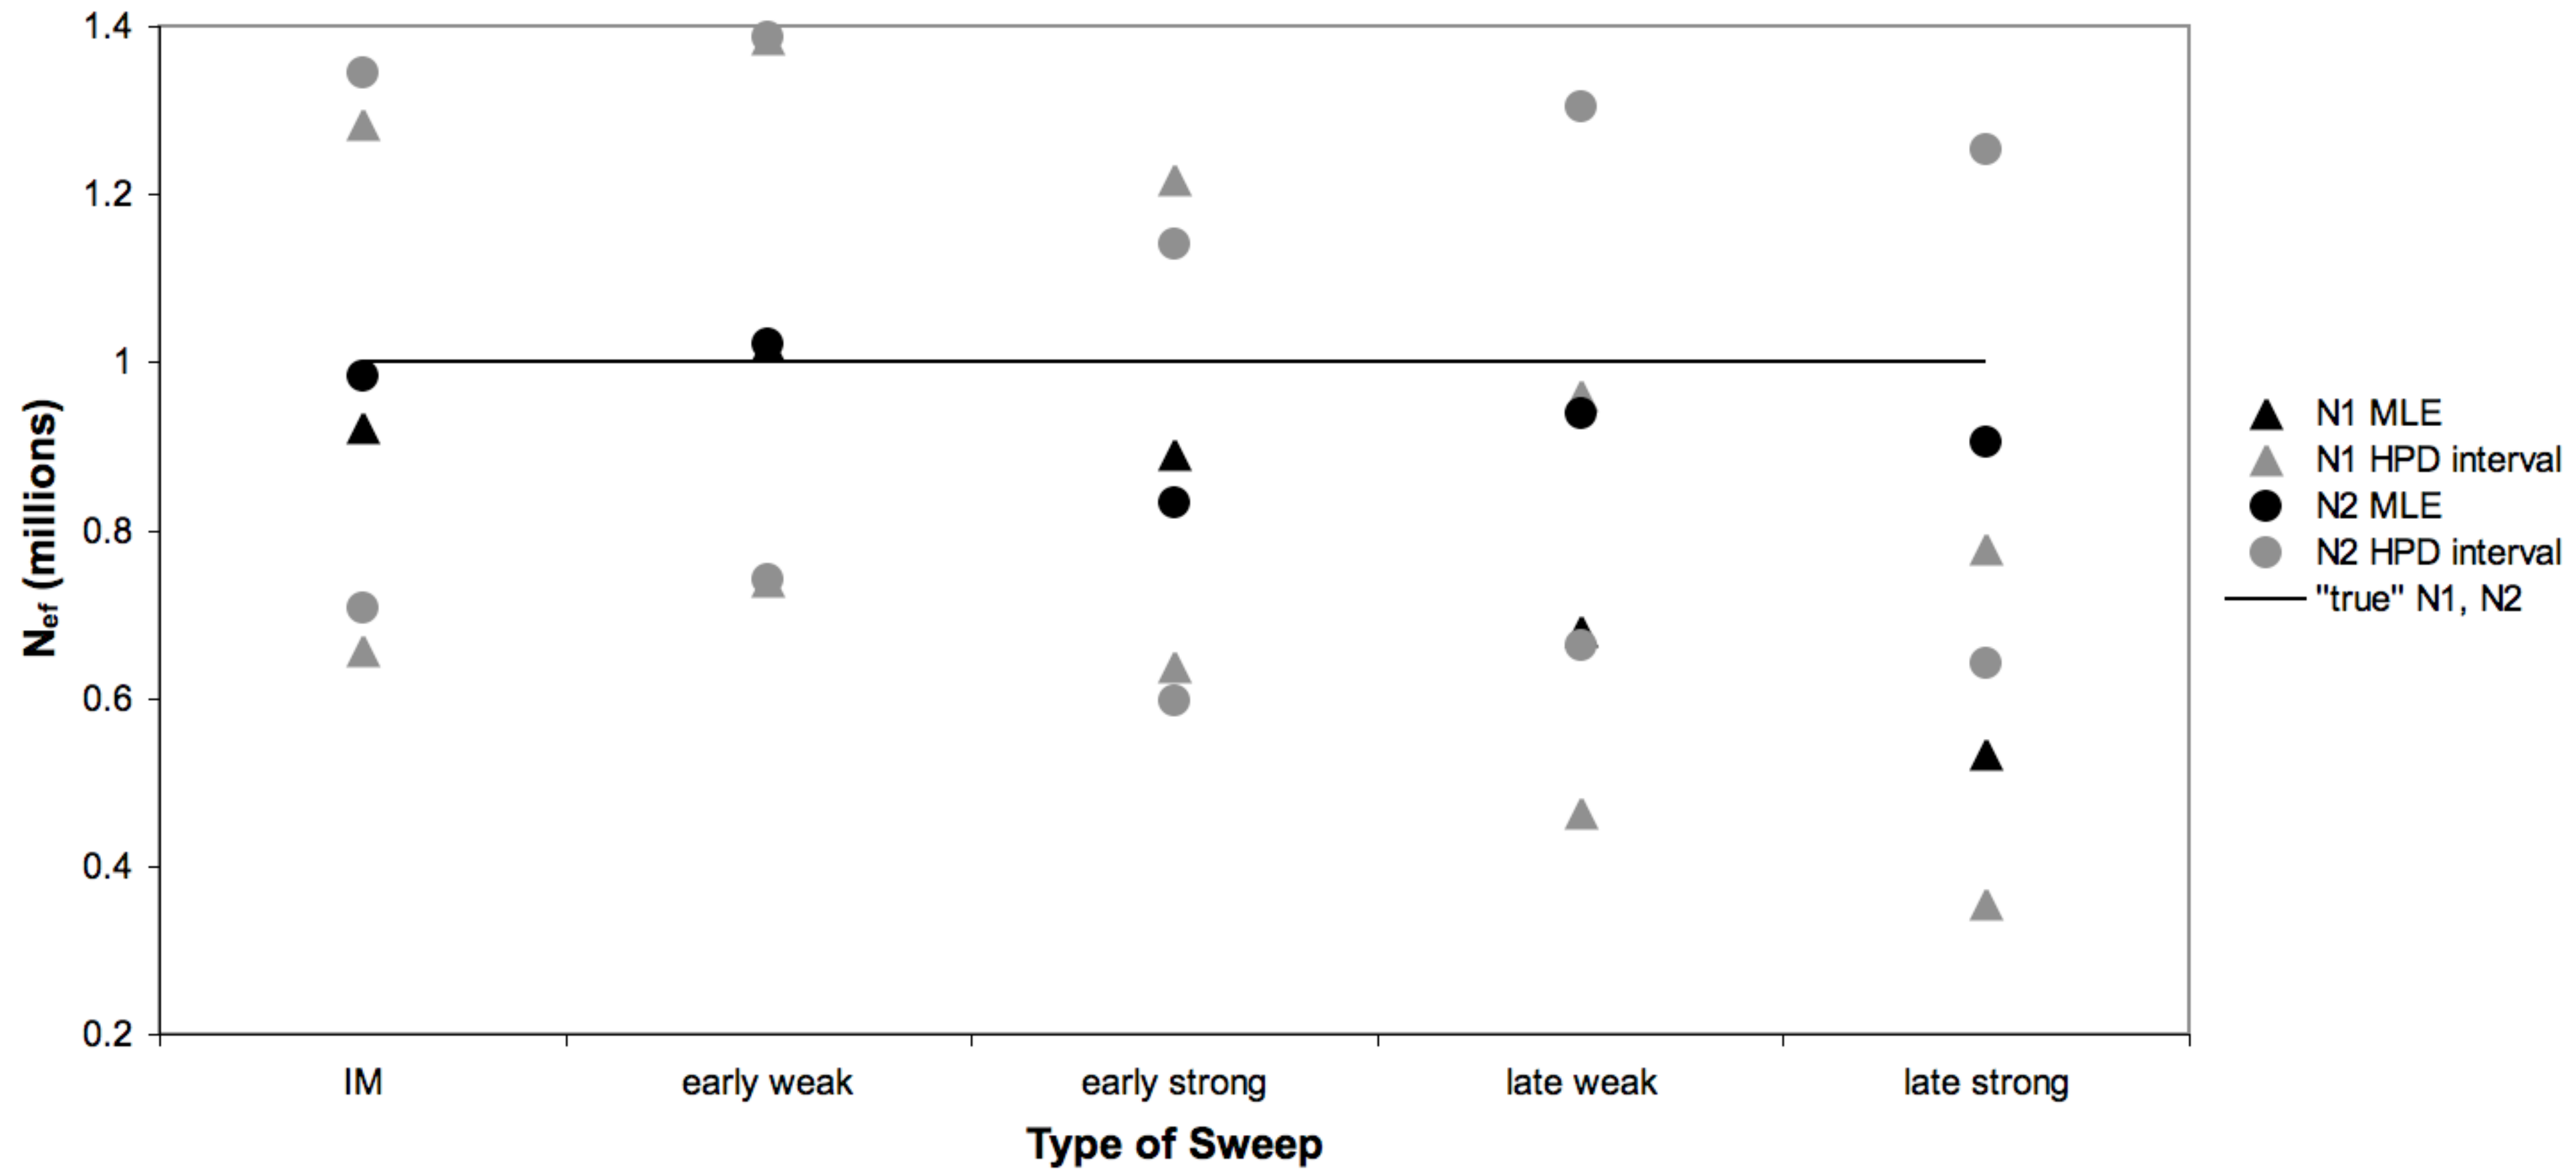



# Ancestral Effective Population Size with Divergent Selective Sweep

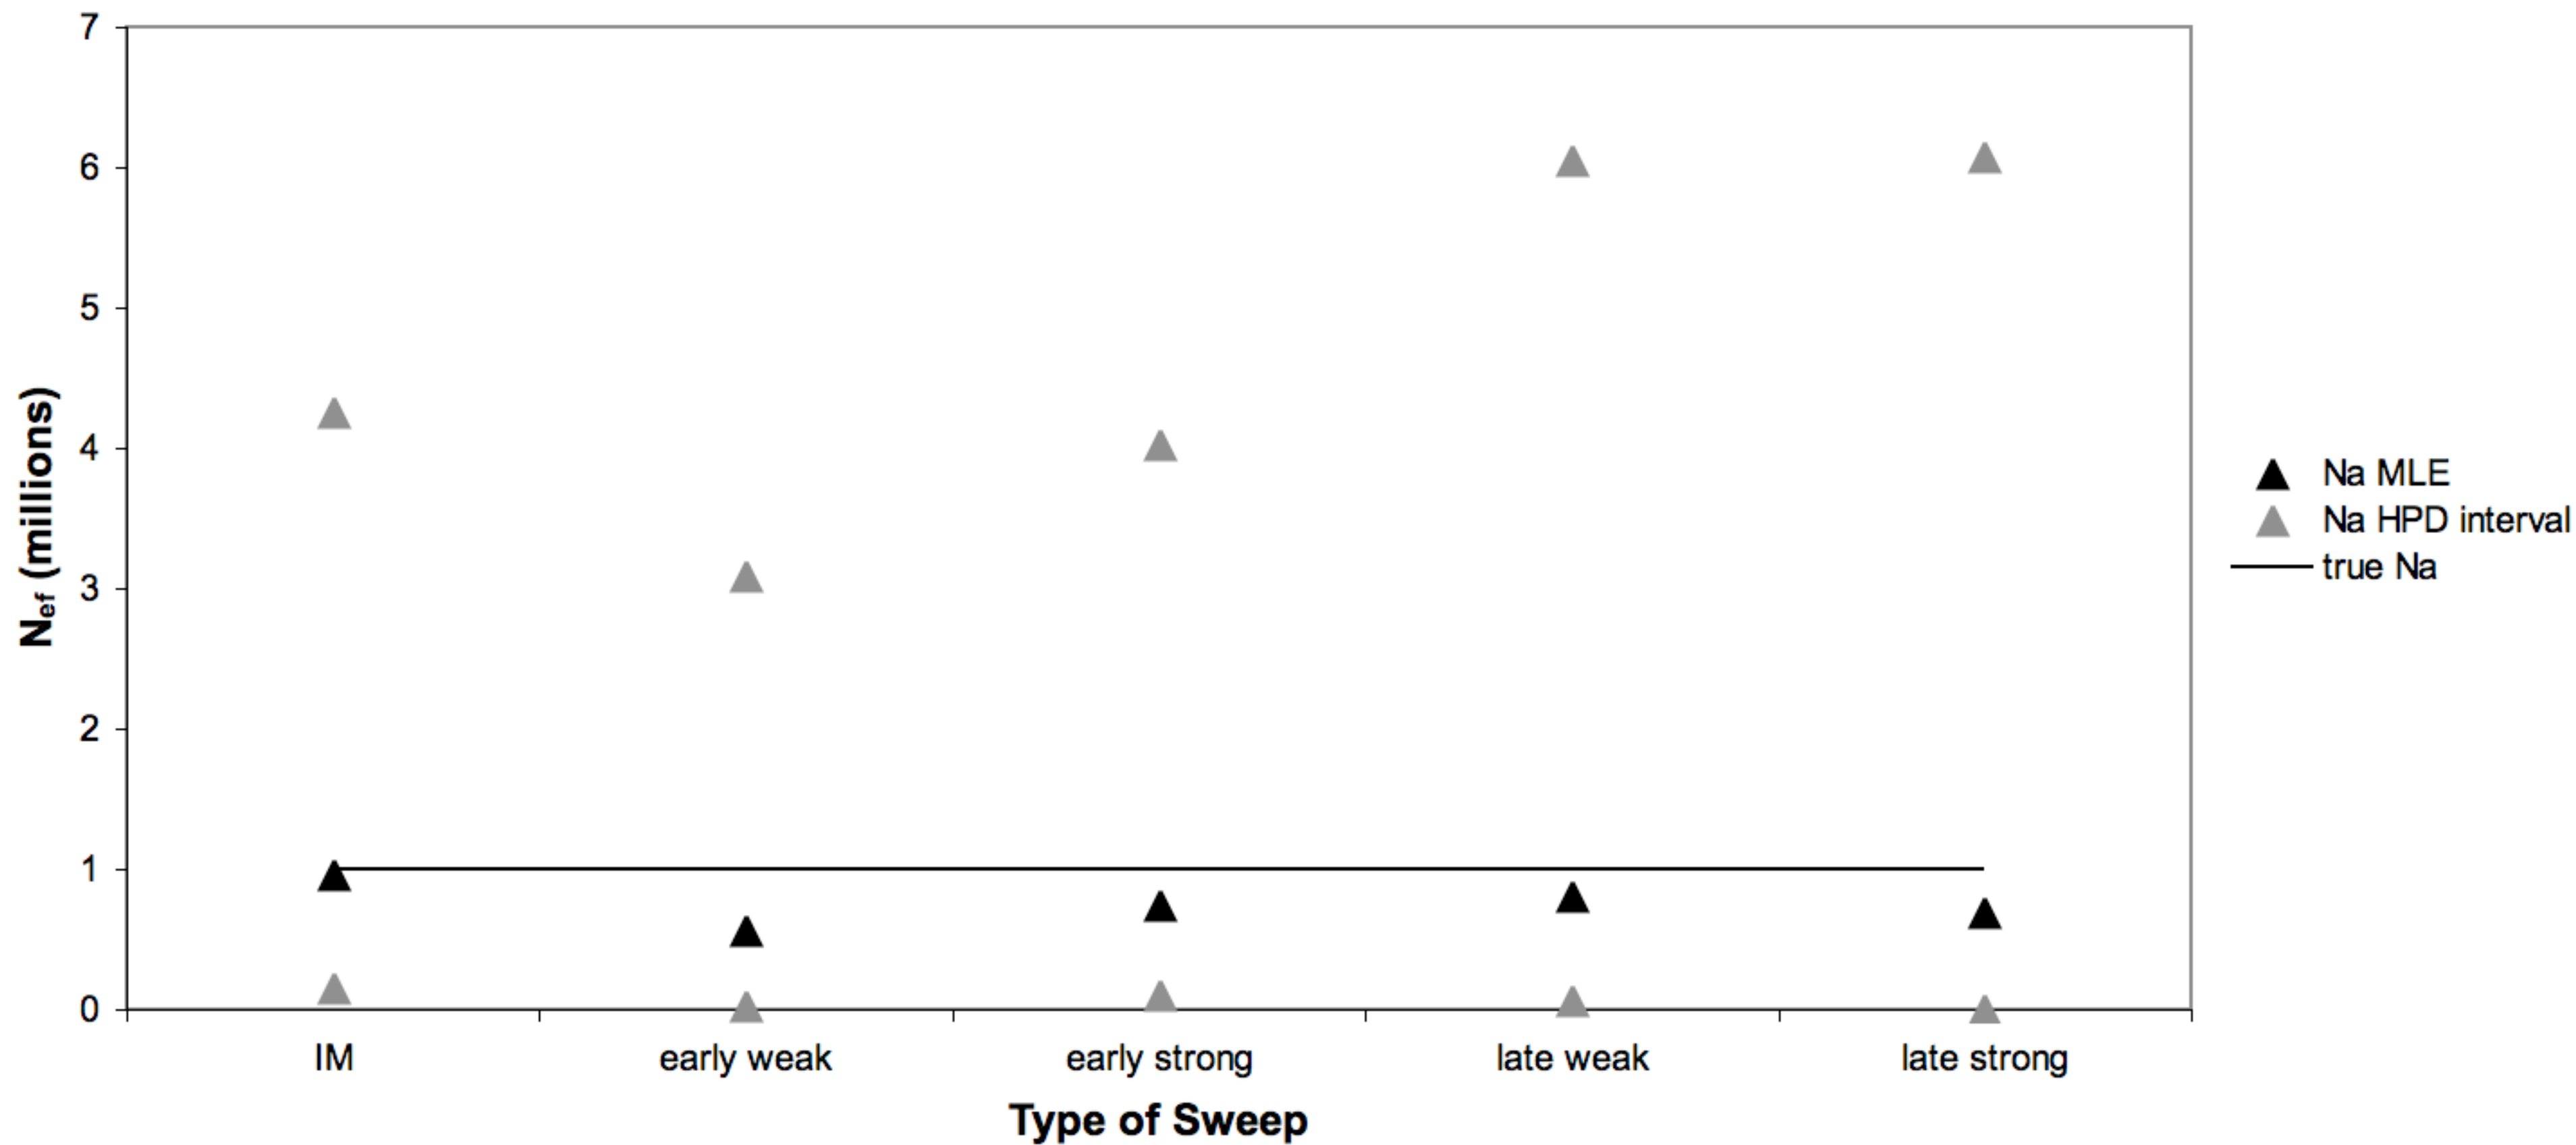

# Divergence Time with Divergent Selective Sweep

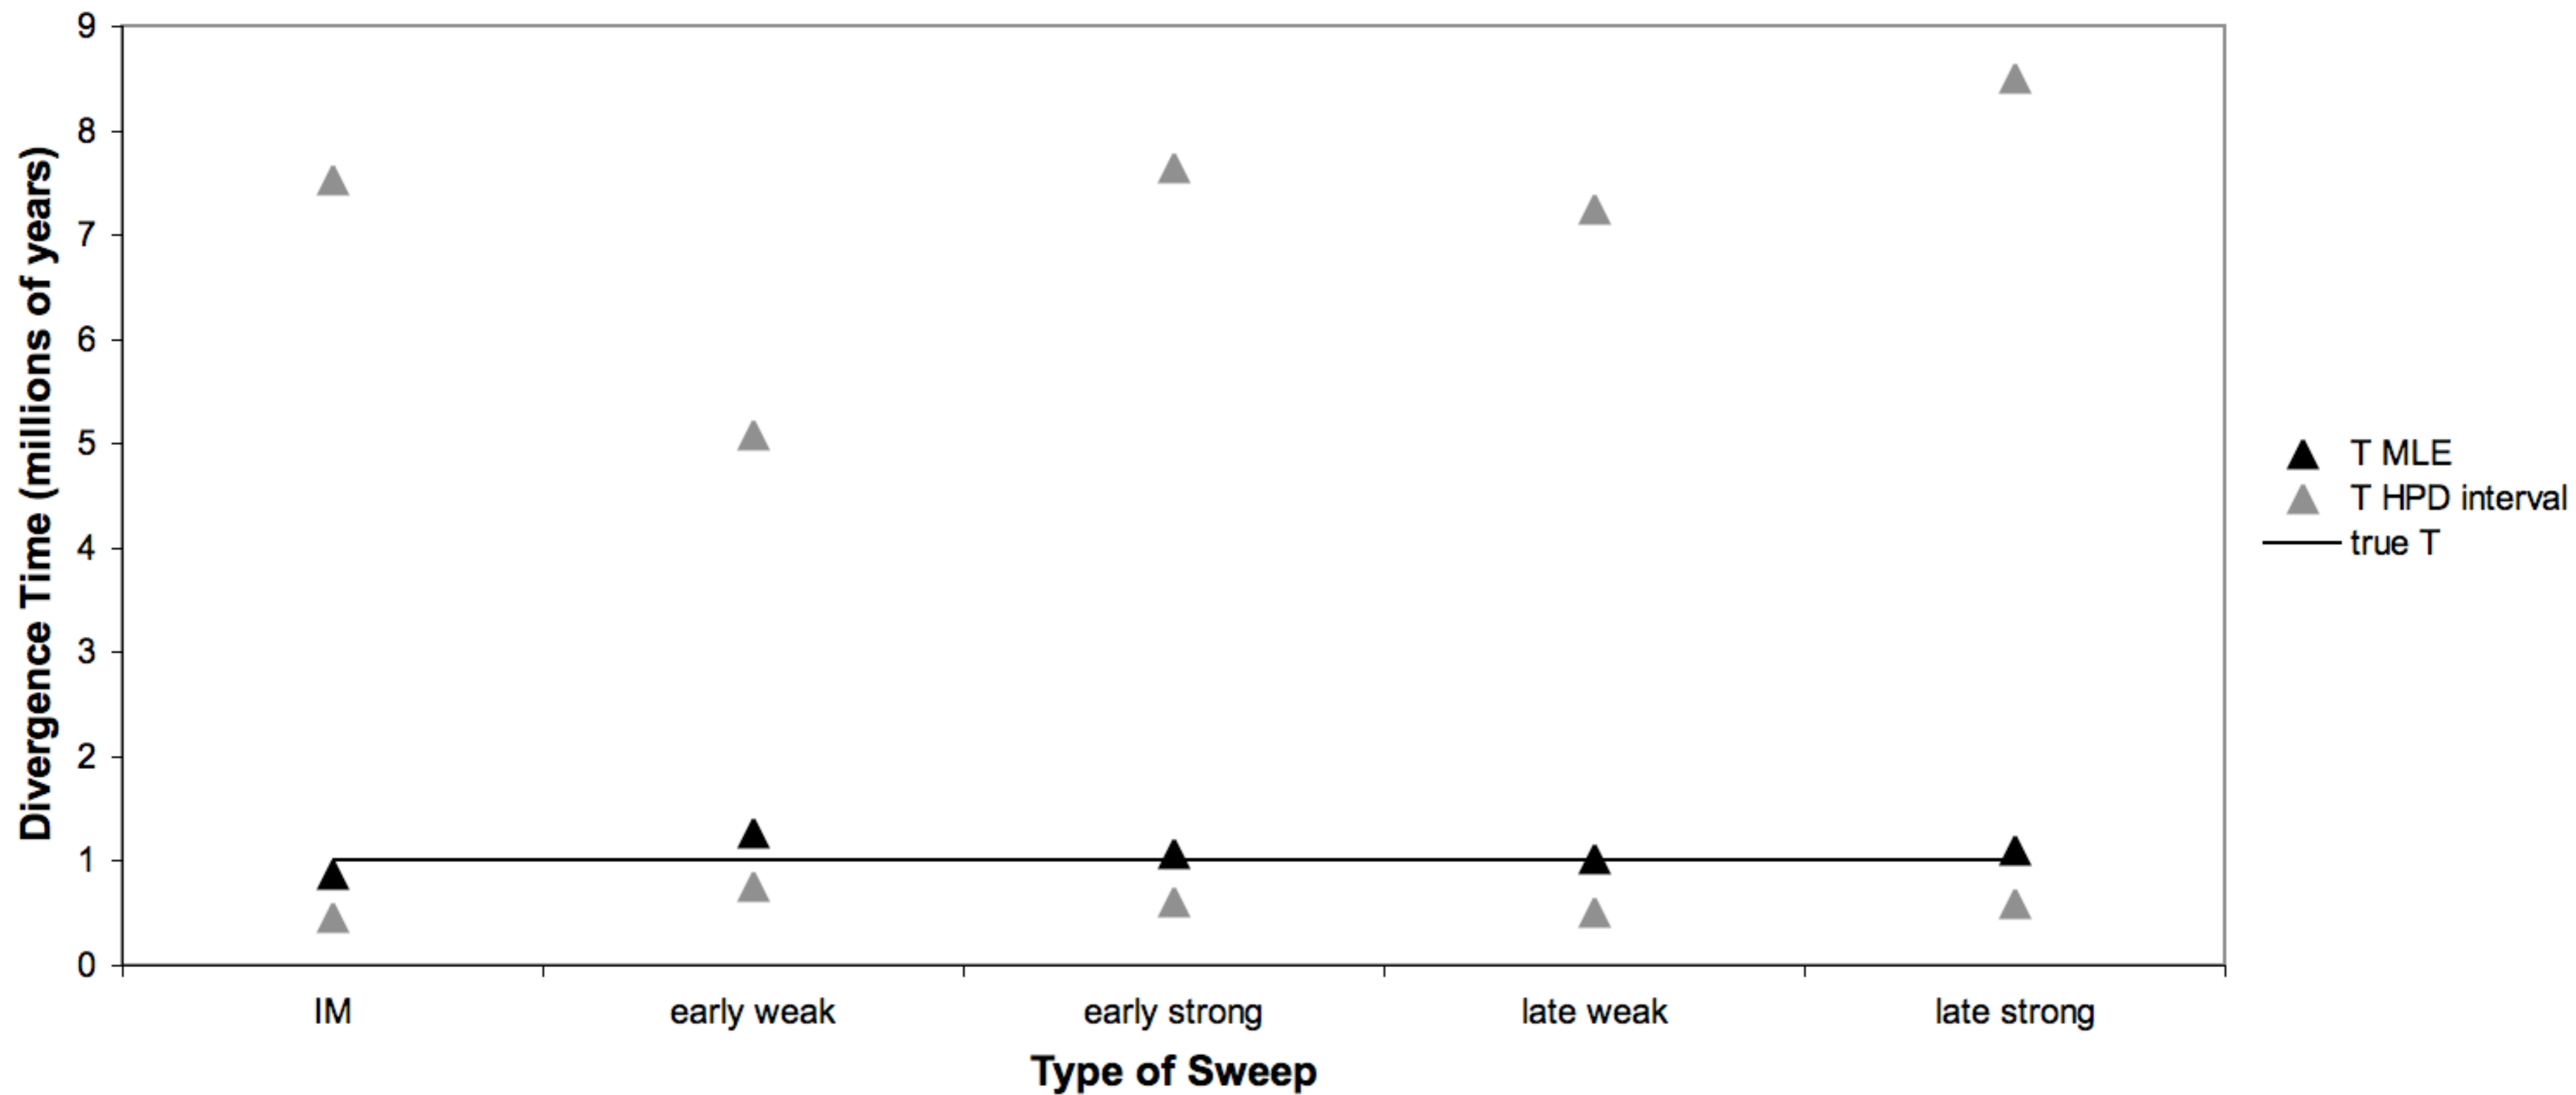

# Gene Flow Rates with Divergent Selective Sweep

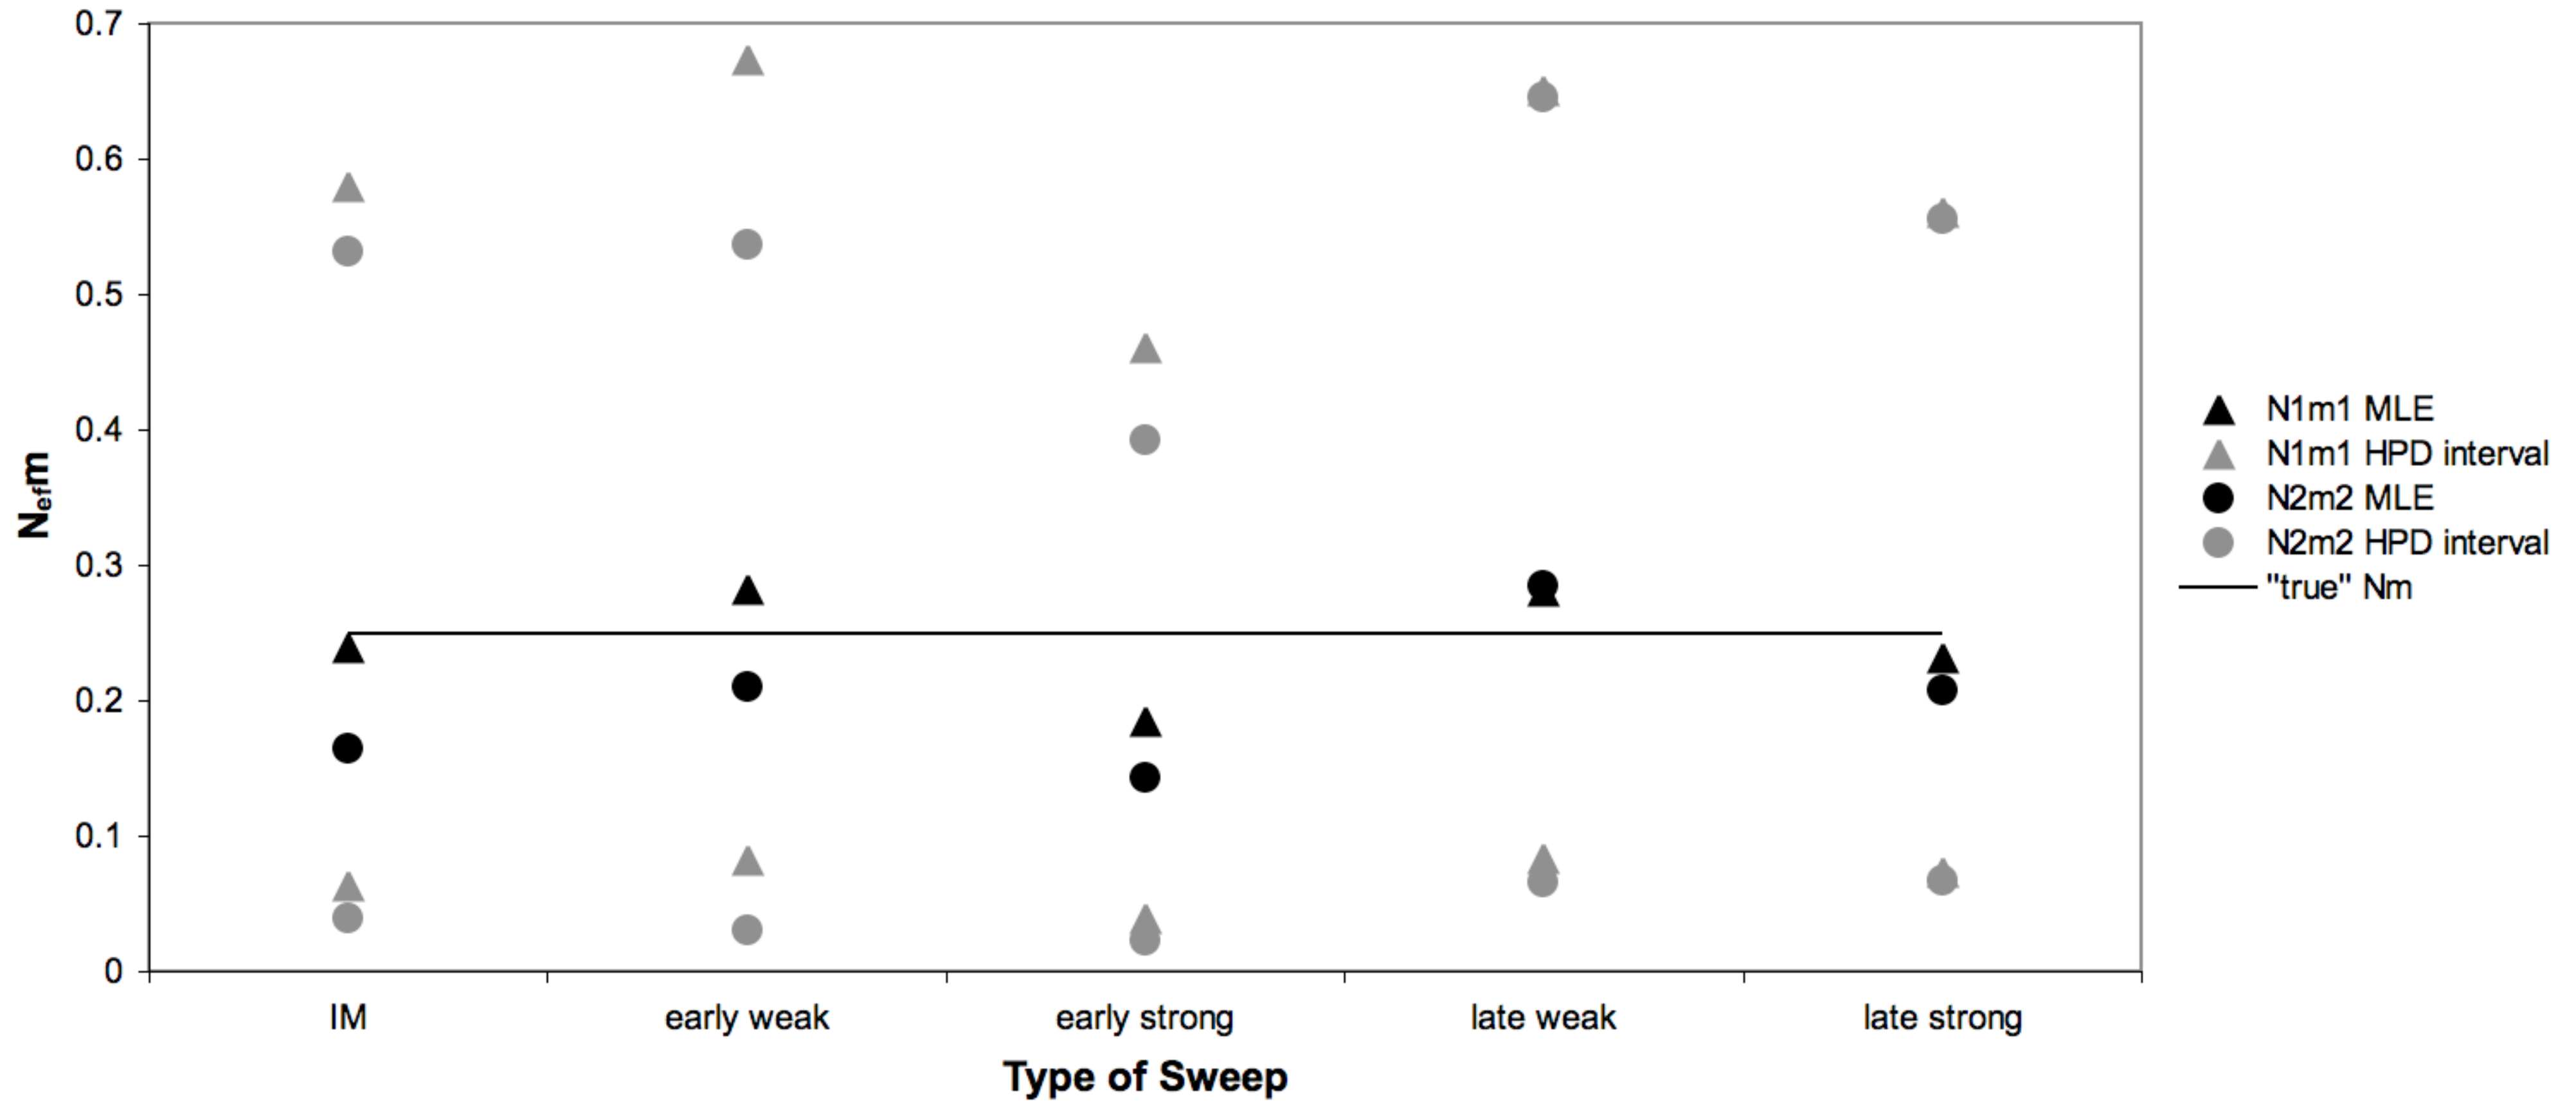

# Percent Coefficient of Variation, Divergent Selective Sweep

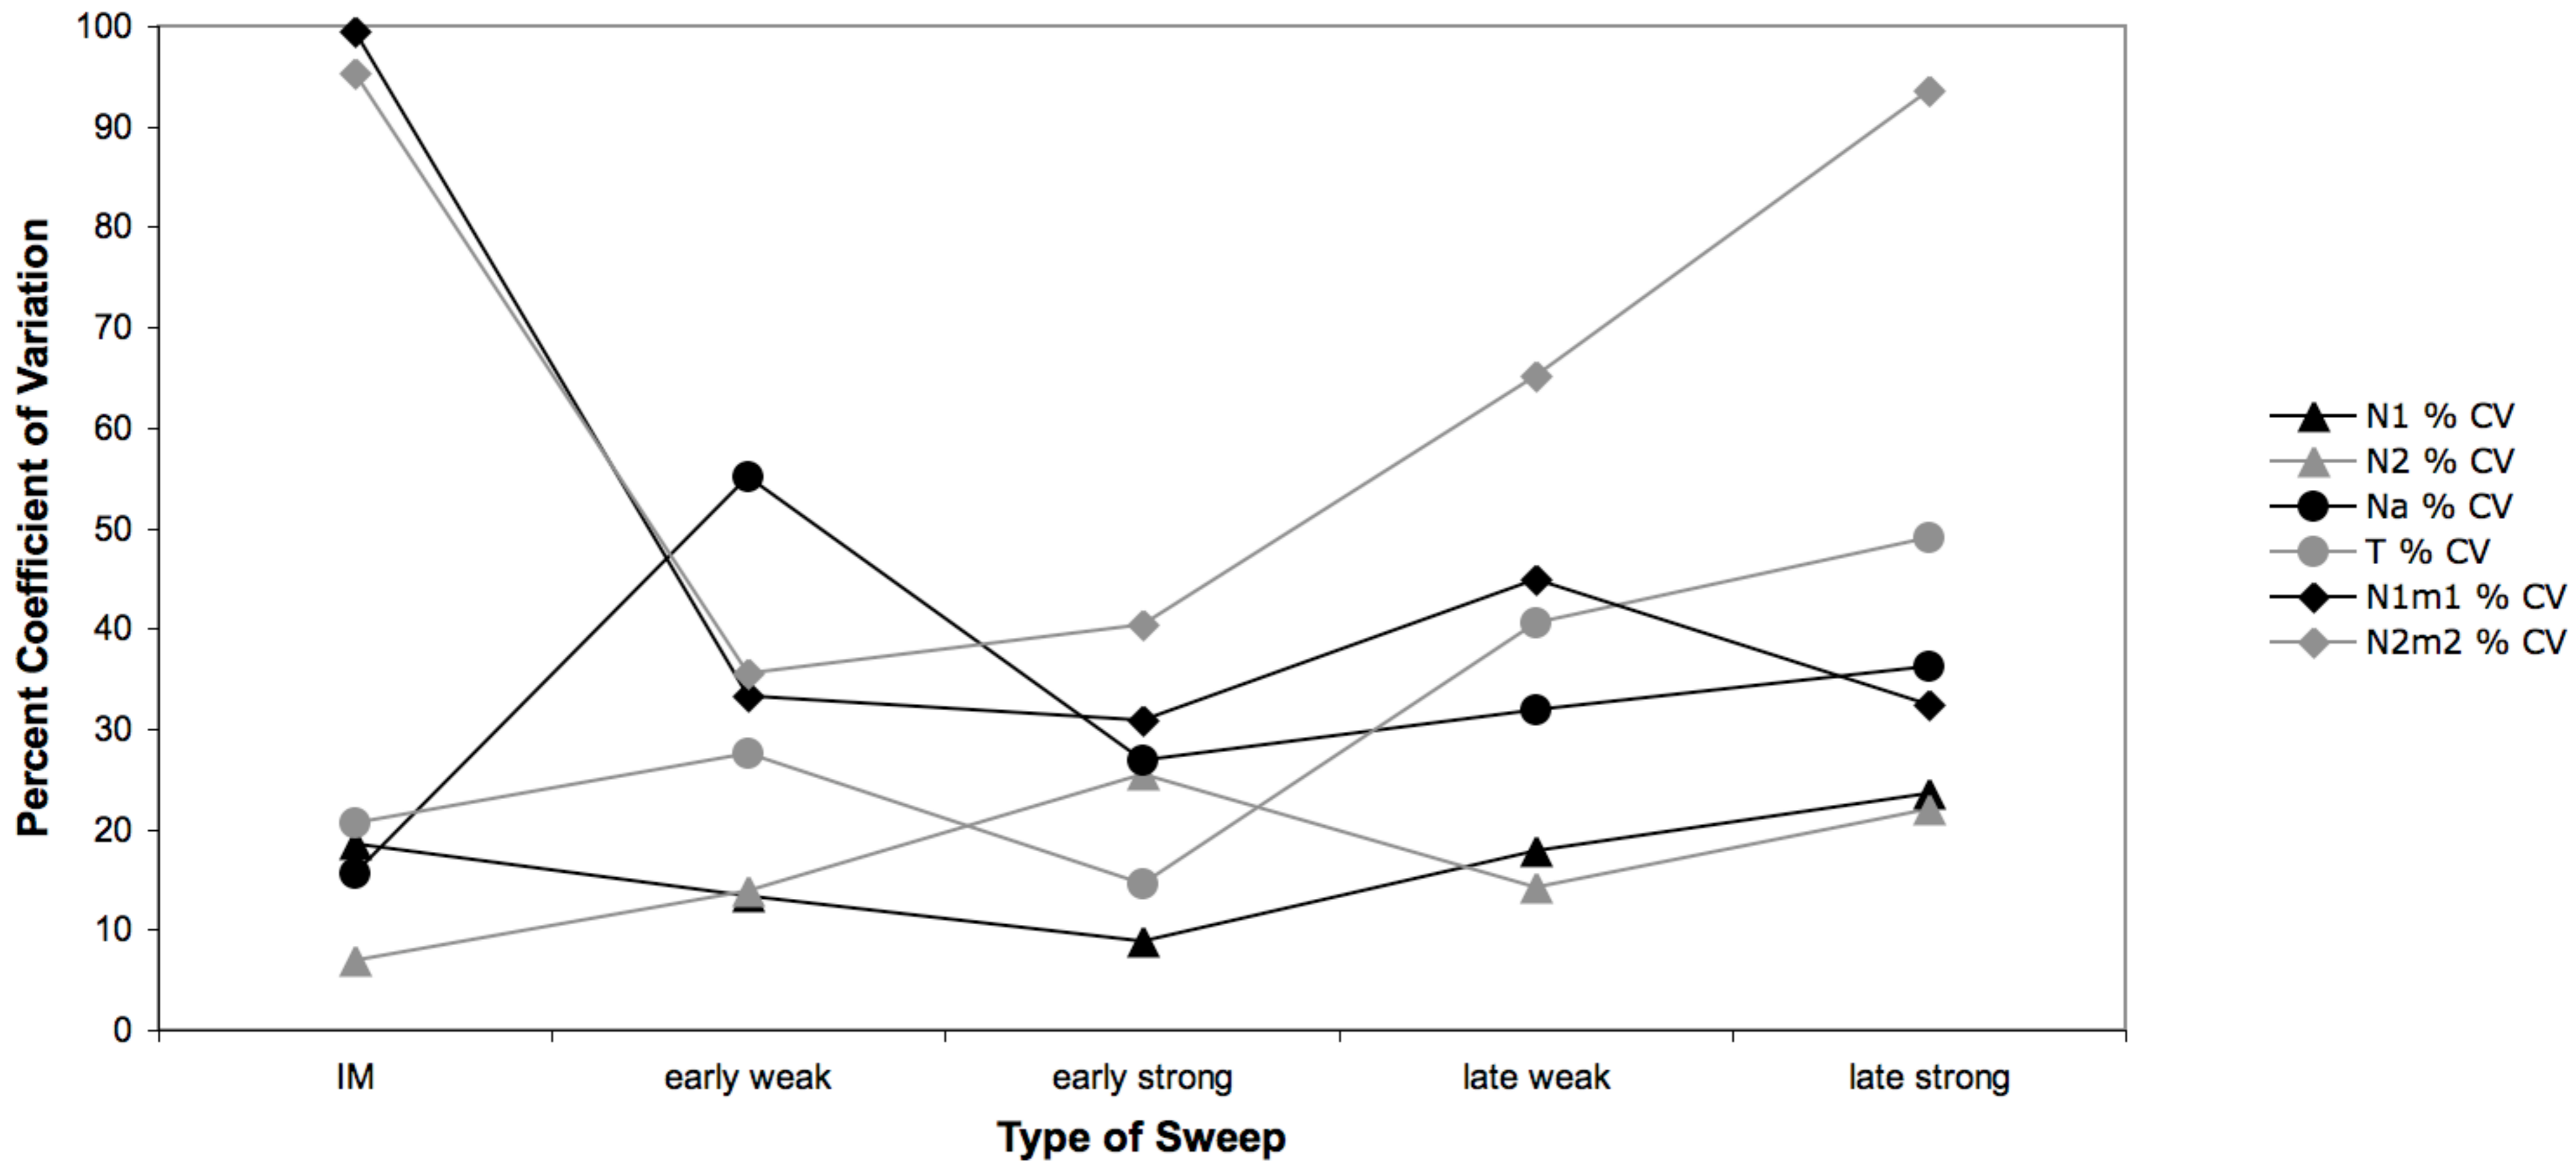

# Effective Population Sizes and Divergence Time with Complex Demographic Scenario, Exponential Growth

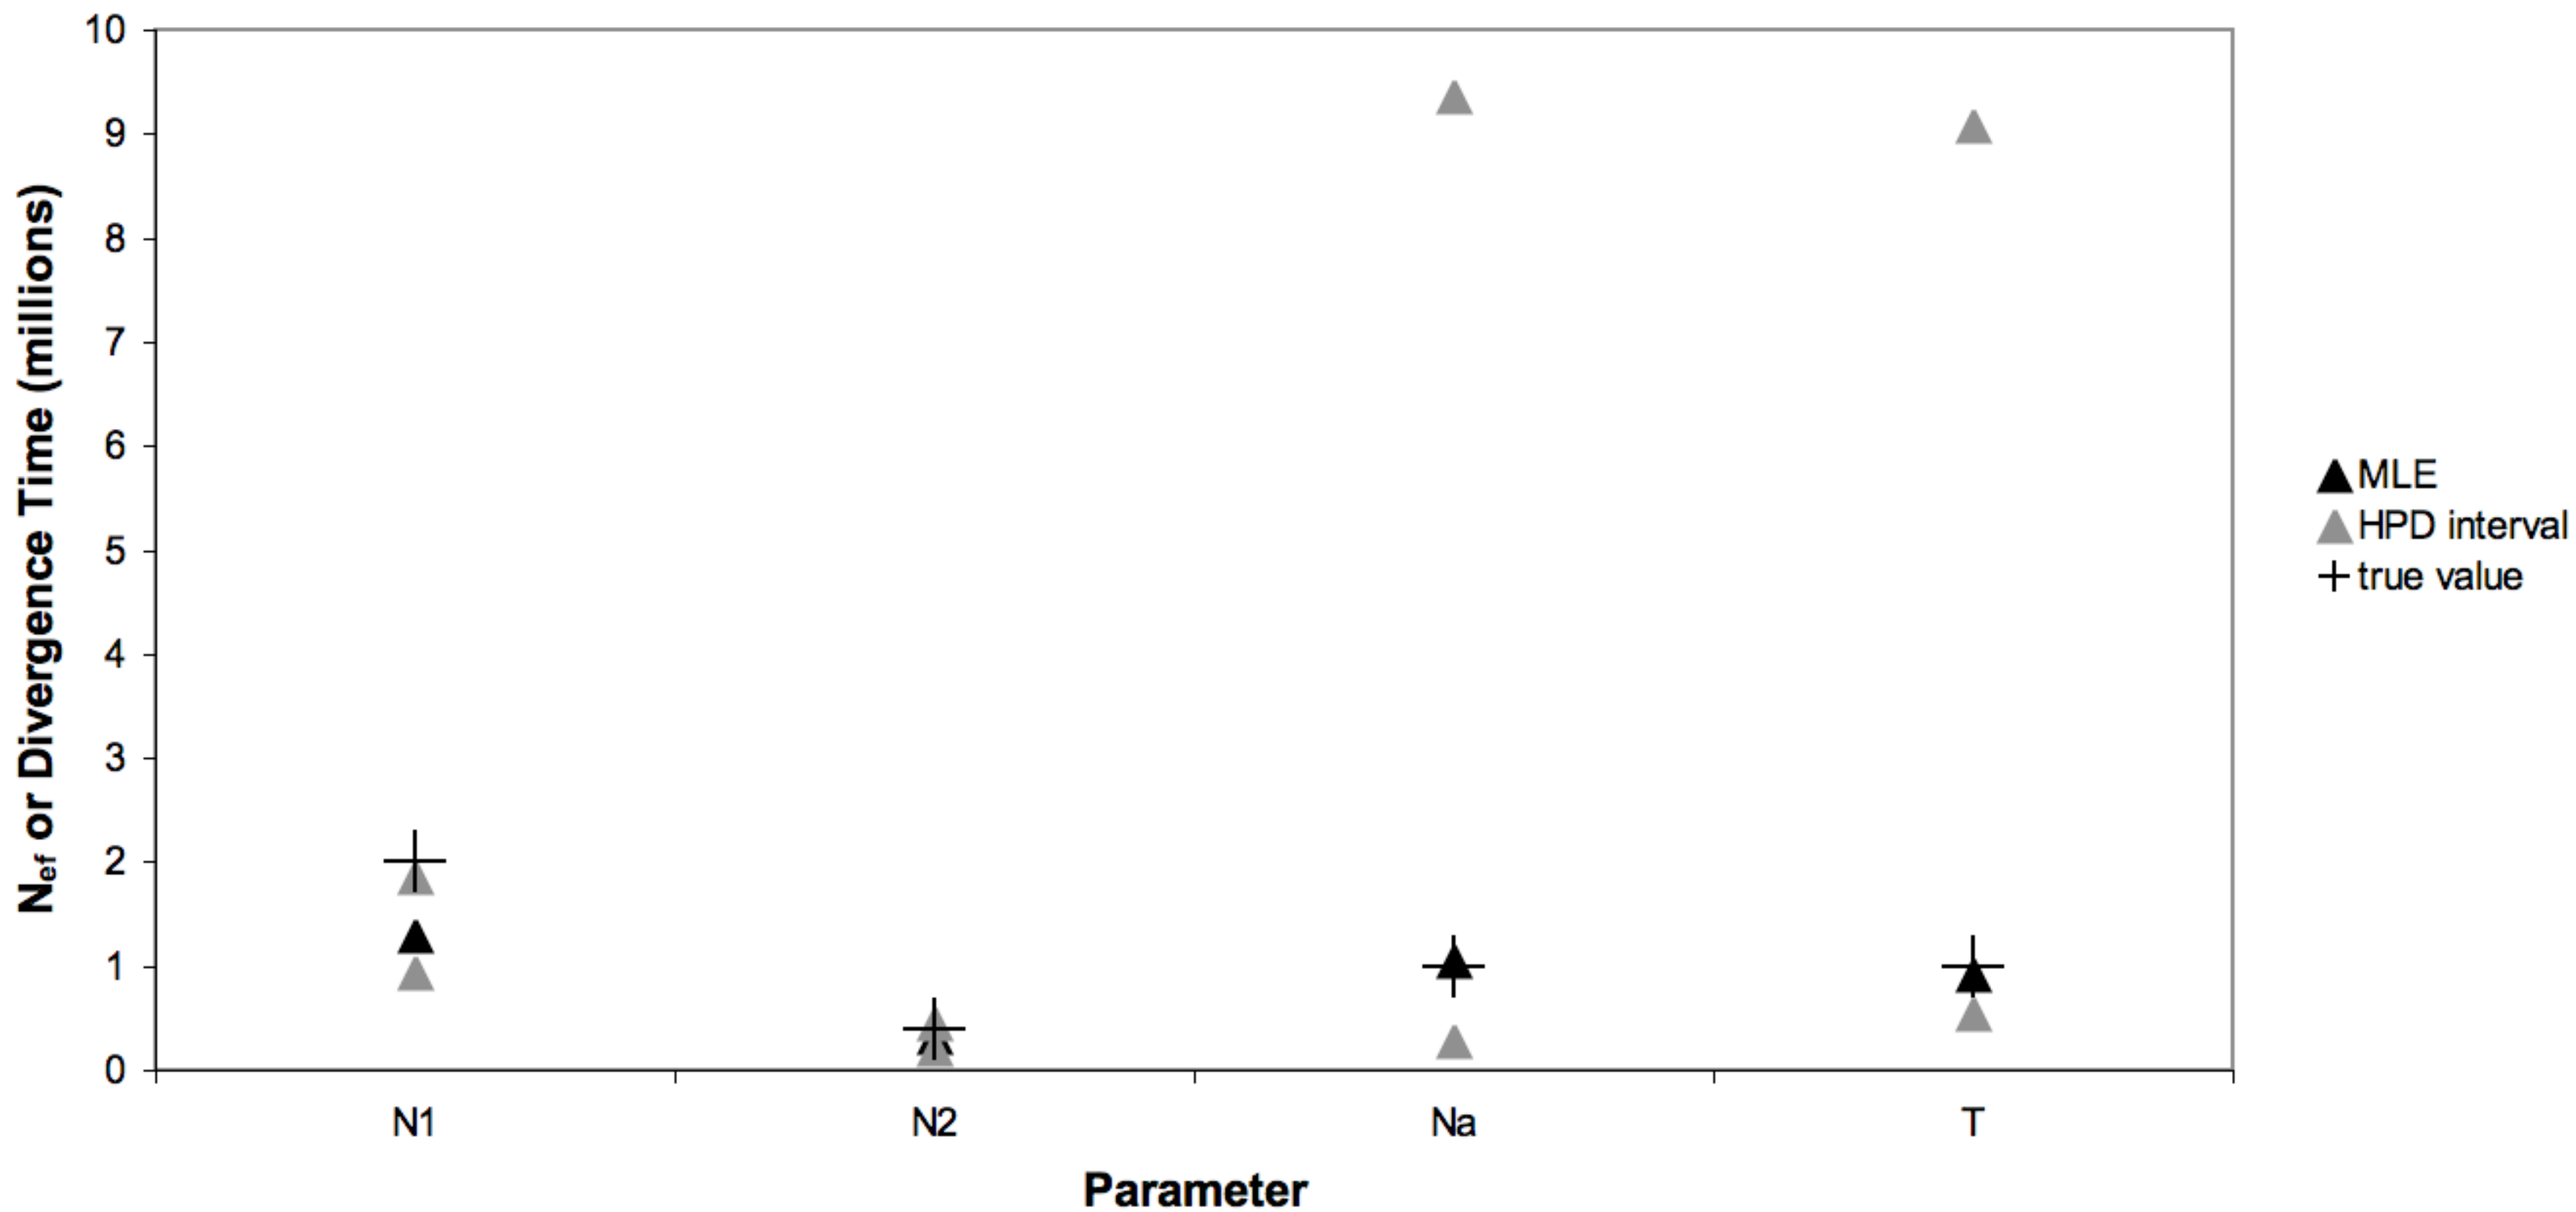

# Gene Flow Rates with Complex Demographic Scenario, Exponential Growth

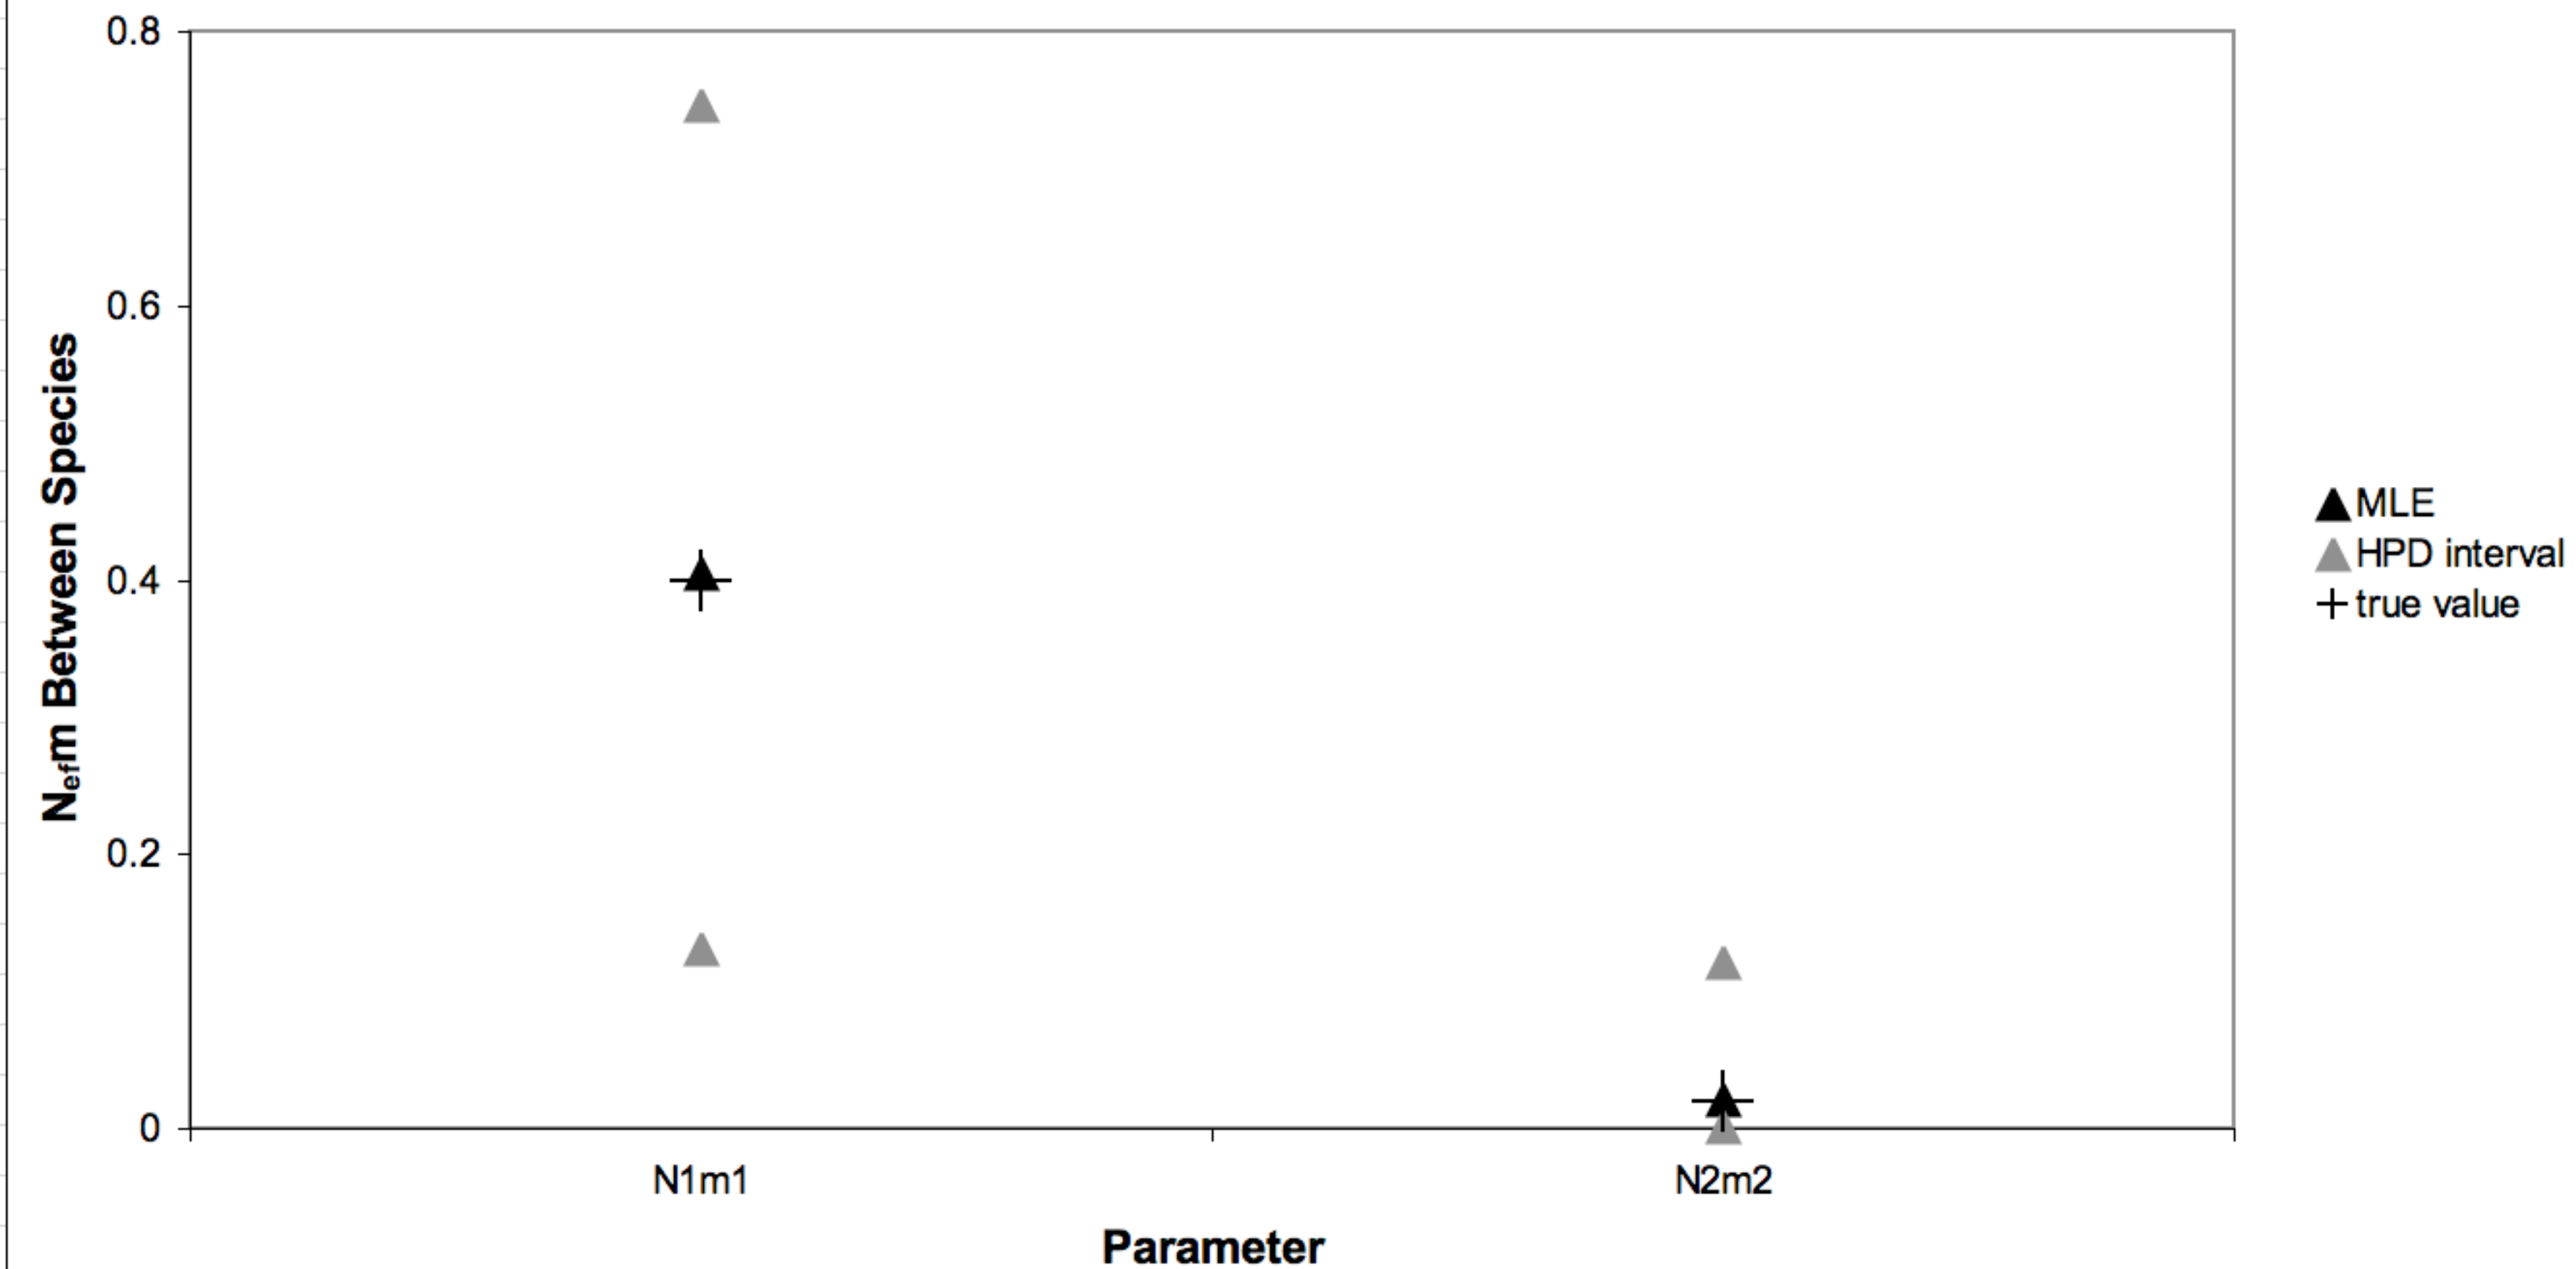

# Effective Population Sizes and Divergence Time with Complex Demographic Scenario, Instantaneous Growth

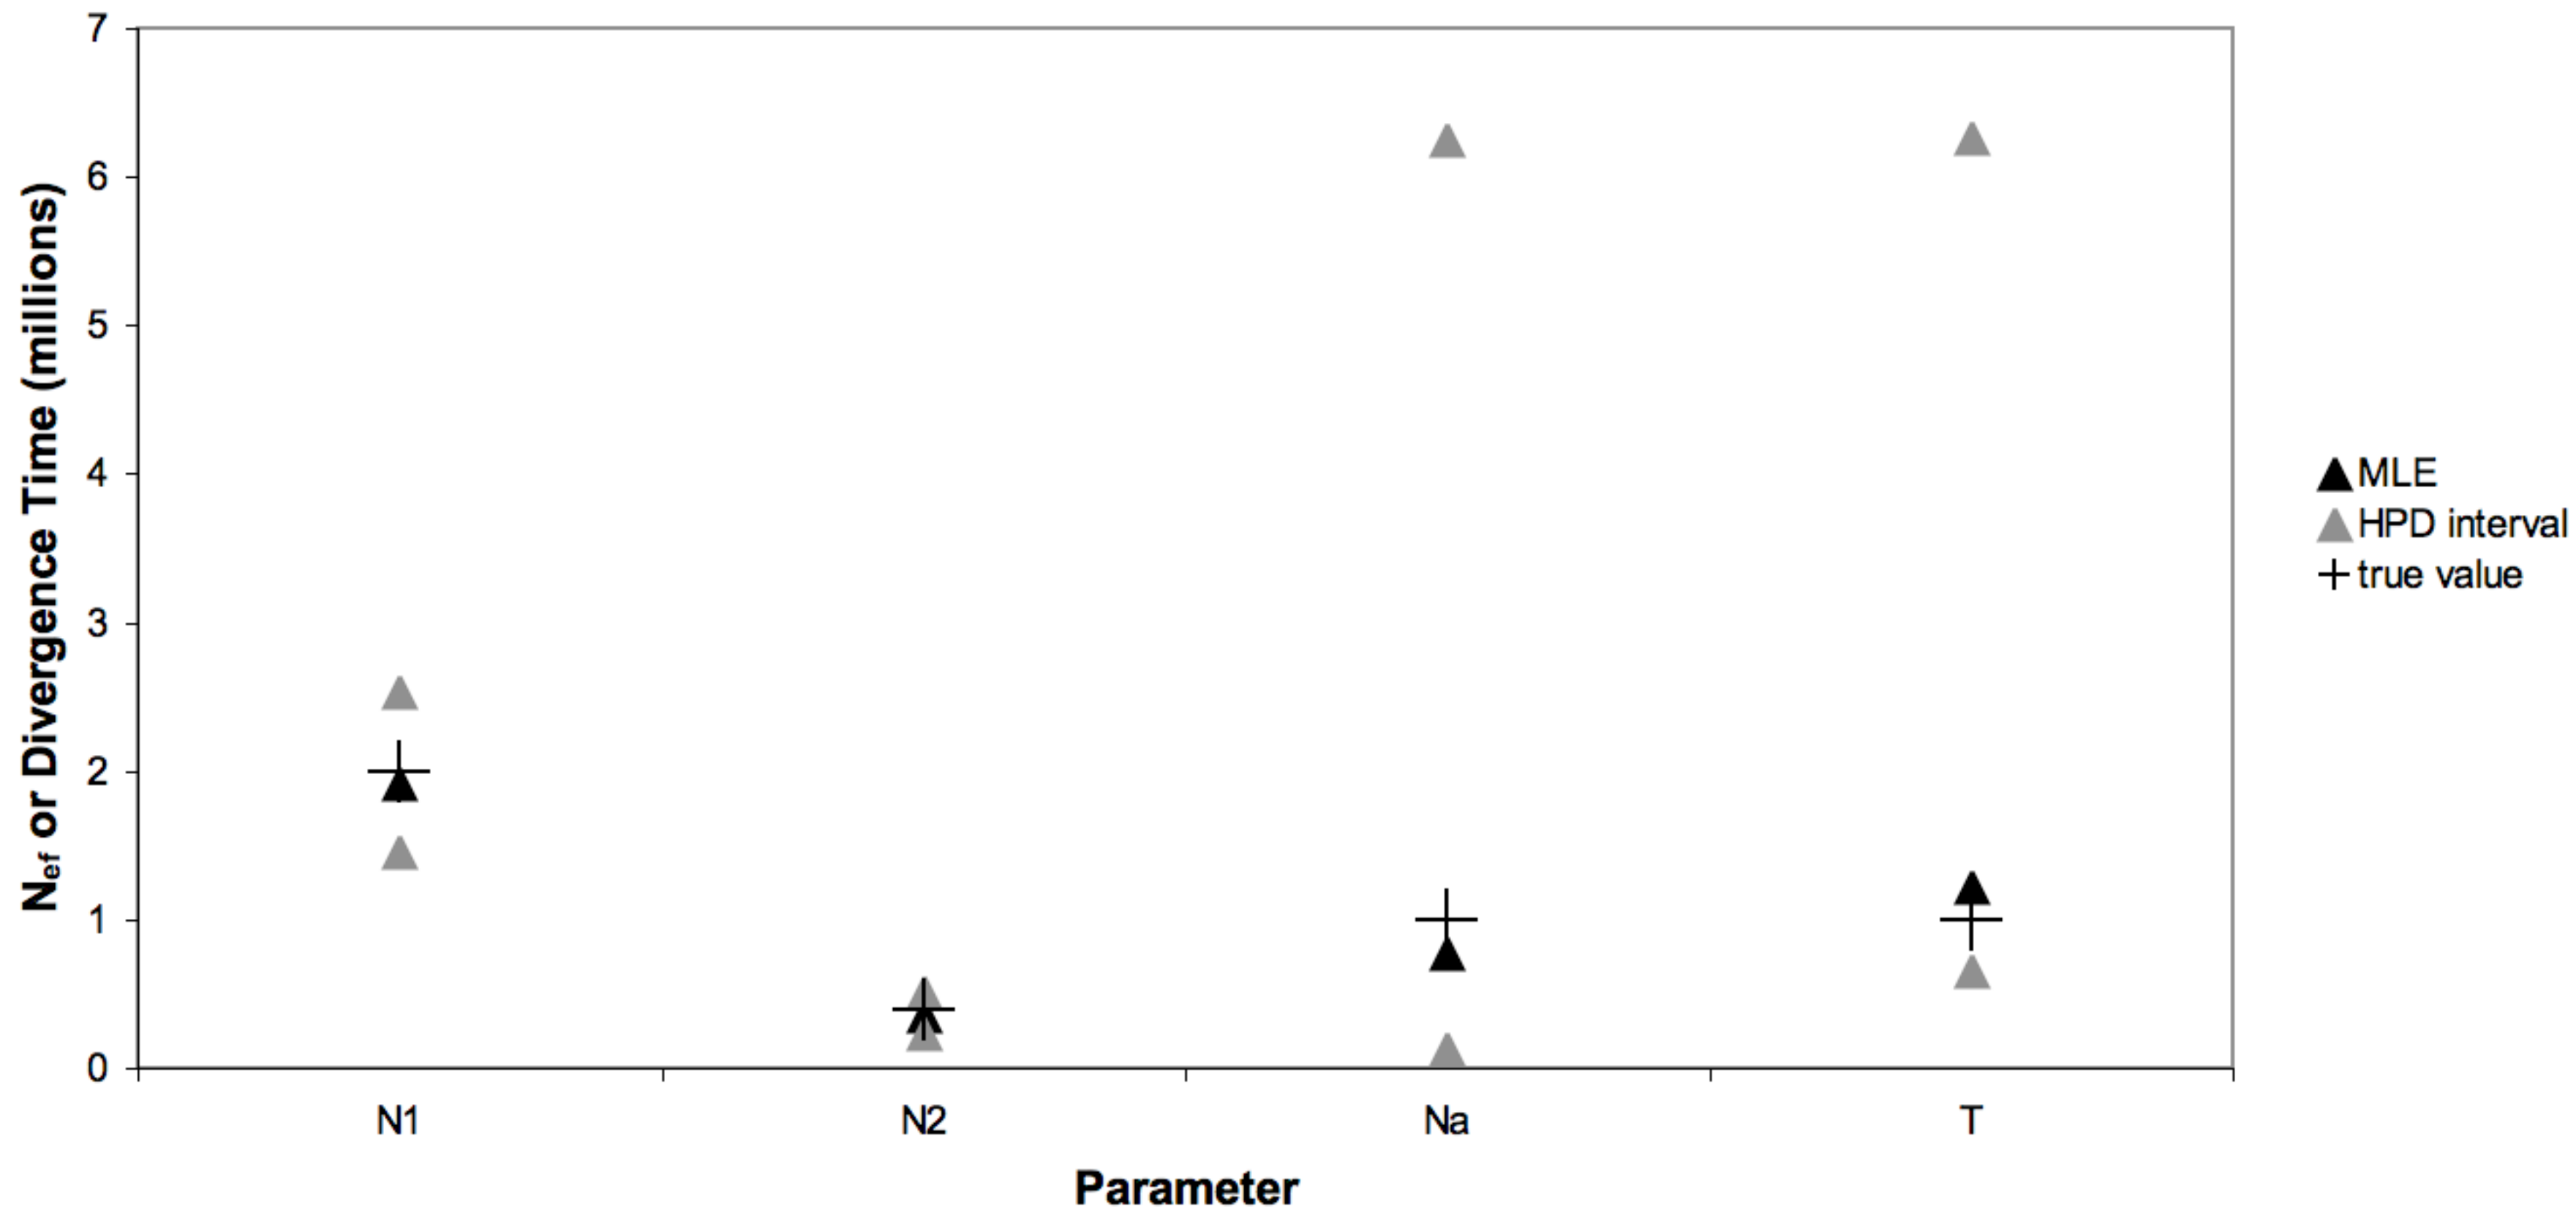

# Gene Flow Rates with Complex Demographic Scenario, Instantaneous Growth

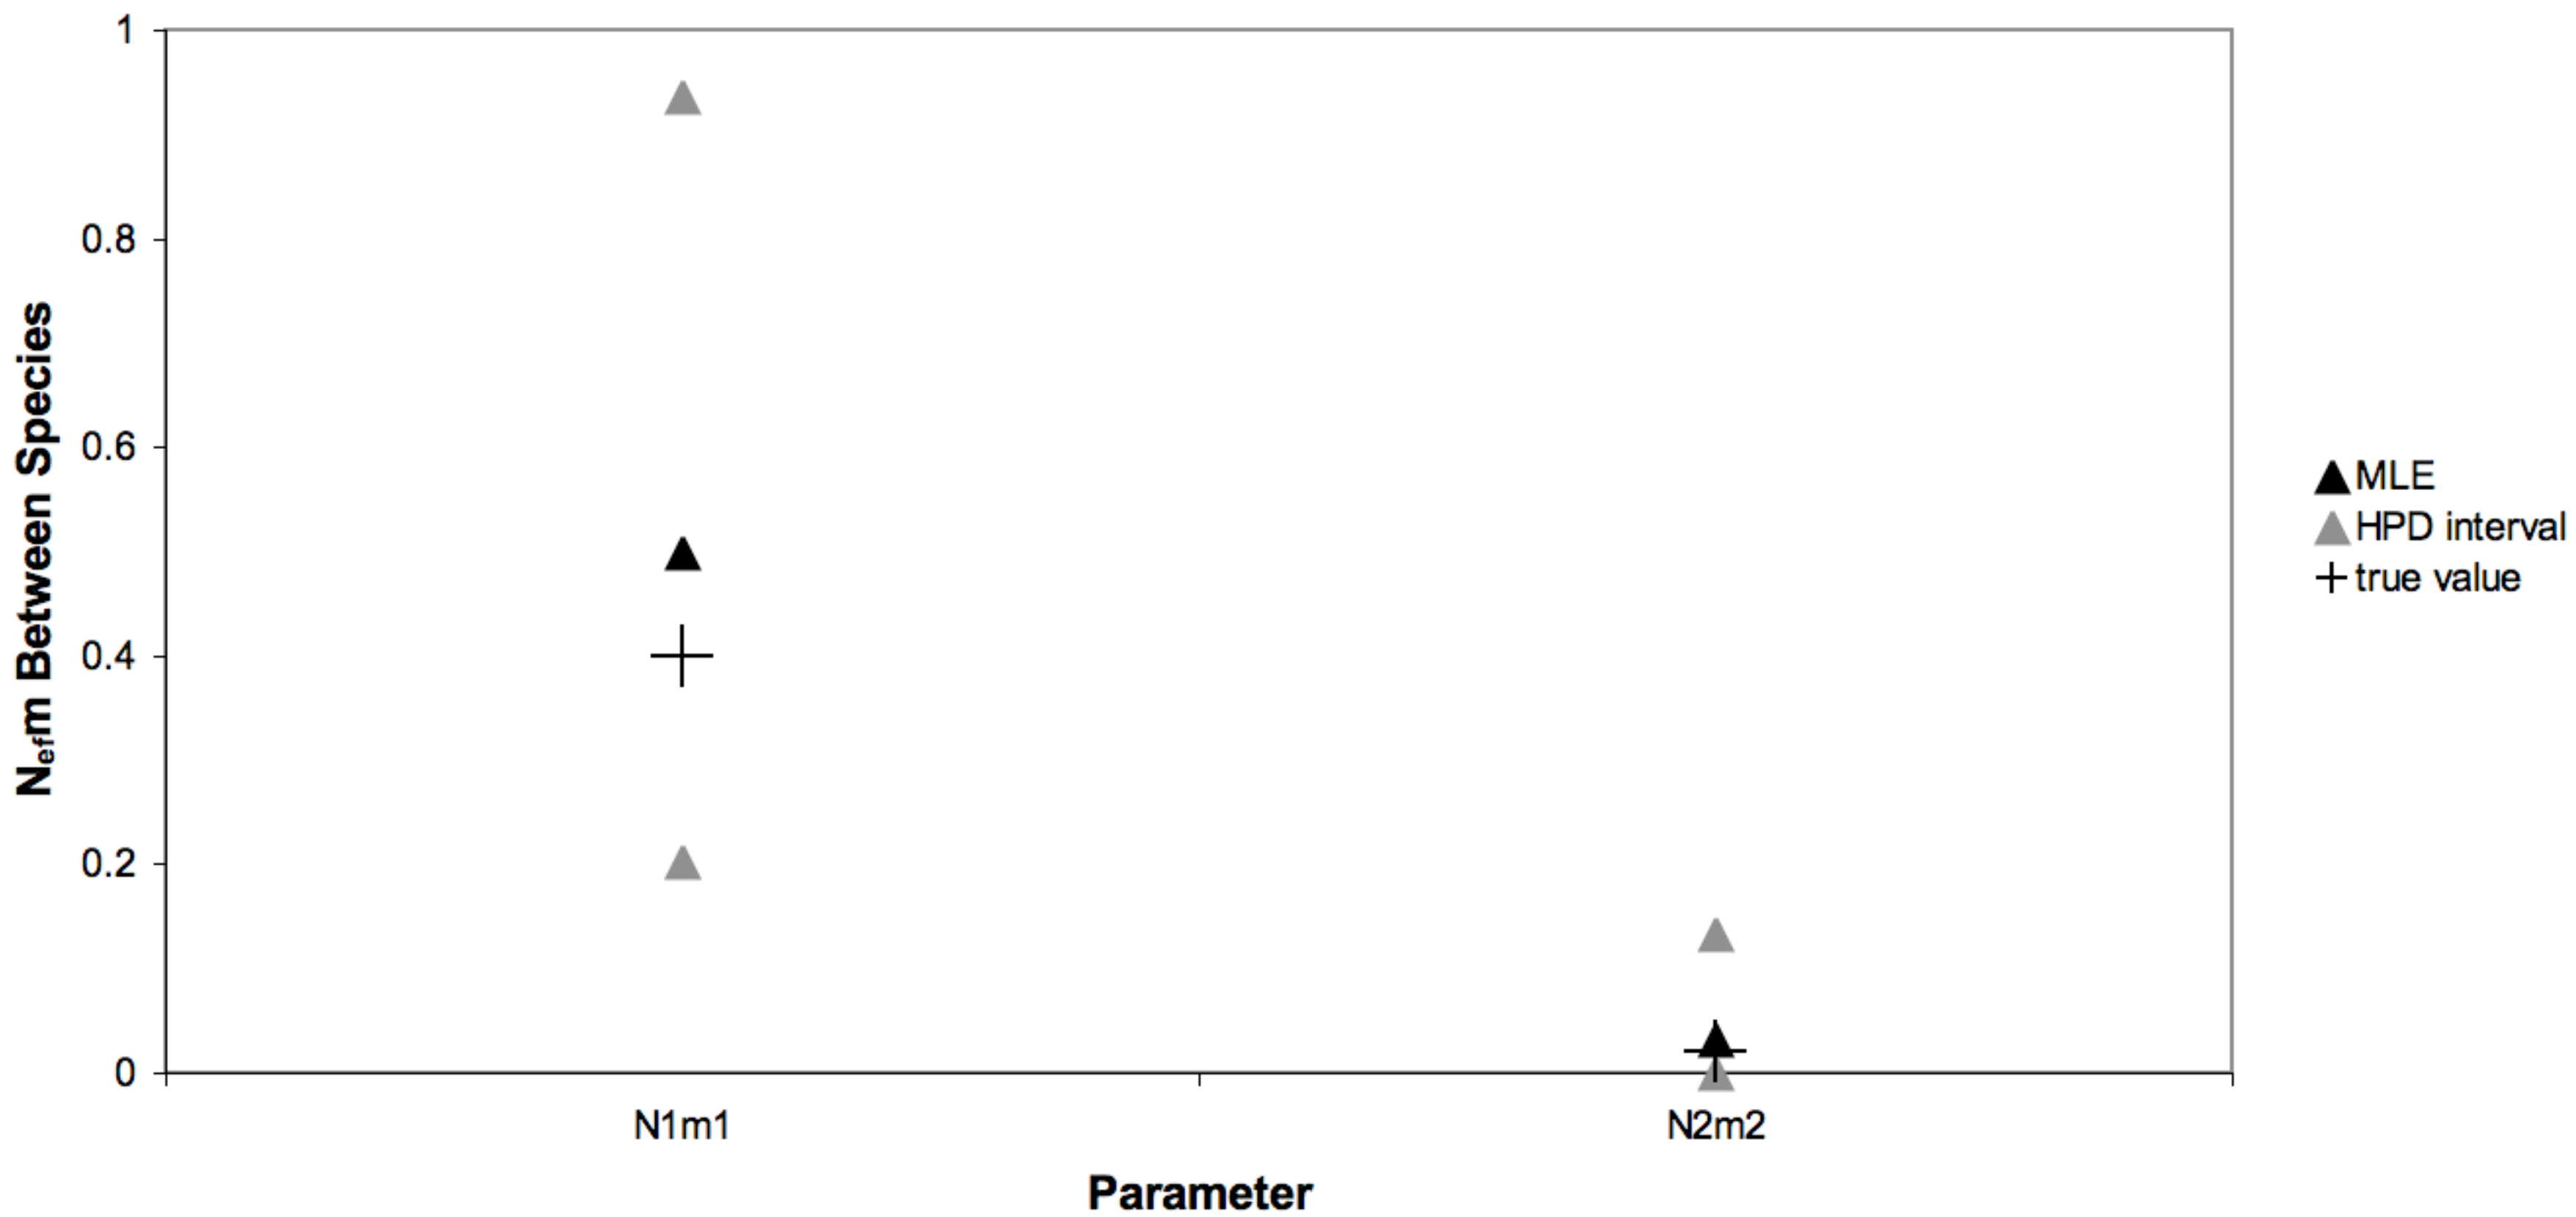



# Percent Coefficient of Variation, Complex Demographic Scenario

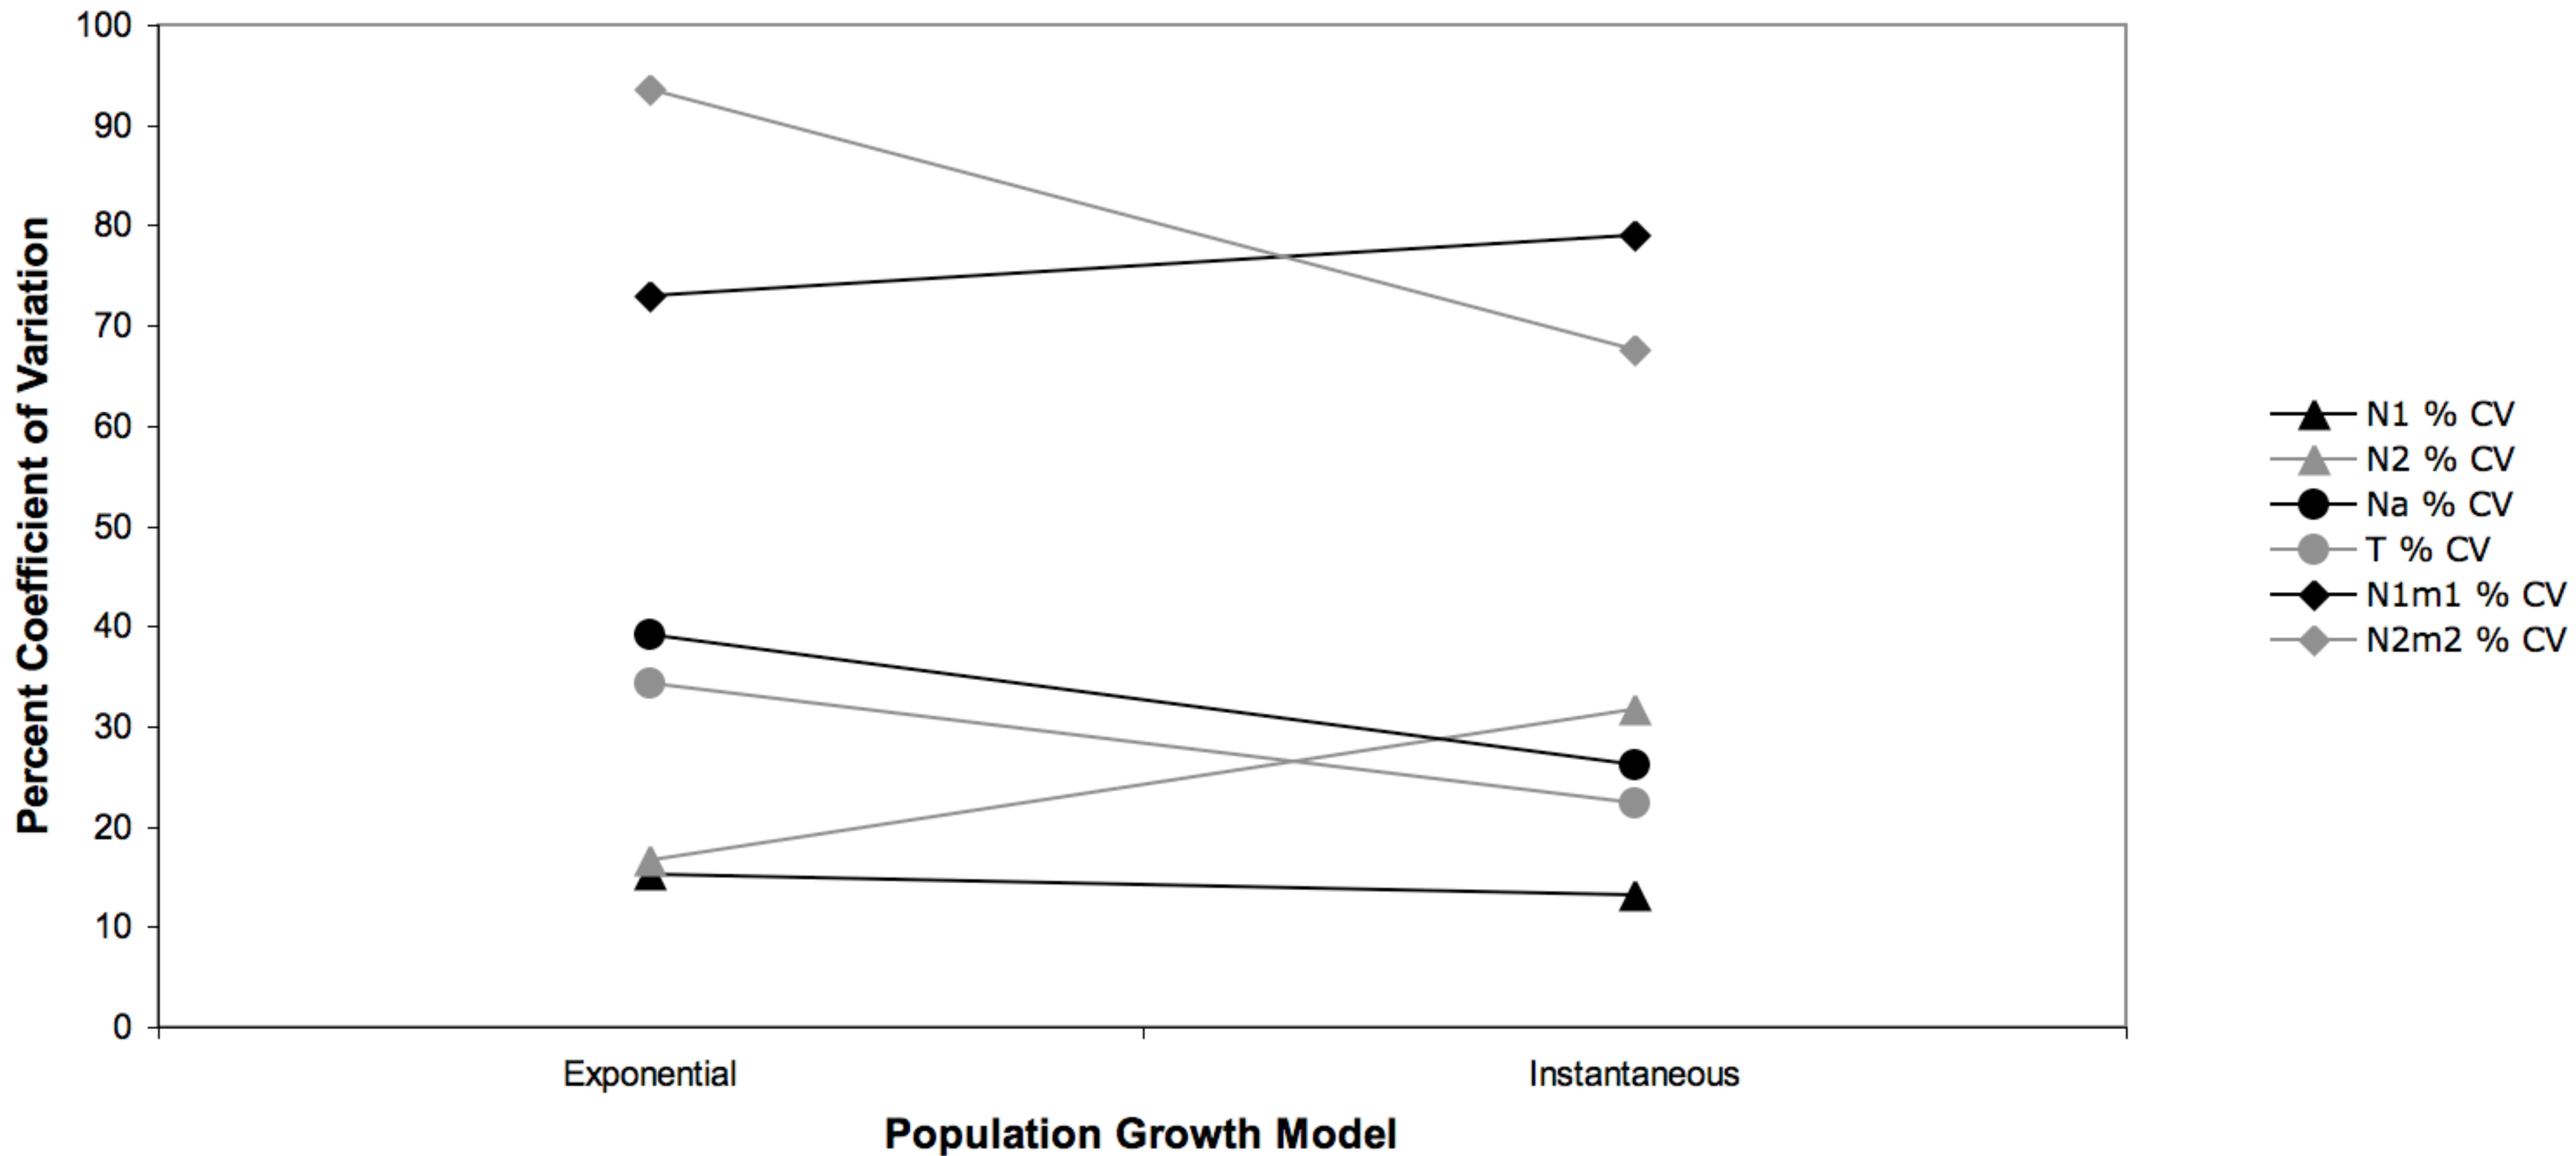

Supplement: msp233_1.pdf [file msp233_1.pdf]
