# Supplementary material
Source: PubMed Central journal article supplement (PMC2877552)

Supplementary File S4.

Graphs of marginal posterior probability densities for the 20 datasets in which the divergence time posterior had a smaller peak near the true value and a larger peak or plateau well above the true value.

The smaller peaks were used for MLEs.

**IS simulation, IS analysis, Dataset #1**

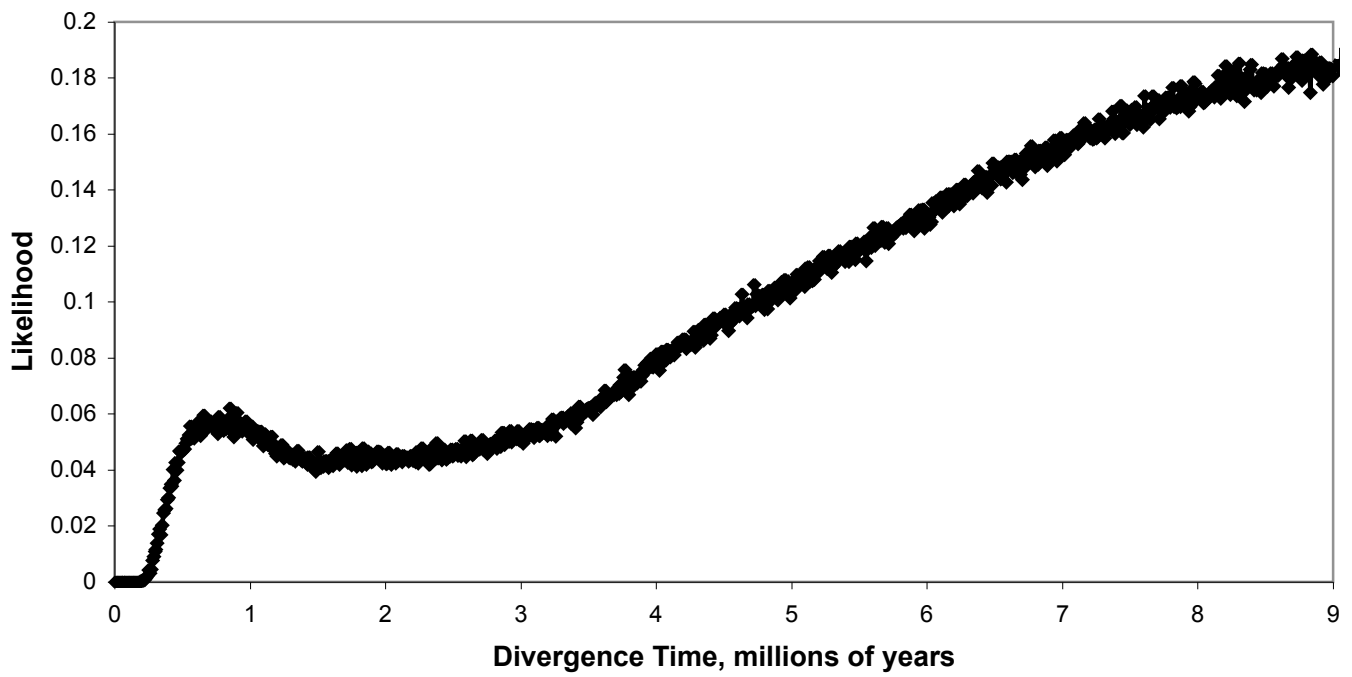

**IS simulation, IS analysis, Dataset #3**

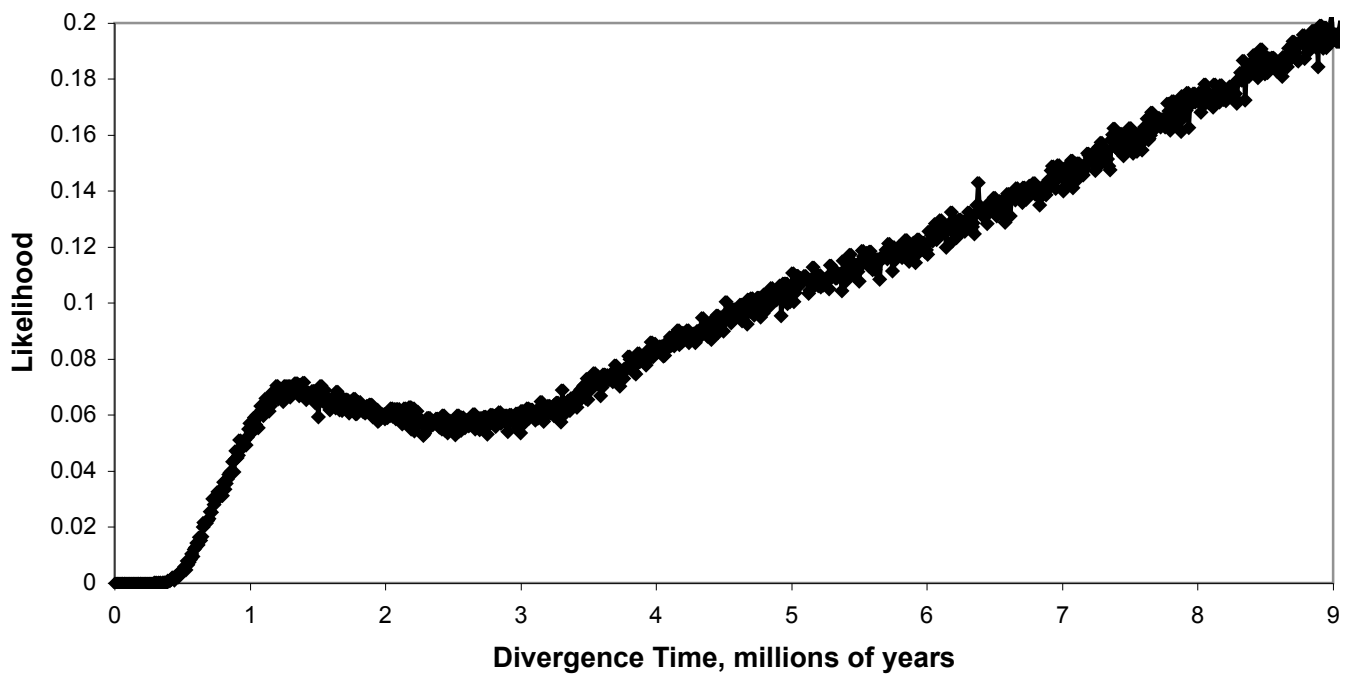

**IS simulation, HKY analysis, Dataset #1**

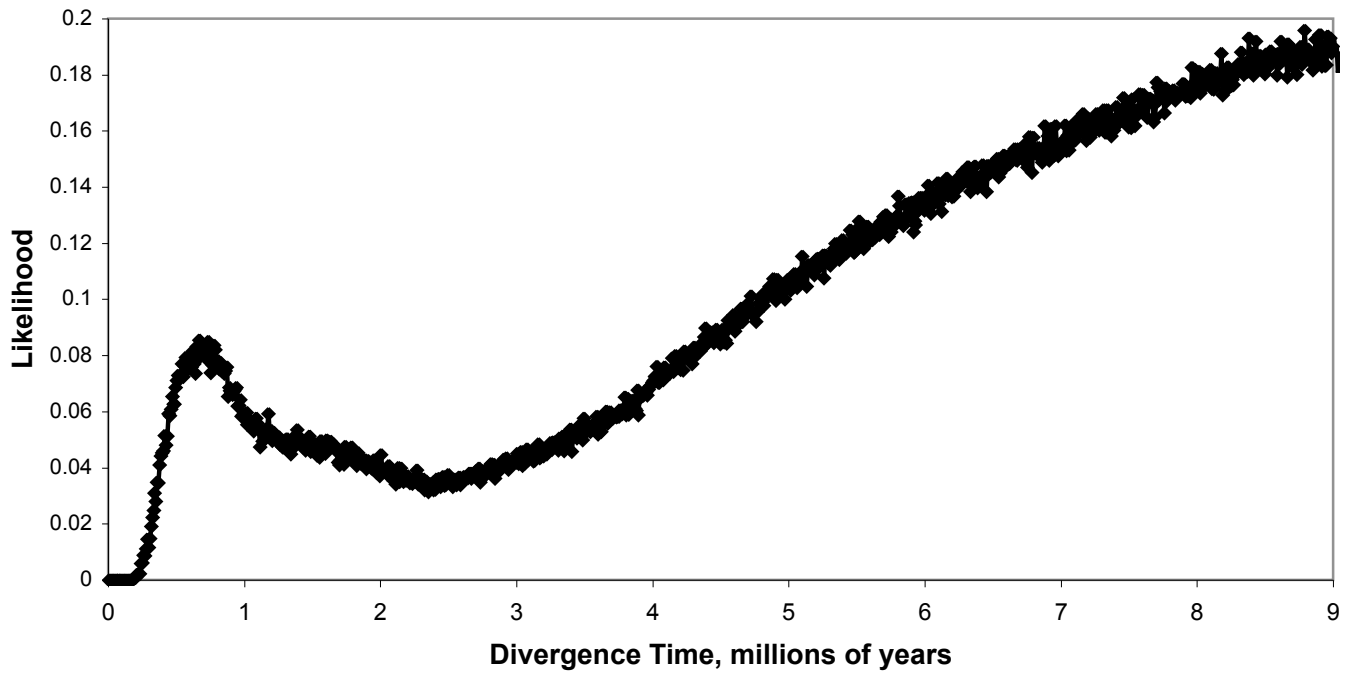

**IS simulation, HKY analysis, Dataset #3**

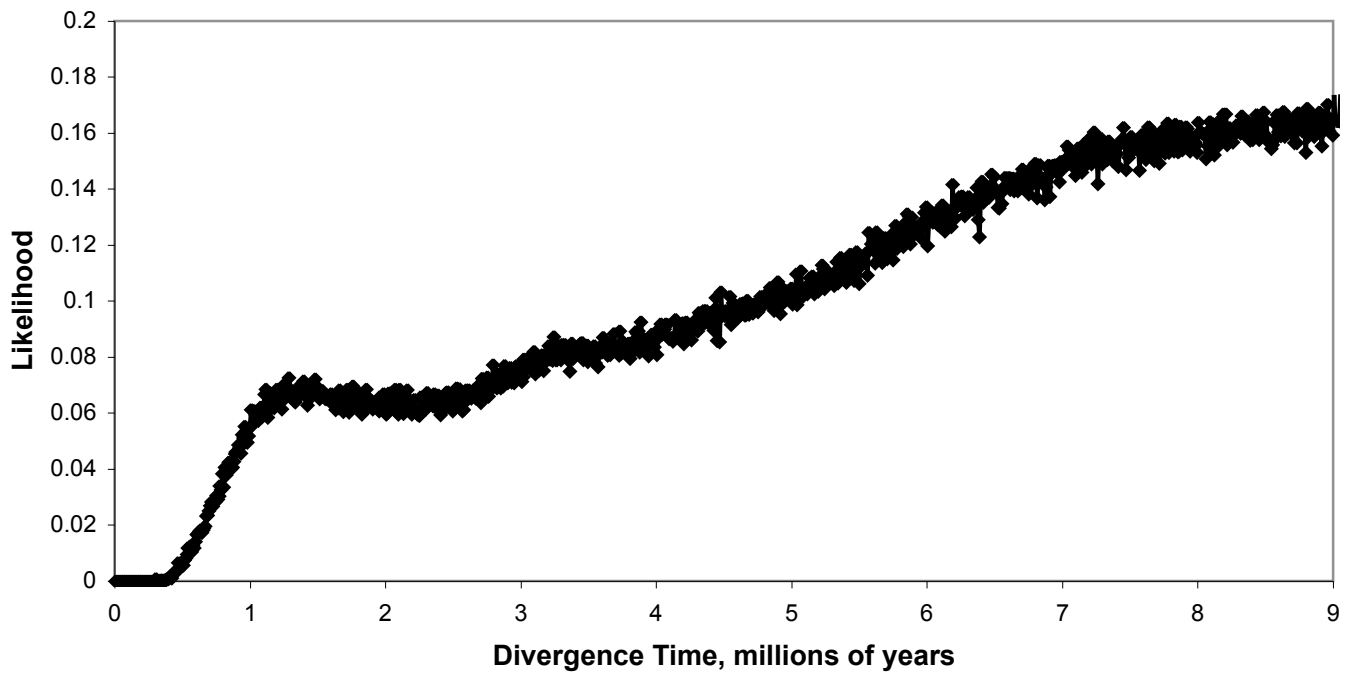

**Non-Recombining Blocks, rho = 0.005, Dataset #2**

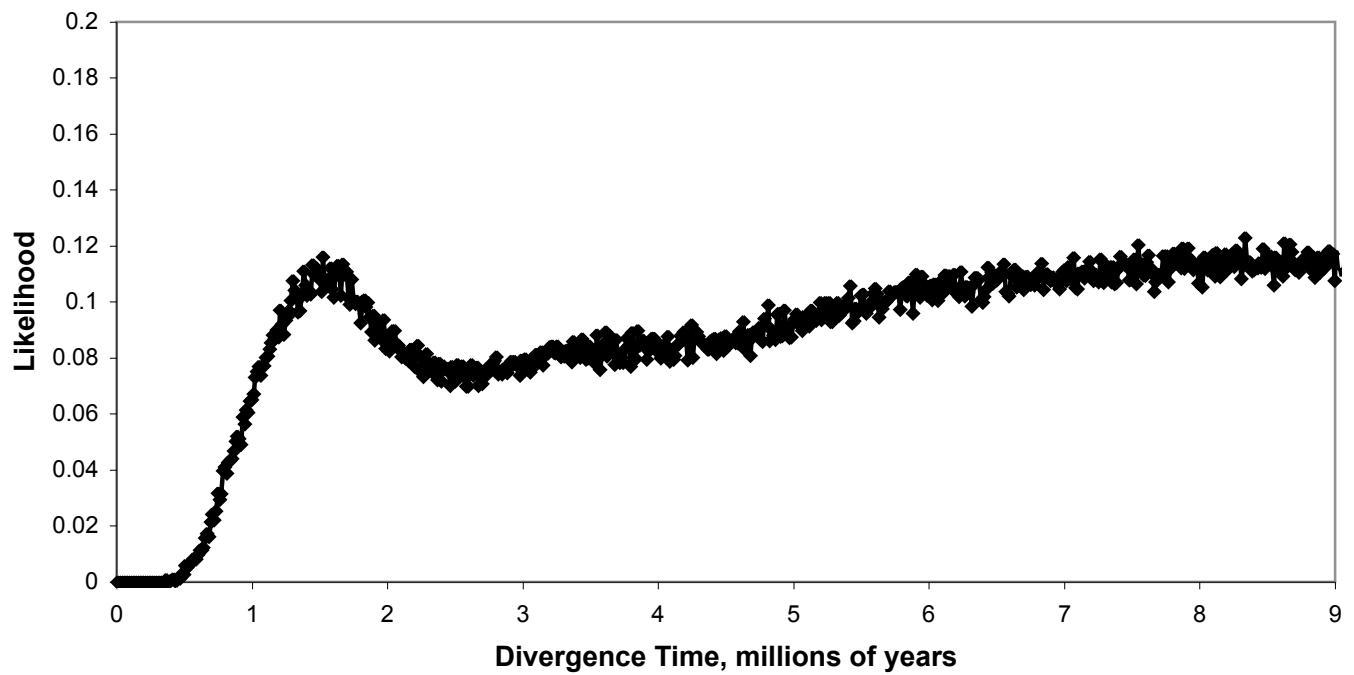

**Non-Recombining Blocks, rho = 0.005, Dataset #5**

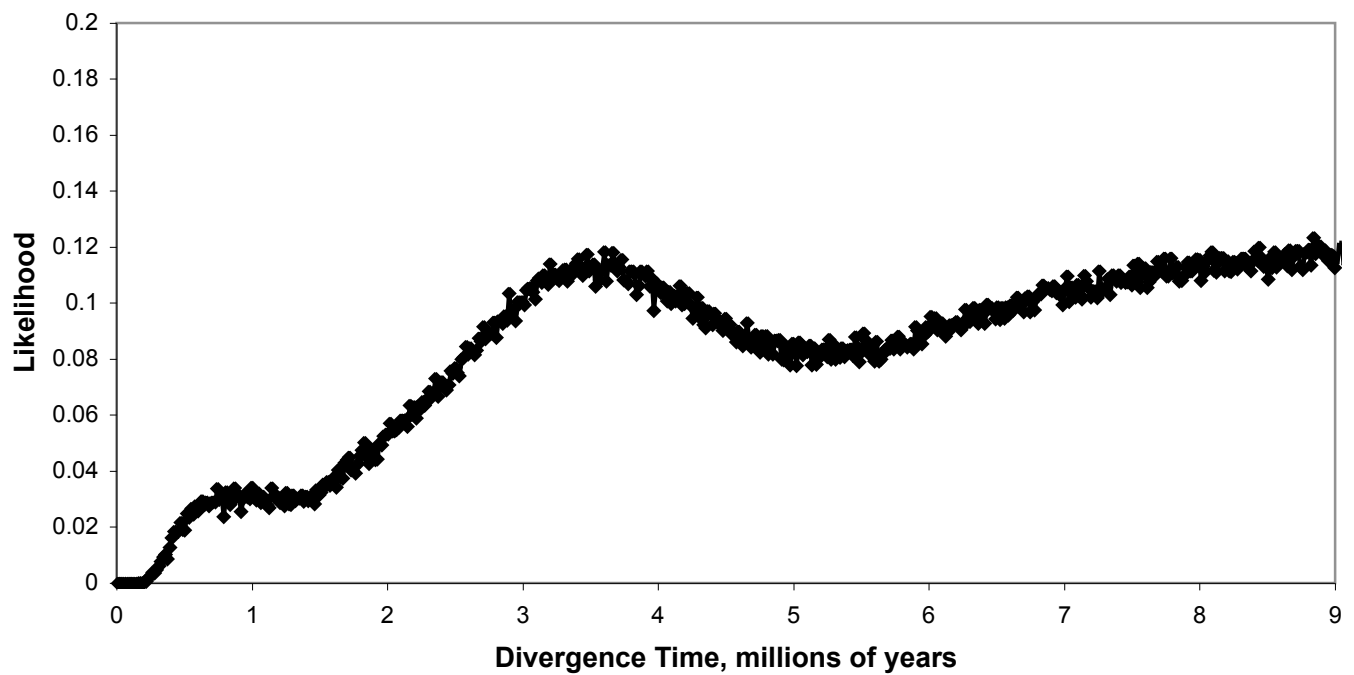

**3<sup>rd</sup> Species Gene Flow,  $N_{ef}m = 0.2$ , Dataset #4**

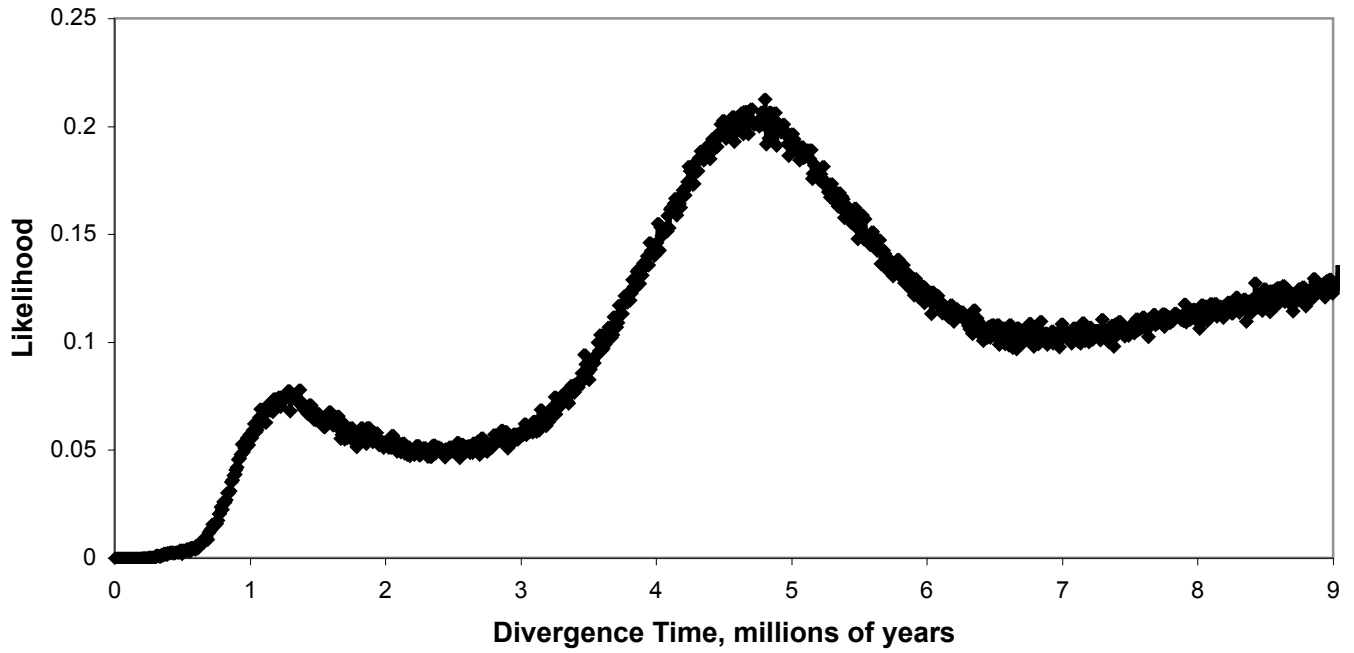

**3<sup>rd</sup> Species Gene Flow,  $N_{ef}m = 0.2$ , Dataset #5**

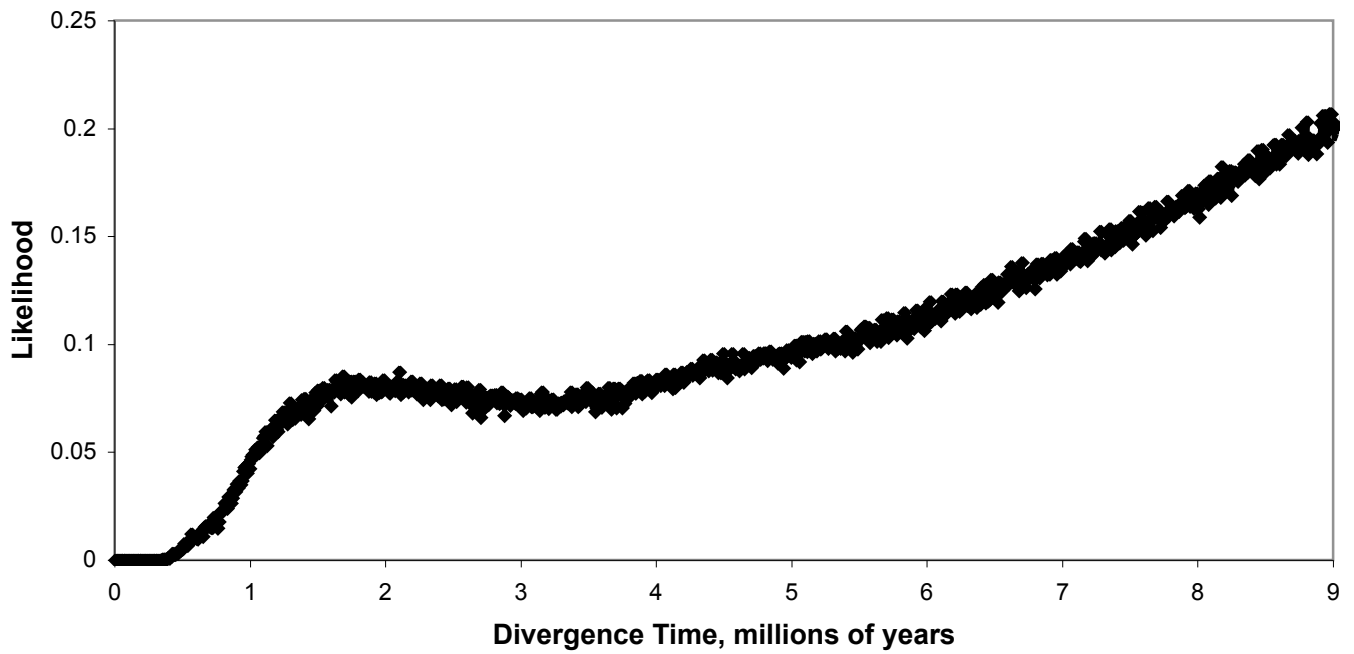

**3<sup>rd</sup> Species Gene Flow,  $N_{ef}m = 0.3$ , Dataset #1**

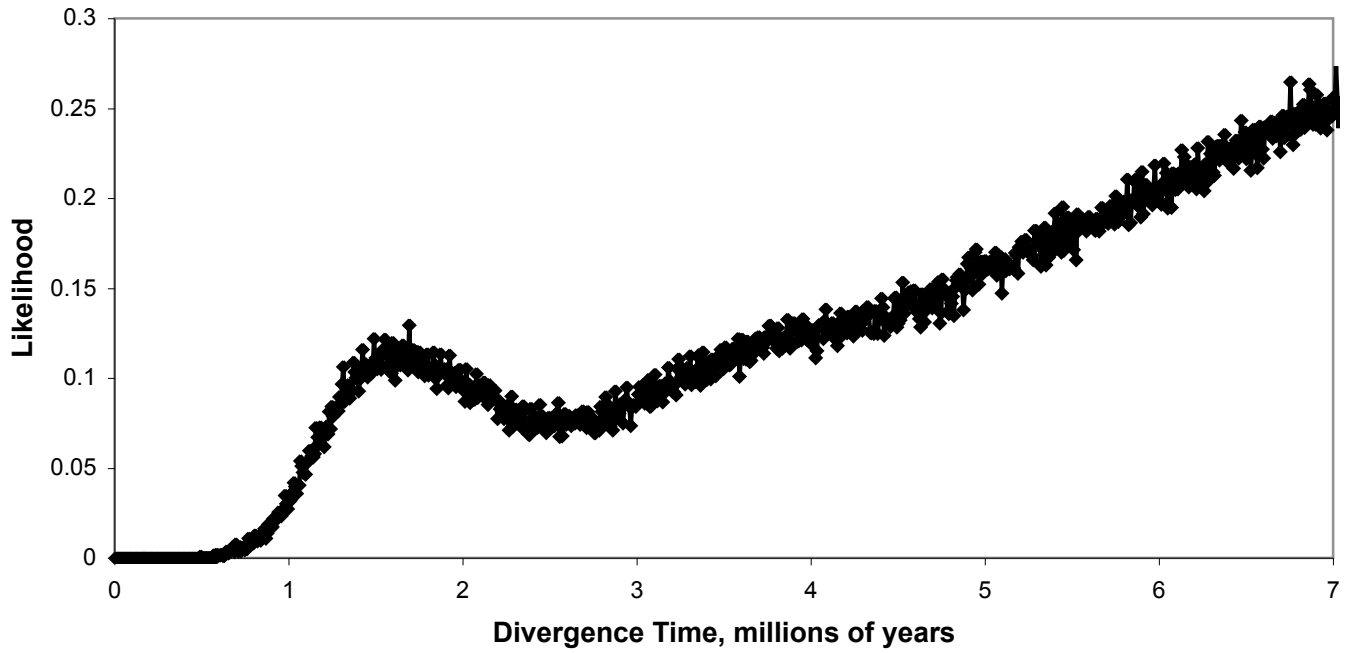

**3<sup>rd</sup> Species Gene Flow,  $N_{ef}m = 0.3$ , Dataset #4**

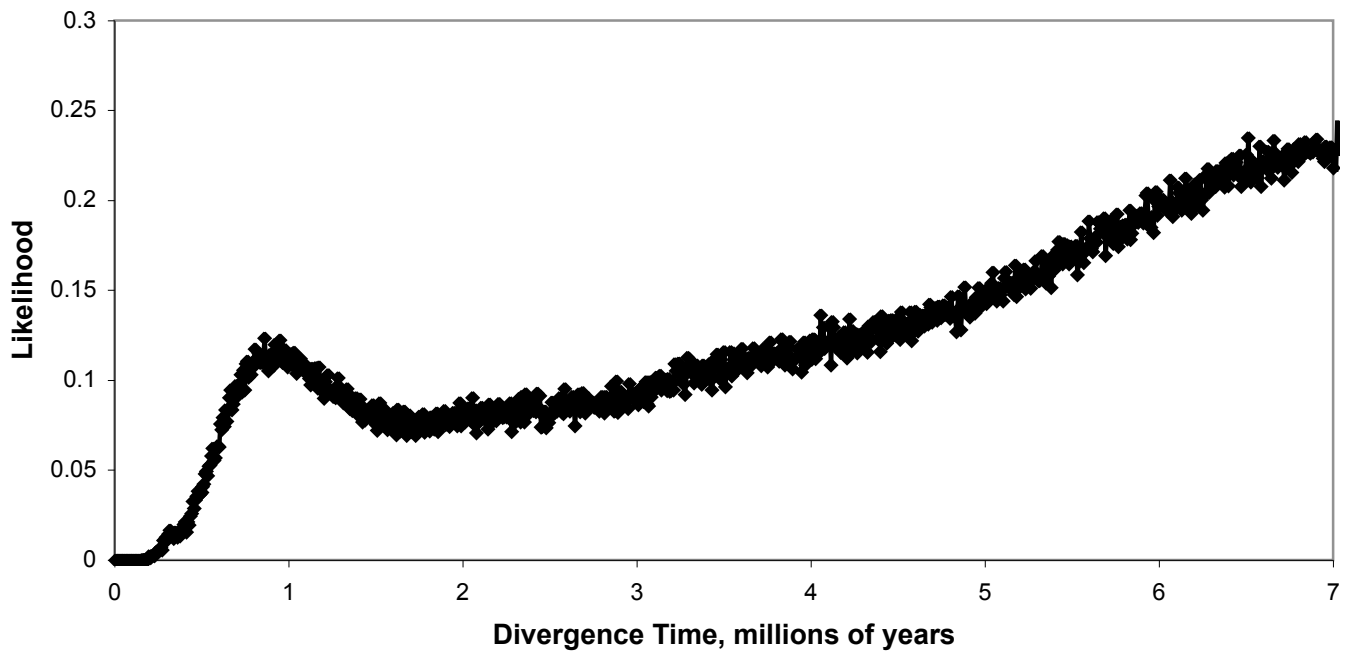

**3<sup>rd</sup> Species Gene Flow,  $N_{ef}m = 0.3$ , Dataset #5**

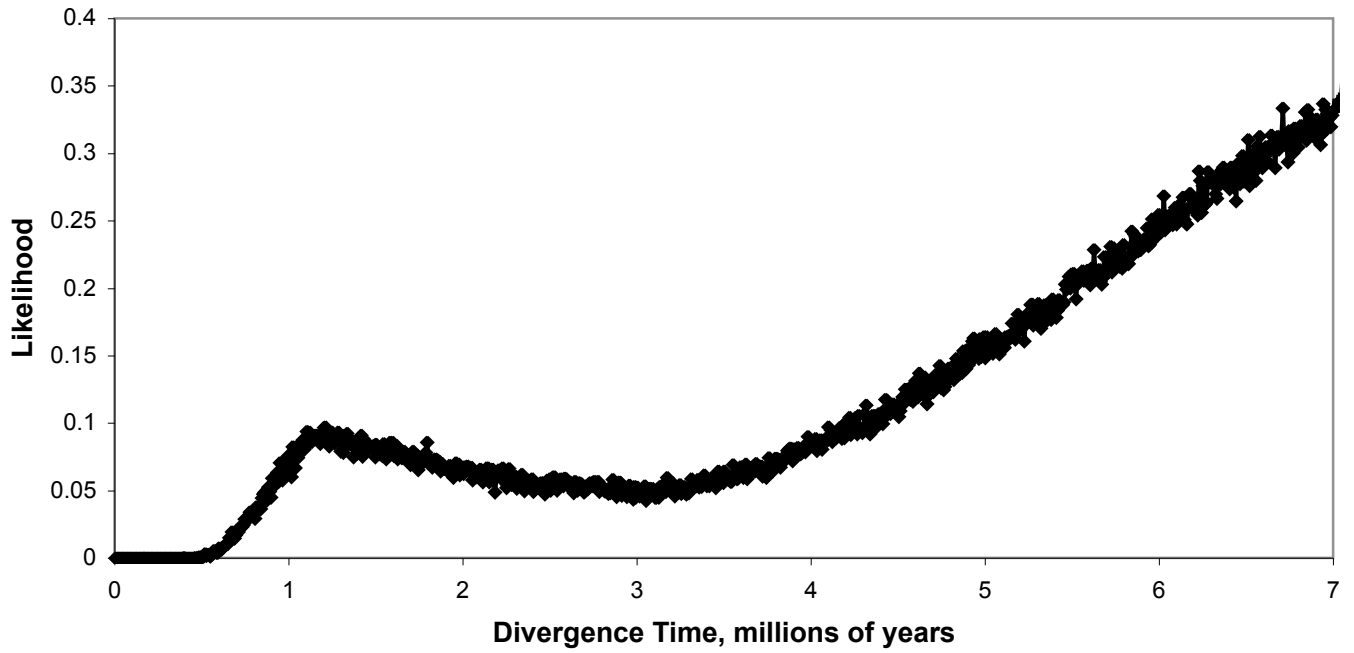

**3<sup>rd</sup> Species Gene Flow,  $N_{ef}m = 0.5$ , Dataset #2**

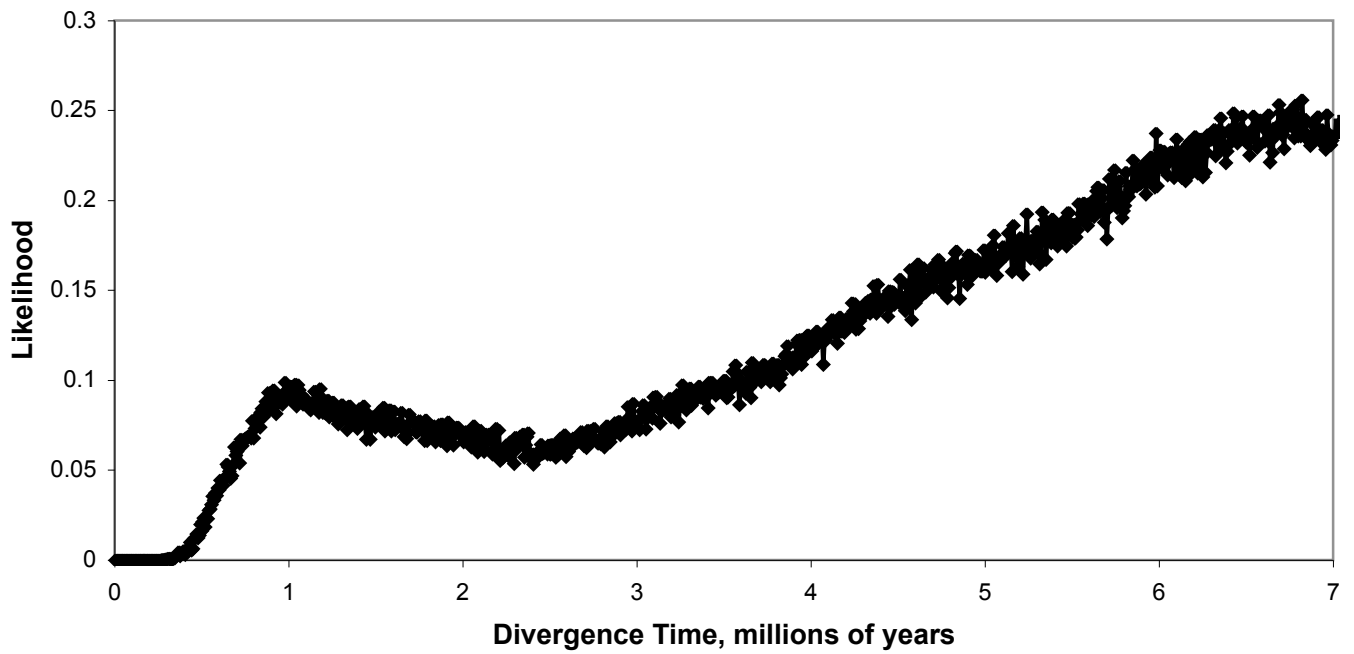

**3<sup>rd</sup> Species Gene Flow,  $N_{ef}m = 0.5$ , Dataset #3**

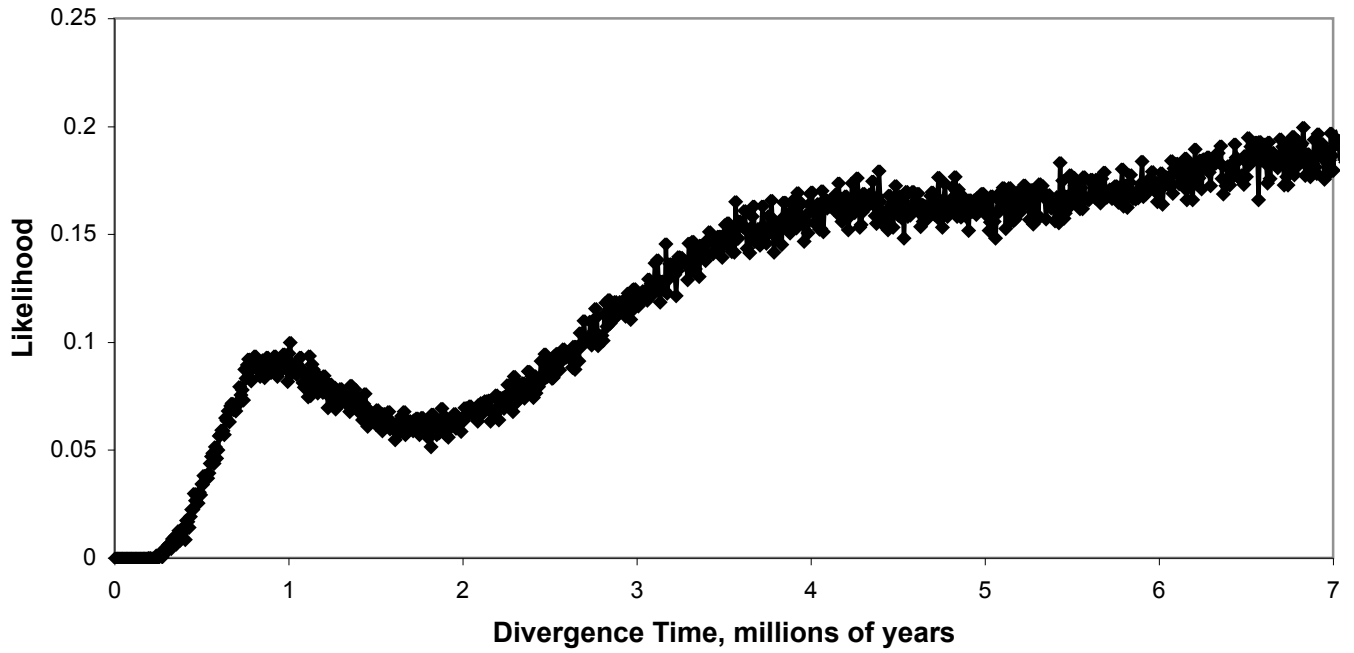

**3<sup>rd</sup> Species Gene Flow,  $N_{ef}m = 0.5$ , Dataset #4**

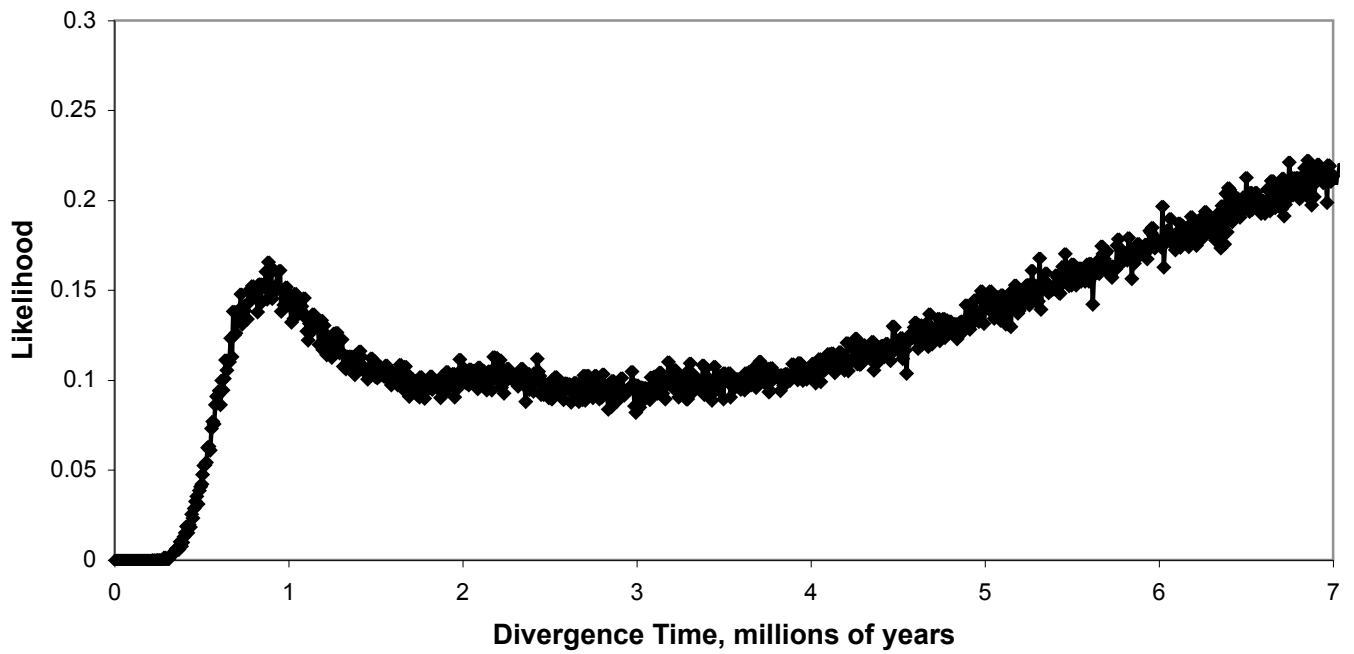



**3<sup>rd</sup> Species Gene Flow,  $N_{ef}m = 0.5$ , Dataset #5**

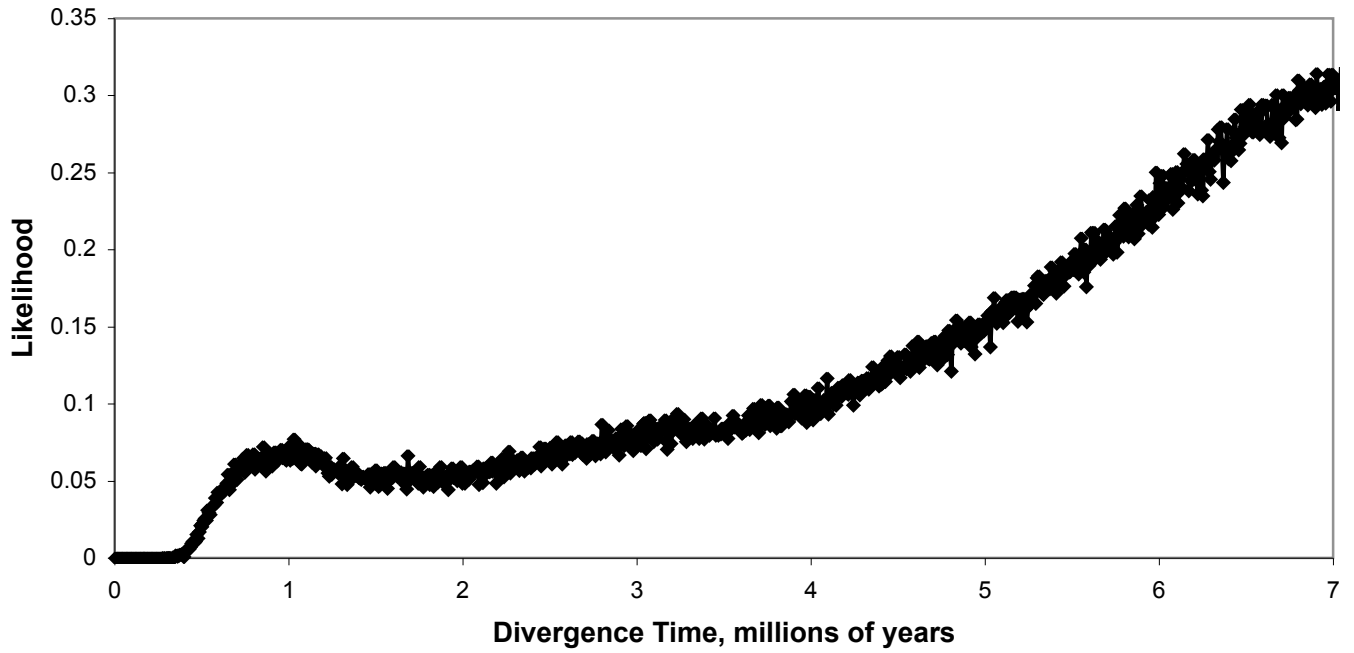

**3<sup>rd</sup> Species Gene Flow,  $N_{ef}m = 1.0$ , Dataset #1**

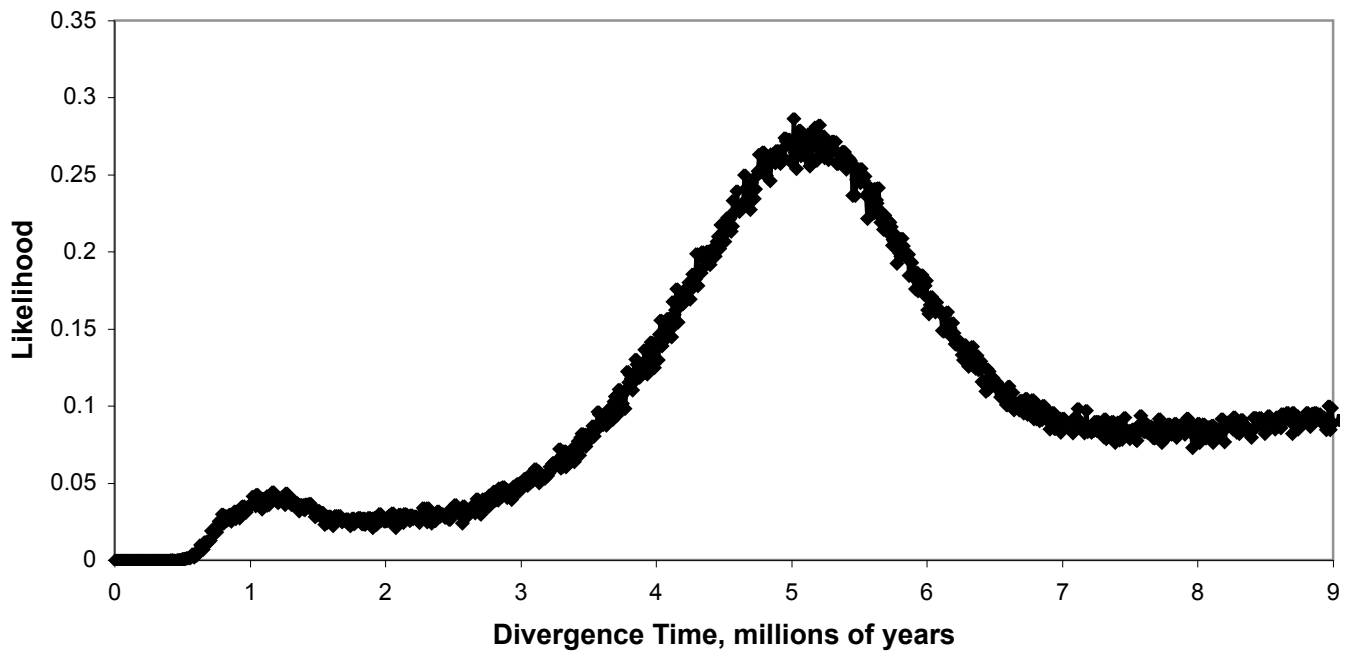

**3<sup>rd</sup> Species Gene Flow,  $N_{ef}m = 1.0$ , Dataset #5**

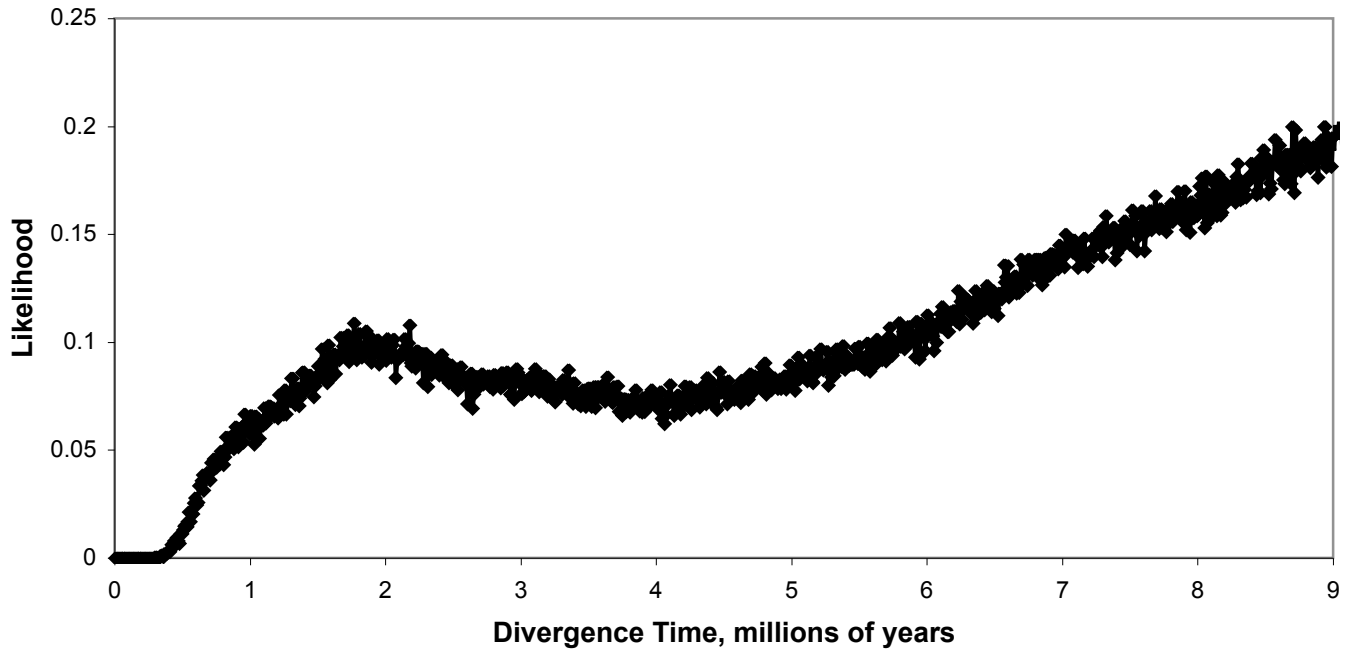

**Linkage,  $r = 0.005$ , Dataset #2**

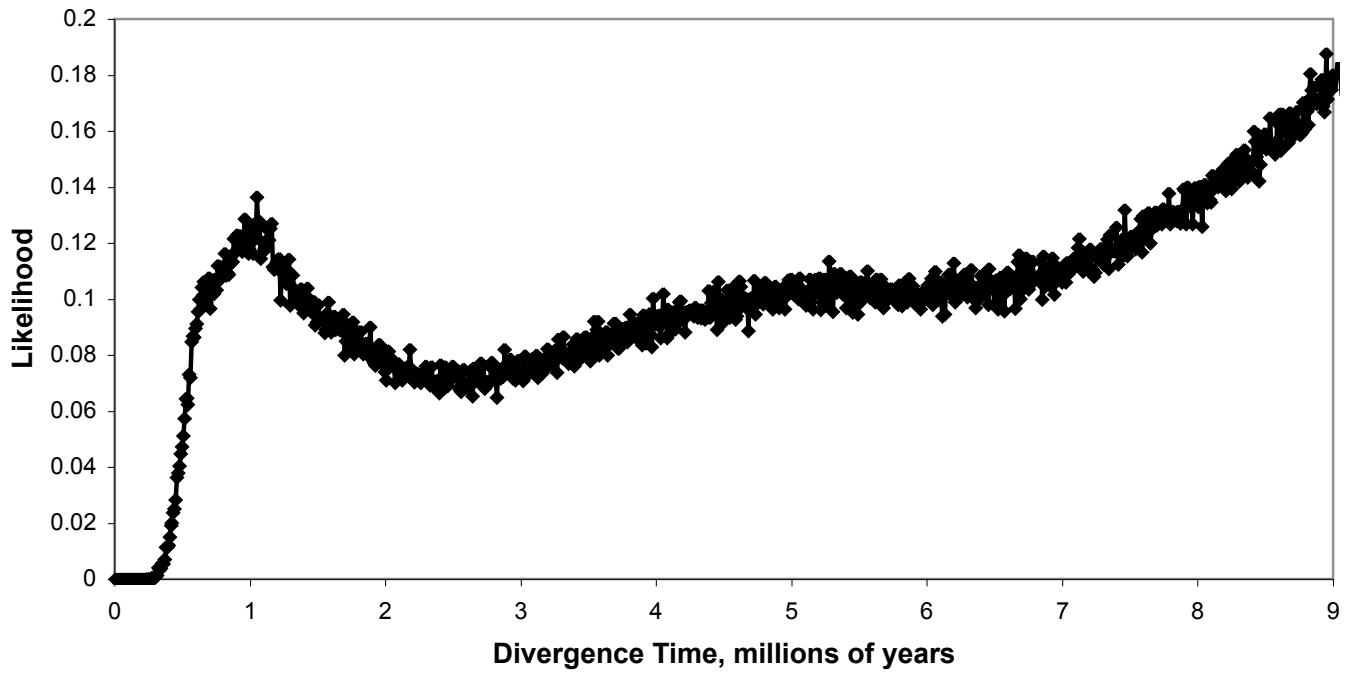

**Selective Sweep, Late Strong, Dataset #3**

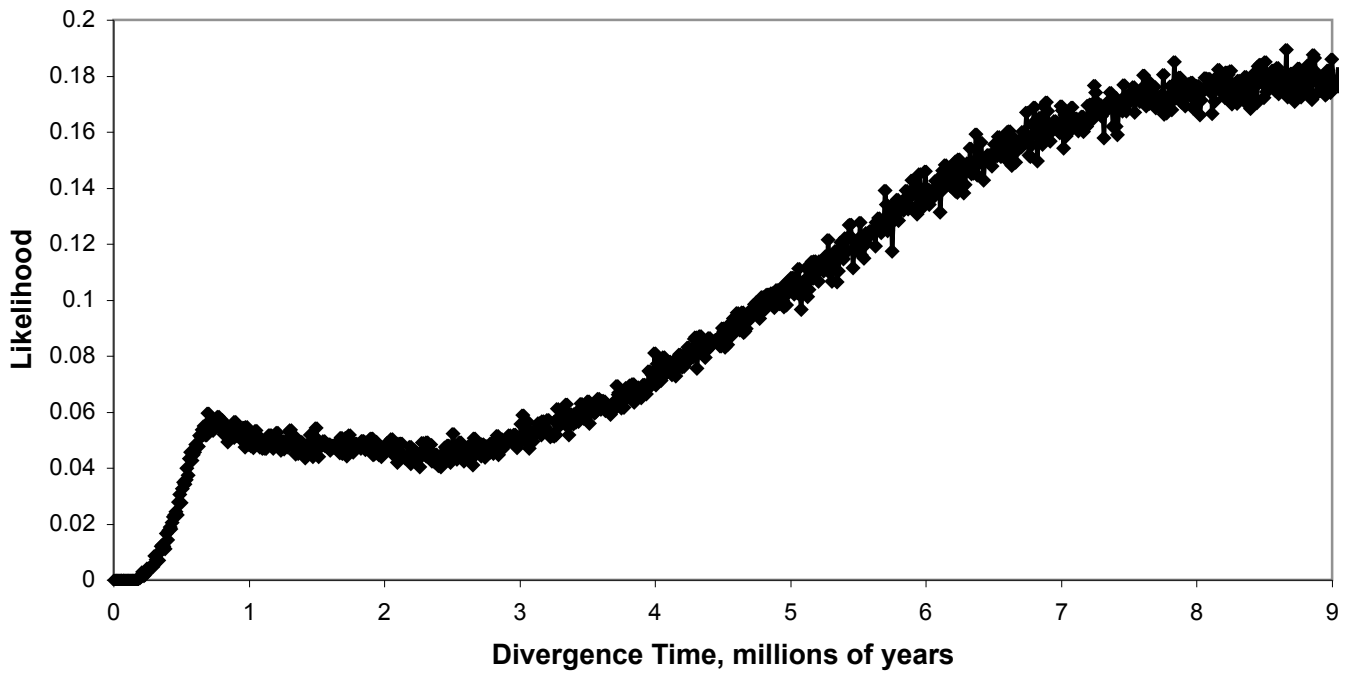

**Complex Demography, Exponential Growth, Dataset #2**

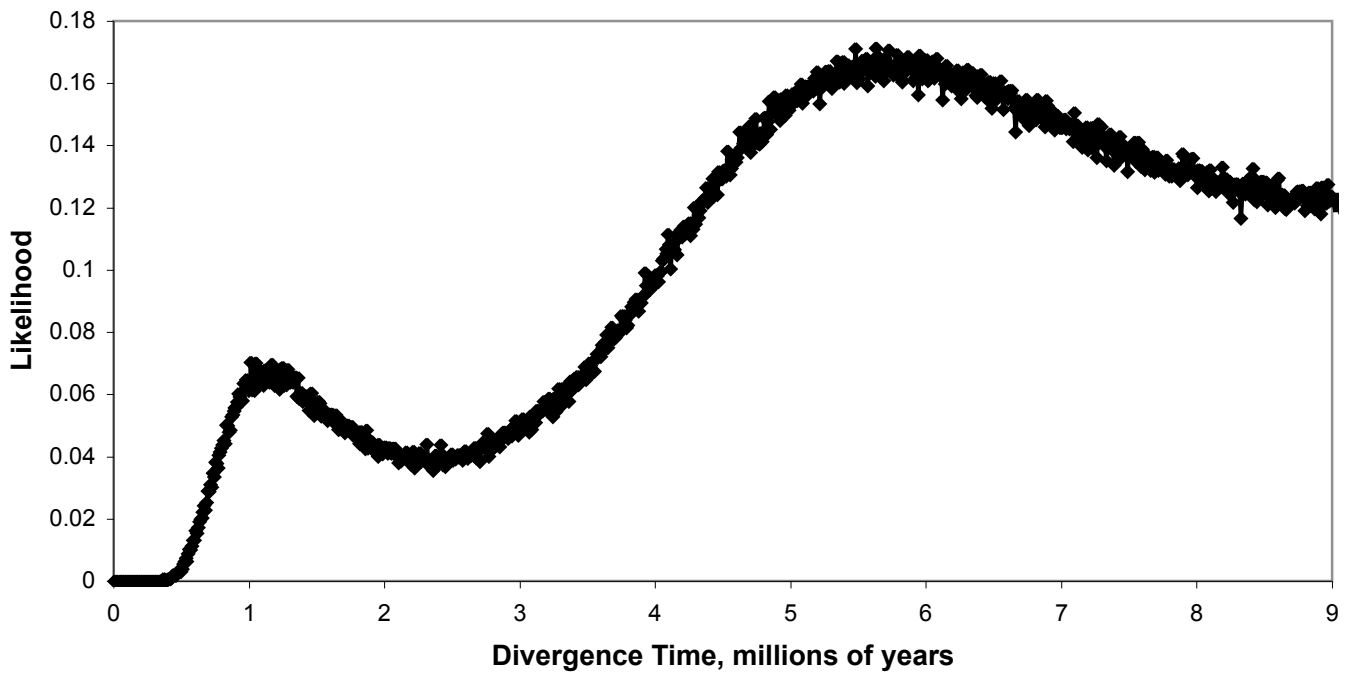

Supplement: msp233_2.pdf [file msp233_2.pdf]
